# Supplementary material for: Antithrombotic treatments in patients with acute ischemic stroke and non-valvular atrial fibrillation before introduction of non-vitamin K antagonist oral anticoagulants into practice in Korea
Source: PLoS One. 2018 Nov 2;13(11):e0202803. doi: 10.1371/journal.pone.0202803 (PMC6214500; doi:10.1371/journal.pone.0202803)
Supplement: S1 Appendix — (XLSX) [file pone.0202803.s001.xlsx]

## Sheet: 1.variable_MIDAM
Data dictionary
Study Title	Antithrombotic Treatments in Patients with Acute Ischemic Stroke and Non-Valvular Atrial Fibrillation before Introduction of Non-vitamin K Antagonist Oral Anticoagulants into Practice in Korea
Issue date / Issuer	2016-07-26	The MIDAM Lab. Department of Biostatistics, College of Medicine, Korea University
[SPAF neuro CRF] 1. Medical chart
Category	Variables	Description	Value
I. Demographic	Gender	Gender	1-male,0=female
	Age	Age	21, 22, …
	Height	Heigh	160.0, 161.0, 162.0, …unkown=99999
	Weight	Weight	50.0, 51.0, …, 100.0, …unkown=99999
	NIHSS_admission	NIHSS at Admission Flage	0, 1, … , 42 unkown=99
	NIHSS_discharge	NIHSS at Diagnosis Flag	0, 1, … , 42 unkown=99
	Age_g	Age group	1='20-54', 2='55-59', 3='60-64' 4='65-69', 5='70-74', 6='≥ 75';
	Age_65	Age 65 group	1='<65 2='≥65';
	BMI	BMI = WEIGHT/((HEIGHT/100)**2)
	DUR	Stroke duration from admission to diagnosis of stroke	1,0,-1
	CHANGE	Change of NIHSS form admission to discharge	1,0,-1
Ⅱ. Clinical characteriscs Ⅲ. Treatment pattern IV. Outcome	CHADS2_Score_n	CHADS2_Score =(CHADS2_Score_C+CHADS2_Score_H+CHADS2_Score_A+CHADS2_Score_D+(2*CHADS2_Score_S))	2,3,4,5,6
	CHA2DS2-VASc_Score_n	CHA2DS2-VASc_Score =(CHA2DS2-VASc_Score_C + CHA2DS2-VASc_Score_H + (2*CHA2DS2-VASc_Score_A_75) + CHA2DS2-VASc_Score_D + (2*CHA2DS2-VASc_Score_Stroke) + CHA2DS2-VASc_Score_V + CHA2DS2-VASc_Score_A_65 + CHA2DS2-VASc_Score_Sex_N)	2,3,4,5,6
	treatment_pattern	treatment at discharge	1=Yes, 2=None
	treatment_pattern_VKA	VKA flag	1=Yes, 0=No
	treatment_pattern_Anti	Antiplatelet flag	1=Yes, 0=No
	treatment_pattern_Anti_Asprin	Aspirin flag	1=Yes, 0=No
	treatment_pattern_Anti_Clopidogrel	Clopidogrel flag	1=Yes, 0=No
	treatment_pattern_Anti_Other	Other flag	1=Yes, 0=No
	INR_measure	INR flag	1=Yes, 0=No
	INR	INR value	0.84, 0.85, … , 1.21, unkown=9999
	discharge_1M	discharge at 1 month(±2weeks)	1=discharge 2=ambulatory care 3=readmission 4=none
	treatment_pattern_1M	treatment at 1 month(±2weeks)	1=treatment at discharge 2=maintain 3=change 4=None
	treatment_pattern_VKA_1M	[at 1 month(±2weeks)] VKA flag	1=Yes, 0=No
	treatment_pattern_Anti_1M	[at 1 month(±2weeks)]Antiplatelet flag	1=Yes, 0=No
	treatment_pattern_Anti_Asprin_1M	[at 1 month(±2weeks)]Aspirin flag	1=Yes, 0=No
	treatment_pattern_Anti_Clopidogrel_1M	[at 1 month(±2weeks)] Clopidogrel flag	1=Yes, 0=No
	treatment_pattern_Anti_Other_1M	[at 1 month(±2weeks)] Other flag	1=Yes, 0=No
	INR_measure_1M	[at 1 month(±2weeks)] INR flag	1=Yes, 2=No
	INR_1M	[at 1 month(±2weeks)] INR value	0.84, 0.85, … , 1.21, unkown=9999
	discharge_2M	discharge at 2 months(±2weeks)	1=discharge 2=ambulatory care 3=readmission) 4=none
	treatment_pattern_2M	treatment at 2 months(±2weeks)	1=treatment at discharge 2=maintain 3=change 4=None
	treatment_pattern_VKA_2M	[at 2 months(±2weeks)] VKA flag	1=Yes, 0=No
	treatment_pattern_Anti_2M	[at 2 months(±2weeks)]Antiplatelet flag	1=Yes, 0=No
	treatment_pattern_Anti_Asprin_2M	[at 2 months(±2weeks)]Aspirin flag	1=Yes, 0=No
	treatment_pattern_Anti_Clopidogrel_2M	[at 2 months(±2weeks)] Clopidogrel flag	1=Yes, 0=No
	treatment_pattern_Anti_Other_2M	[at 2 months(±2weeks)] Other flag	1=Yes, 0=No
	INR_measure_2M	[at 2 months(±2weeks)] INR flag	1=Yes, 2=No
	INR_2M	[at 2 months(±2weeks)] INR value	0.84, 0.85, … , 1.21, unkown=9999
	discharge_3M	discharge at 3 months(±1month)	1=discharge 2=ambulatory care 3=readmission 4=none
	treatment_pattern_3M	treatment at 3 months(±1month)	1=treatment at discharge 2=maintain 3=change 4=None
	treatment_pattern_VKA_3M	[at 3 months(±1month)] VKA flag	1=Yes, 0=No
	treatment_pattern_Anti_3M	[at 3 months(±1month)] Antiplatelet flag	1=Yes, 0=No
	treatment_pattern_Anti_Asprin_3M	[at 3 months(±1month)] Aspirin flag	1=Yes, 0=No
	treatment_pattern_Anti_Clopidogrel_3M	[at 3 months(±1month)] Clopidogrel flag	1=Yes, 0=No
	treatment_pattern_Anti_Other_3M	[at 3 months(±1month)] Other flag	1=Yes, 0=No
	INR_measure_3M	[at 3 months(±1month)] INR flag	1=Yes, 2=No
	INR_3M	[at 3 months(±1month)] INR value	0.84, 0.85, … , 1.21, unkown=9999
	discharge_6M	discharge at 6 months(±1month)	1=discharge 2=ambulatory care 3=readmission 4=none
	treatment_pattern_6M	treatment at 6 months(±1month)	1=treatment at discharge 2=maintain 3=change 4=None
	treatment_pattern_VKA_6M	[at 6 months(±1month)] VKA flag	1=Yes, 0=No
	treatment_pattern_Anti_6M	[at 6 months(±1month)] Antiplatelet flag	1=Yes, 0=No
	treatment_pattern_Anti_Asprin_6M	[at 6 months(±1month)] Aspirin flag	1=Yes, 0=No
	treatment_pattern_Anti_Clopidogrel_6M	[at 6 months(±1month)] Clopidogrel flag	1=Yes, 0=No
	treatment_pattern_Anti_Other_6M	[at 6 months(±1month)] Other flag	1=Yes, 0=No
	INR_measure_6M	[at 6 months(±1month)] INR flag	1=Yes, 2=No
	INR_6M	[at 6 months(±1month)] INR value	0.84, 0.85, … , 1.21, unkown=9999
	discharge_9M	discharge at 9 months(±1month)	1=discharge 2=ambulatory care 3=readmission 4=none
	treatment_pattern_9M	treatment at 9 months(±1month)	1=treatment at discharge 2=maintain 3=change 4=None
	treatment_pattern_VKA_9M	[at 9 months(±1month)] VKA flag	1=Yes, 0=No
	treatment_pattern_Anti_9M	[at 9 months(±1month)] Antiplatelet flag	1=Yes, 0=No
	treatment_pattern_Anti_Asprin_9M	[at 9 months(±1month)] Aspirin flag	1=Yes, 0=No
	treatment_pattern_Anti_Clopidogrel_9M	[at 9 months(±1month)] Clopidogrel flag	1=Yes, 0=No
	treatment_pattern_Anti_Other_9M	[at 9 months(±1month)] Other flag	1=Yes, 0=No
	INR_measure_9M	[at 9 months(±1month)] INR flag	1=Yes, 2=No
	INR_9M	[at 9 months(±1month)] INR value	0.84, 0.85, … , 1.21, unkown=9999
	discharge_12M	discharge at12 months(±1month)	1=discharge 2=ambulatory care 3=readmission 4=none
	treatment_pattern_12M	treatment at 12 months(±1month)	1=treatment at discharge 2=maintain 3=change 4=None
	treatment_pattern_VKA_12M	[at 12 months(±1month)] VKA flag	1=Yes, 0=No
	treatment_pattern_Anti_12M	[at 12 months(±1month)] Antiplatelet flag	1=Yes, 0=No
	treatment_pattern_Anti_Asprin_12M	[at 12 months(±1month)] Aspirin flag	1=Yes, 0=No
	treatment_pattern_Anti_Clopidogrel_12M	[at 12 months(±1month)] Clopidogrel flag	1=Yes, 0=No
	treatment_pattern_Anti_Other_12M	[at 12 months(±1month)] Other flag	1=Yes, 0=No
	INR_measure_12M	[at 12 months(±1month)] INR flag	1=Yes, 2=No
	INR_12M	[at 12 months(±1month)] INR value	0.84, 0.85, … , 1.21, unkown=9999
	discharge_18M	discharge at18 months(±3months)	1=discharge 2=ambulatory care 3=readmission 4=none
	treatment_pattern_18M	treatment at 18 months(±3months)	1=treatment at discharge 2=maintain 3=change 4=None
	treatment_pattern_VKA_18M	[at 18 months(±3months)] VKA flag	1=Yes, 0=No
	treatment_pattern_Anti_18M	[at 18 months(±3months)] Antiplatelet flag	1=Yes, 0=No
	treatment_pattern_Anti_Asprin_18M	[at 18 months(±3months)] Aspirin flag	1=Yes, 0=No
	treatment_pattern_Anti_Clopidogrel_18M	[at 18 months(±3months)] Clopidogrel flag	1=Yes, 0=No
	treatment_pattern_Anti_Other_18M	[at 18 months(±3months)] Other flag	1=Yes, 0=No
	INR_measure_18M	[at 18 months(±3months)] INR flag	1=Yes, 2=No
	INR_18M	[at 18 months(±3months)] INR value	0.84, 0.85, … , 1.21, unkown=9999
	discharge_24M	discharge at24 months(±3months)	1=discharge 2=ambulatory care 3=readmission 4=none
	treatment_pattern_24M	treatment at 24 months(±3months)	1=treatment at discharge 2=maintain 3=change 4=None
	treatment_pattern_VKA_24M	[at 24 months(±3months)] VKA flag	1=Yes, 0=No
	treatment_pattern_Anti_24M	[at 24 months(±3months)] Antiplatelet flag	1=Yes, 0=No
	treatment_pattern_Anti_Asprin_24M	[at 24 months(±3months)] Aspirin flag	1=Yes, 0=No
	treatment_pattern_Anti_Clopidogrel_24M	[at 24 months(±3months)] Clopidogrel flag	1=Yes, 0=No
	treatment_pattern_Anti_Other_24M	[at 24 months(±3months)] Other flag	1=Yes, 0=No
	INR_measure_24M	[at 24 months(±3months)] INR flag	1=Yes, 2=No
	INR_24M	[at 24 months(±3months)] INR value	0.84, 0.85, … , 1.21, unkown=9999
	discharge_30M	discharge at 30 months(±3months)	1=discharge 2=ambulatory care 3=readmission 4=none
	treatment_pattern_30M	treatment at 30 months(±3months)	1=treatment at discharge 2=maintain 3=change 4=None
	treatment_pattern_VKA_30M	[at 30 months(±3months)] VKA flag	1=Yes, 0=No
	treatment_pattern_Anti_30M	[at 30 months(±3months)] Antiplatelet flag	1=Yes, 0=No
	treatment_pattern_Anti_Asprin_30M	[at 30 months(±3months)] Aspirin flag	1=Yes, 0=No
	treatment_pattern_Anti_Clopidogrel_30M	[at 30 months(±3months)] Clopidogrel flag	1=Yes, 0=No
	treatment_pattern_Anti_Other_30M	[at 30 months(±3months)] Other flag	1=Yes, 0=No
	INR_measure_30M	[at 30 months(±3months)] INR flag	1=Yes, 2=No
	INR_30M	[at 30 months(±3months)] INR value	0.84, 0.85, … , 1.21, unkown=9999
	discharge_36M	discharge at 36 months(±3months)	1=discharge 2=ambulatory care 3=readmission 4=none
	treatment_pattern_36M	treatment at 36 months(±3months)	1=treatment at discharge 2=maintain 3=change 4=None
	treatment_pattern_VKA_36M	[at 36 months(±3months)] VKA flag	1=Yes, 0=No
	treatment_pattern_Anti_36M	[at 36 months(±3months)] Antiplatelet flag	1=Yes, 0=No
	treatment_pattern_Anti_Asprin_36M	[at 36 months(±3months)] Aspirin flag	1=Yes, 0=No
	treatment_pattern_Anti_Clopidogrel_36M	[at 36 months(±3months)] Clopidogrel flag	1=Yes, 0=No
	treatment_pattern_Anti_Other_36M	[at 36 months(±3months)] Other flag	1=Yes, 0=No
	INR_measure_36M	[at 36 months(±3months)] INR flag	1=Yes, 2=No
	INR_36M	[at 36 months(±3months)] INR value	0.84, 0.85, … , 1.21, unkown=9999
	TRT	Total treatment at discharge	1= VKA and Antiplatelet combination therapy 2= VKA only 3= Antiplatelet only 4= None
	TRT_1M	[at 1 months(±2weeks)] Total treatment
	TRT_2M	[at 2 months(±2weeks)] Total treatment
	TRT_3M	[at 3 months(±1months)] Total treatment
	TRT_6M	[at 6 months(±1months)] Total treatment
	TRT_9M	[at 9 months(±1months)] Total treatment
	TRT_12M	[at 12 months(±1months)] Total treatment
	TRT_18M	[at 18 months(±3months)] Total treatment
	TRT_24M	[at 24 months(±3months)] Total treatment
	TRT_30M	[at 30 months(±3months)] Total treatment
	TRT_36M	[at 36 months(±3months)] Total treatment
	STATUS_ADMISSION	Status of Admission	1=event(admission)
	TIME_ADMISSION	Time for admission (evnet 발생까지의 시간)
	STATUS_ER	Status of ER visit	1=event(admission)
	TIME_ER	Time for ER visit (evnet 발생까지의 시간)
	STATUS_MAJOR	Status of Primary events	1=event(admission)
	TIME_MAJOR	Time for Primary events (evnet 발생까지의 시간)
	PY	person year
	LOG_PY	log (person year)
	VKAG	VKA group	1=VKA maintain 2=VKA use and stop 3=VKA no-use, afterward use 4=VKA never use
	VKA	VKA flag	1=VKA, 2=non-VKA
	MTTR	modifind TTR
	MTTRG	modified TTR group	1=POOR CONTROL 0=WELL CONTROL

## Sheet: 2. Raw Data
Gender	Age	Age_g	AGE_65	Height	Weight	BMI	Diagnosis_date	NIHSS_admission	NIHSS_discharge	change	CHADS2_Score_n	CHA2DS2_VASc_Score_n	dur	treatment_pattern	treatment_pattern_VKA	treatment_pattern_Anti	treatment_pattern_Anti_Asprin	treatment_pattern_Anti_Clopidogr	treatment_pattern_Anti_Other	INR_measure	INR	discharge_1M	treatment_pattern_1M	treatment_pattern_VKA_1M	treatment_pattern_Anti_1M	treatment_pattern_Anti_Asprin_1M	treatment_pattern_Anti_Clopid_1M	treatment_pattern_Anti_Other_1M	INR_measure_1M	INR_1M	discharge_2M	treatment_pattern_2M	treatment_pattern_VKA_2M	treatment_pattern_Anti_2M	treatment_pattern_Anti_Asprin_2M	treatment_pattern_Anti_Clopid_2M	treatment_pattern_Anti_Other_2M	INR_measure_2M	INR_2M	discharge_3M	treatment_pattern_3M	treatment_pattern_VKA_3M	treatment_pattern_Anti_3M	treatment_pattern_Anti_Asprin_3M	treatment_pattern_Anti_Clopid_3M	treatment_pattern_Anti_Other_3M	INR_measure_3M	INR_3M	discharge_6M
1	72	5	2	168	76	26.9274	2008-12	29	29	0	3	5	0	1	1	0	0	0	0	1	2.57	2	2	1	0	0	0	0	2		4		0	0	0	0	0			4		0	0	0	0	0			4
0	75	6	2	149	82	36.9353	2008-10	13	9	-4	4	6	0	1	1	0	0	0	0	1	2.31	2	2	1	0	0	0	0	1	3.22	2	2	1	0	0	0	0	1	1.27	4		0	0	0	0	0			4
1	57	2	1	172	70	23.6614	2006-11	2	2	0	4	4	0	1	1	0	0	0	0	1	2.66	4		0	0	0	0	0			2	2	1	0	0	0	0	1	1.63	4		0	0	0	0	0			2
0	73	5	2	160	61	23.8281	2006-11	14	11	-3	4	6	0	1	1	0	0	0	0	1	2.45	4		0	0	0	0	0			2	2	1	0	0	0	0	1	2.53	2	2	1	0	0	0	0	1	1.37	2
1	76	6	2	166	45	16.3304	2006-10	21	0	-21	5	7	0	1	0	1	0	1	0	2		4		0	0	0	0	0			4		0	0	0	0	0			4		0	0	0	0	0			4
1	49	1	1	173	71	23.7228	2006-10	4	2	-2	2	3	0	1	1	0	0	0	0	1	2.52	2	2	1	0	0	0	0	2		4		0	0	0	0	0			4		0	0	0	0	0			4
1	73	5	2	165	75	27.5482	2006-10	12	1	-11	3	4	0	1	1	0	0	0	0	1	2.28	2	2	1	0	0	0	0	1	2.17	2	2	1	0	0	0	0	1	2.84	2	2	1	0	0	0	0	1	2.22	2
0	75	6	2	160	60	23.4375	2006-10	2	1	-1	4	7	0	1	1	0	0	0	0	1	2.35	2	2	1	0	0	0	0	1	1.84	2	2	1	0	0	0	0	1	1.74	2	2	1	0	0	0	0	1	2.22	4
1	64	3	1	173	62	20.7157	2006-09	4	0	-4	3	3	0	1	0	1	0	1	0	2		4		0	0	0	0	0			4		0	0	0	0	0			2	2	0	1	0	1	0	2		4
1	63	3	1	178	74	23.3556	2006-08	4	3	-1	3	3	0	1	1	0	0	0	0	1	1.53	2	2	1	0	0	0	0	1	2.25	2	2	1	0	0	0	0	1	1.93	4		0	0	0	0	0			2
0	79	6	2	152	56	24.2382	2006-08	4	4	0	4	6	0	1	1	0	0	0	0	1	2.29	2	2	1	0	0	0	0	1	2.21	2	2	1	0	0	0	0	1	1.17	2	2	1	0	0	0	0	1	3.63	2
0	78	6	2	151	63	27.6304	2006-08	1	1	0	4	6	0	1	0	1	0	1	0	1	1.04	2	2	0	1	0	1	0	2		4		0	0	0	0	0			2	3	1	0	0	0	0	1	1.02	2
0	78	6	2	144	49	23.6304	2008-09	10	6	-4	4	6	0	2	0	0	0	0	0	1	2.11	4		0	0	0	0	0					0	0	0	0	0					0	0	0	0	0
0	64	3	1	150	52	23.1111	2006-07	5	3	-2	4	5	0	1	1	0	0	0	0	1	3.17	2	2	1	0	0	0	0	1	2.03	2	2	1	0	0	0	0	1	2.59	2	2	1	0	0	0	0	1	1.09	2
0	73	5	2	161	75	28.9341	2006-06	17	12	-5	3	5	0	1	1	0	0	0	0	1	2.02	4		0	0	0	0	0			2	2	1	0	0	0	0	1	2.12	2	2	1	0	0	0	0	1	2.79	2
1	47	1	1	179	75	23.4075	2006-07	99	99		3	3	0	1	1	0	0	0	0	1	1.52	2	2	1	0	0	0	0	1	1.72	4		0	0	0	0	0			4		0	0	0	0	0			4
1	74	5	2	167	72	25.8166	2006-06	19	1	-18	3	4	0	1	1	0	0	0	0	1	2.85	4		0	0	0	0	0			4		0	0	0	0	0			4		0	0	0	0	0			4
1	77	6	2	170	67	23.1834	2006-06	1	0	-1	5	6	0	1	1	0	0	0	0	1	2.15	2	2	1	0	0	0	0	1	2.28	2	2	1	0	0	0	0	1	1.58	2	2	1	0	0	0	0	1	1.78	2
1	72	5	2	171	74	25.3069	2006-05	2	1	-1	4	6	0	1	0	1	1	0	0	1	1.04	2	2	0	1	1	0	0	2		2	2	0	1	1	0	0	2		2	2	0	1	1	0	0	2		2
0	76	6	2	150	39	17.3333	2006-05	9	5	-4	5	7	0	1	1	0	0	0	0	1	3.2	2	2	1	0	0	0	0	1	1.37	4		0	0	0	0	0			4		0	0	0	0	0			4
1	75	6	2	180	62	19.1358	2006-05	23	21	-2	4	5	0	2	0	0	0	0	0	2		4		0	0	0	0	0					0	0	0	0	0					0	0	0	0	0
1	70	5	2	169	67	23.4586	2006-05	2	0	-2	3	4	0	1	1	0	0	0	0	1	2.66	2	2	1	0	0	0	0	1	2.74	4		0	0	0	0	0			4		0	0	0	0	0			2
0	75	6	2	160	59	23.0469	2006-04	16	42	26	4	6	0	2	0	0	0	0	0	2		4		0	0	0	0	0			4		0	0	0	0	0			4		0	0	0	0	0			4
0	79	6	2	145	50	23.7812	2008-10	2	2	0	3	5	0	1	1	0	0	0	0	1	2.49	2	2	1	0	0	0	0	1	2.21	4		0	0	0	0	0			4		0	0	0	0	0	1	2.23	2
0	71	5	2	161	61	23.533	2006-04	10	2	-8	2	4	0	1	1	0	0	0	0	1	1.84	4		0	0	0	0	0			4		0	0	0	0	0			2	2	1	0	0	0	0	1	1.83	2
0	70	5	2	155	56	23.3091	2006-04	6	1	-5	3	4	0	2	0	0	0	0	0	1	1.34	4		0	0	0	0	0			4		0	0	0	0	0			4		0	0	0	0	0			4
1	94	6	2	160	54	21.0938	2006-02	11	5	-6	5	6	0	1	0	1	1	0	0	2		4		0	0	0	0	0			4		0	0	0	0	0			2	2	0	1	1	0	0	2		4
1	73	5	2	167	63	22.5896	2006-03	13	10	-3	3	4	0	1	1	1	1	0	0	1	1.27	4		0	0	0	0	0			4		0	0	0	0	0			2	3	0	1	1	1	0	2		2
0	60	3	1	148	45	20.5442	2006-03	2	0	-2	3	4	0	1	1	0	0	0	0	1	2.02	2	2	1	0	0	0	0	1	1.02	2	3	0	1	1	1	0	2		4		0	0	0	0	0			2
0	75	6	2	155	43	17.898	2006-03	3	1	-2	3	5	0	1	1	0	0	0	0	1	3.71	4		0	0	0	0	0					0	0	0	0	0					0	0	0	0	0
1	74	5	2	170	65	22.4913	2005-12	18	15	-3	3	4	0	1	1	1	0	1	0	1	1.24	4		0	0	0	0	0			4		0	0	0	0	0			4		0	0	0	0	0			4
1	68	4	2	162	71	27.0538	2005-11	99	99		4	5	0	1	1	0	0	0	0	1	2.33	4		0	0	0	0	0			4		0	0	0	0	0			4		0	0	0	0	0			2
1	72	5	2	165	63	23.1405	2005-12	2	8	6	3	4	0	1	1	0	0	0	0	1	2.3	2	2	1	0	0	0	0	1	3.07	2	2	1	0	0	0	0	1	2.78	2	2	1	0	0	0	0	1	3.55	2
0	58	2	1	154	63	26.5643	2005-12	10	9	-1	3	4	0	1	1	0	0	0	0	1	2.85	2	2	1	0	0	0	0	1	4.01	2	2	1	0	0	0	0	1	1.83	2	2	1	0	0	0	0	1	2.68	2
1	62	3	1	179	70	21.847	2008-10	3	0	-3	4	4	0	1	1	0	0	0	0	1	3.38	2	2	1	0	0	0	0	1	2.93	4		0	0	0	0	0			2	2	1	0	0	0	0	1	0.93	4
1	64	3	1	168	50	17.7154	2005-11	12	6	-6	3	3	0	1	1	0	0	0	0	1	2.49	2	2	1	0	0	0	0	1	4.18	2	2	1	0	0	0	0	1	1.9	2	2	1	0	0	0	0	1	2.62	2
0	46	1	1	161	47	18.132	2005-10	5	1	-4	4	5	0	1	1	0	0	0	0	1	2.15	2	3	1	1	1	1	0	1	1.17	2	2	1	1	1	1	0	1	1.09	4		0	0	0	0	0			2
1	68	4	2	160	70	27.3438	2005-10	25	3	-22	2	3	0	1	1	0	0	0	0	1	2.75	2	2	1	0	0	0	0	1	4.11	2	2	1	0	0	0	0	1	2.01	4		0	0	0	0	0			2
1	71	5	2	165	67	24.6097	2005-09	2	2	0	5	6	0	1	0	1	0	1	0	2		2	2	0	1	0	1	0	2		2	2	0	1	0	1	0	2		2	2	0	1	0	1	0	2		2
1	86	6	2	164	68	25.2826	2005-10	9	7	-2	3	4	0	2	0	0	0	0	0	1	1.32	4		0	0	0	0	0					0	0	0	0	0					0	0	0	0	0
1	84	6	2	165	51	18.7328	2005-08	13	4	-9	4	5	0	1	0	1	1	1	0	2		2	2	0	1	1	1	0	2		4		0	0	0	0	0			2	2	0	1	1	1	0	2		2
0	73	5	2	150	48	21.3333	2005-10	4	2	-2	3	5	0	1	0	1	1	1	0	2		4		0	0	0	0	0			4		0	0	0	0	0			4		0	0	0	0	0			4
1	76	6	2	166	52	18.8707	2005-06	2	0	-2	3	4	0	1	1	0	0	0	0	1	2.6	2	2	1	0	0	0	0	1	1.65	2	2	1	0	0	0	0	1	2.34	2	2	1	0	0	0	0	1	1.62	2
1	59	2	1	176	86	27.7634	2005-06	99	99		3	3	0	1	1	0	0	0	0	1	1.49	2	2	1	0	0	0	0	1	2.21	2	2	1	0	0	0	0	1	3.06	2	2	1	0	0	0	0	1	1.77	2
0	74	5	2	155	59	24.5578	2005-06	8	8	0	2	4	0	1	1	0	0	0	0	1	1.38	2	2	1	0	0	0	0	1	2.13	4		0	0	0	0	0			2	2	1	0	0	0	0	1	2.38	2
1	63	3	1	160	82	32.0312	2008-10	7	2	-5	4	4	0	1	1	0	0	0	0	1	2.24	2	2	1	0	0	0	0	1	2.09	4		0	0	0	0	0			2	2	1	0	0	0	0	1	2.05	2
0	73	5	2	99999	99999		2005-06	3	1	-2	3	5	0	1	1	0	0	0	0	1	2.49	2	2	1	0	0	0	0	1	1.47	4		0	0	0	0	0			2	2	1	0	0	0	0	1	1.97	2
1	39	1	1	183	82	24.4857	2005-04	4	2	-2	3	3	0	1	1	0	0	0	0	1	2.1	4		0	0	0	0	0			2	2	1	0	0	0	0	1	1.09	2	2	1	0	0	0	0	1	1.76	2
0	67	4	2	155	64	26.6389	2005-05	99	99		3	5	0	1	1	0	0	0	0	1	2.41	2	2	1	0	0	0	0	1	1.63	2	2	1	0	0	0	0	1	1.08	2	2	1	0	0	0	0	1	2.33	2
1	72	5	2	180	91	28.0864	2005-04	99	99		5	6	0	1	1	0	0	0	0	1	2.82	2	2	1	0	0	0	0	1	2.48	4		0	0	0	0	0			2	2	1	0	0	0	0	1	3.02	4
0	38	1	1	163	77	28.9811	2005-05	99	99		2	3	0	1	0	1	1	1	0	2		2	2	0	1	1	1	0	2		4		0	0	0	0	0			2	2	0	1	1	1	0	2		4
1	61	3	1	178	87	27.4587	2005-03	99	99		2	2	0	1	1	0	0	0	0	1	2.66	2	2	1	0	0	0	0	1	3.1	2	2	1	0	0	0	0	1	3.34	4		0	0	0	0	0			2
0	75	6	2	153	49	20.9321	2005-03	18	16	-2	5	7	0	1	1	0	0	0	0	1	2.57	2	2	1	0	0	0	0	1	2.61	2	2	1	0	0	0	0	1	2.5	4		0	0	0	0	0			2
0	73	5	2	163	57	21.4536	2005-02	4	0	-4	2	4	0	1	1	0	0	0	0	1	2.19	2	2	1	0	0	0	0	1	3.05	2	2	1	0	0	0	0	1	2.19	4		0	0	0	0	0			2
0	69	4	2	153	63	26.9127	2005-02	99	99		4	6	0	1	1	0	0	0	0	1	2.57	4		0	0	0	0	0			2	2	1	0	0	0	0	1	1.44	4		0	0	0	0	0			2
1	65	4	2	164	64	23.7954	2005-02	99	99		2	3	0	1	1	0	0	0	0	1	1.81	2	2	1	0	0	0	0	1	2.75	4		0	0	0	0	0			2	2	1	0	0	0	0	1	2.53	2
1	75	6	2	171	60	20.5191	2008-09	17	2	-15	3	4	0	2	0	0	0	0	0	2		2	4	0	0	0	0	0	2		4		0	0	0	0	0			2	4	0	0	0	0	0	2		4
1	76	6	2	165	56	20.5693	2005-01	0	0	0	4	5	0	1	1	0	0	0	0	1	1.76	2	2	1	0	0	0	0	1	1.63	2	2	1	0	0	0	0	1	1.3	2	2	1	0	0	0	0	1	1.72	2
0	81	6	2	146	48	22.5183	2008-10	4	2	-2	4	7	0	1	1	0	0	0	0	1	1.79	2	2	1	0	0	0	0	1	1.98	4		0	0	0	0	0			2	2	1	0	0	0	0	1	1.36	2
0	72	5	2	157	68	27.5873	2008-09	4	2	-2	3	5	0	1	1	0	0	0	0	1	2.09	2	2	1	0	0	0	0	1	2.48	4		0	0	0	0	0			2	2	1	0	0	0	0	1	3.68	2
0	80	6	2	152	55	23.8054	2008-09	5	3	-2	4	6	0	1	1	1	1	0	0	1	2.66	2	3	1	0	0	0	0	1	1.63	2	3	1	1	1	0	0	1	1.79	2	2	1	1	1	0	0	1	2	2
0	60	3	1	160	50	19.5312	2008-07	2	0	-2	3	4	0	1	1	0	0	0	0	1	2.18	2	2	1	0	0	0	0	2		4		0	0	0	0	0			4		0	0	0	0	0			4
1	78	6	2	168	72	25.5102	2008-11	0	0	0	4	5	0	1	0	1	0	0	1	1	1.29	4		0	0	0	0	0			4		0	0	0	0	0			4		0	0	0	0	0			4
0	87	6	2	165	77	28.2828	2008-08	3	1	-2	4	7	0	1	1	0	0	0	0	1	2.52	3	4	0	0	0	0	0					0	0	0	0	0					0	0	0	0	0
1	75	6	2	170	70	24.2215	2008-05	10	3	-7	5	6	0	1	1	0	0	0	0	1	2.36	2	4	0	0	0	0	0	2		4		0	0	0	0	0			4		0	0	0	0	0			4
1	73	5	2	162	57	21.7192	2008-08	6	2	-4	3	4	0	1	1	0	0	0	0	1	2.6	2	2	1	0	0	0	0	1	1.43	2	2	1	0	0	0	0	1	3.43	2	2	1	0	0	0	0	1	1.68	2
0	71	5	2	156	60	24.6548	2008-07	1	1	0	3	5	0	1	1	1	0	0	1	1	2	2	3	1	0	0	0	0	1	2.58	2	2	1	0	0	0	0	1	1.4	2	2	1	0	0	0	0	1	1.04	2
1	61	3	1	175	65	21.2245	2008-07	2	0	-2	3	4	0	1	1	0	0	0	0	1	1.42	2	2	1	0	0	0	0	2		4		0	0	0	0	0			2	2	1	0	0	0	0	2		4
1	76	6	2	157	55	22.3133	2008-04	19	6	-13	5	6	0	1	1	0	0	0	0	1	3.15	4		0	0	0	0	0			4		0	0	0	0	0			4		0	0	0	0	0			4
0	81	6	2	147	50	23.1385	2008-06	8	4	-4	4	6	0	1	1	0	0	0	0	1	1.74	2	2	1	0	0	0	0	1	2.74	4		0	0	0	0	0			2	2	1	0	0	0	0	1	2.74	2
0	55	2	1	150	49	21.7778	2008-06	2	2	0	2	3	0	1	1	0	0	0	0	1	3.15	2	2	1	0	0	0	0	2		2	2	1	0	0	0	0	1	1.98	4		0	0	0	0	0			2
1	70	5	2	169	65	22.7583	2008-04	17	9	-8	3	4	0	2	0	0	0	0	0	1	1.05	4		0	0	0	0	0			4		0	0	0	0	0			4		0	0	0	0	0			4
1	81	6	2	168	67	23.7387	2008-06	8	2	-6	4	5	0	1	1	0	0	0	0	1	3.4	2	2	1	0	0	0	0	1	2.22	4		0	0	0	0	0			2	2	1	0	0	0	0	1	1.36	2
1	80	6	2	163	64	24.0882	2008-12	5	3	-2	4	5	0	1	1	0	0	0	0	1	2.58	4		0	0	0	0	0			2	2	1	0	0	0	0	1	1.36	4		0	0	0	0	0			2
0	77	6	2	155	42	17.4818	2008-04	0	0	0	5	7	0	2	0	0	0	0	0	1	1.69	4		0	0	0	0	0					0	0	0	0	0					0	0	0	0	0
0	62	3	1	166	76	27.5802	2008-04	5	2	-3	3	4	0	1	1	0	0	0	0	1	2.14	4		0	0	0	0	0			2	2	1	0	0	0	0	1	2.12	4		0	0	0	0	0			2
0	68	4	2	160	56	21.875	2008-03	11	4	-7	4	6	0	1	1	0	0	0	0	1	2.57	2	2	1	0	0	0	0	1	2.85	4		0	0	0	0	0			2	2	1	0	0	0	0	2		2
1	79	6	2	175	62	20.2449	2008-03	1	1	0	5	6	0	1	1	0	0	0	0	1	1.82	2	2	1	0	0	0	0	1	2.56	4		0	0	0	0	0			2	2	1	0	0	0	0	1	3.36	2
0	68	4	2	155	56	23.3091	2008-02	10	4	-6	4	6	0	1	1	0	0	0	0	1	2.31	4		0	0	0	0	0			2	2	1	0	0	0	0	1	1.37	2	2	1	0	0	0	0	1	1.29	2
0	85	6	2	152	52	22.5069	2008-03	2	1	-1	4	6	0	2	0	0	0	0	0	2		4		0	0	0	0	0			4		0	0	0	0	0			4		0	0	0	0	0			4
1	53	1	1	168	67	23.7387	2008-01	1	1	0	3	3	0	1	1	0	0	0	0	1	2.61	4		0	0	0	0	0			4		0	0	0	0	0			4		0	0	0	0	0			4
1	85	6	2	167	71	25.4581	2008-01	1	1	0	4	5	0	1	0	1	0	1	0	2		2	2	0	1	0	1	0	2		4		0	0	0	0	0			2	2	0	1	0	1	0	2		4
0	76	6	2	154	55	23.1911	2007-11	9	1	-8	4	6	0	1	0	1	0	1	0	2		3	3	1	0	0	0	0	1	0.98	4		0	0	0	0	0			2	2	1	0	0	0	0	2		4
0	74	5	2	154	52	21.9261	2007-12	1	0	-1	3	5	0	1	1	0	0	0	0	1	2.33	2	2	1	0	0	0	0	2		4		0	0	0	0	0			2	2	1	0	0	0	0	1	1.4	2
0	95	6	2	156	48	19.7239	2008-11	2	0	-2	3	5	0	1	1	0	0	0	0	1	2.55	4		0	0	0	0	0			4		0	0	0	0	0			4		0	0	0	0	0			4
0	80	6	2	160	64	25	2007-12	11	9	-2	4	6	0	1	1	0	0	0	0	1	1.86	2	2	1	0	0	0	0	1	2.4	4		0	0	0	0	0			4		0	0	0	0	0			4
1	81	6	2	164	50	18.5901	2007-12	4	0	-4	4	5	0	1	1	0	0	0	0	1	1.95	2	2	1	0	0	0	0	1	3.18	4		0	0	0	0	0			2	2	1	0	0	0	0	1	1.88	2
1	73	5	2	160	73	28.5156	2007-12	0	0	0	4	5	0	1	1	1	1	0	0	1	3.39	4		0	0	0	0	0			4		0	0	0	0	0			2	2	1	1	1	0	0	1	1.59	2
0	58	2	1	155	63	26.2227	2007-12	13	19	6	4	6	0	1	1	0	0	0	0	1	2.11	2	2	1	0	0	0	0	1	2.6	2	2	1	0	0	0	0	1	2.13	2	2	1	0	0	0	0	1	6.81	2
1	69	4	2	170	48	16.609	2007-12	17	14	-3	4	6	0	2	0	0	0	0	0	1	1.16	4		0	0	0	0	0			4		0	0	0	0	0			4		0	0	0	0	0			4
1	54	1	1	165	64	23.5078	2007-12	2	2	0	4	4	0	1	1	0	0	0	0	1	3.22	2	2	1	0	0	0	0	1	2.03	4		0	0	0	0	0			2	2	1	0	0	0	0	2		2
1	61	3	1	175	79	25.7959	2007-11	15	8	-7	3	3	0	1	0	1	1	0	0	1	0.93	2	3	1	0	0	0	0	2		4		0	0	0	0	0			4		0	0	0	0	0			4
1	87	6	2	170	67	23.1834	2007-11	20	99		5	6	0	1	1	1	0	0	1	1	2.86	2	2	1	1	0	0	0	2		4		0	0	0	0	0			4		0	0	0	0	0			4
1	50	1	1	170	80	27.6817	2007-11	0	0	0	4	4	0	1	1	0	0	0	0	1	2.35	2	2	1	0	0	0	0	1	2.17	4		0	0	0	0	0			2	2	1	0	0	0	0	1	1.67	4
1	83	6	2	163	69	25.9701	2007-11	13	5	-8	4	5	0	1	1	1	1	0	0	1	1.9	2	2	1	1	1	0	0	1	1.44	4		0	0	0	0	0			2	2	1	1	1	0	0	1	1.48	2
1	96	6	2	170	50	17.301	2008-11	7	1	-6	4	6	0	2	0	0	0	0	0	1	1.37	4		0	0	0	0	0					0	0	0	0	0					0	0	0	0	0
0	69	4	2	158	55	22.0317	2007-11	5	3	-2	4	6	0	1	1	0	0	0	0	1	2.36	2	2	1	0	0	0	0	1	1.25	2	2	1	0	0	0	0	1	1.72	2	2	1	0	0	0	0	1	1.7	2
0	60	3	1	156	51	20.9566	2007-10	6	1	-5	2	3	0	1	1	0	0	0	0	1	2.18	2	2	1	0	0	0	0	1	2.77	2	2	1	0	0	0	0	1	1.98	2	2	1	0	0	0	0	1	2.12	2
1	76	6	2	175	60	19.5918	2007-10	5	3	-2	4	5	0	1	1	0	0	0	0	1	3.15	2	2	1	0	0	0	0	1	2.24	4		0	0	0	0	0			4		0	0	0	0	0			4
1	48	1	1	171	67	22.913	2007-09	5	1	-4	2	3	0	1	1	0	0	0	0	1	1.96	2	2	1	0	0	0	0	1	2.21	2	2	1	0	0	0	0	1	1.8	4		0	0	0	0	0			2
1	56	2	1	172	69	23.3234	2007-09	3	1	-2	3	3	0	1	1	0	0	0	0	1	2.18	2	2	1	0	0	0	0	1	5.02	4		0	0	0	0	0			4		0	0	0	0	0			4
0	73	5	2	156	63	25.8876	2007-07	1	1	0	4	7	0	1	1	1	0	1	0	1	2.89	2	2	1	1	0	1	0	2		4		0	0	0	0	0			4		0	0	0	0	0			4
1	87	6	2	160	56	21.875	2007-08	17	14	-3	4	5	0	1	0	1	0	1	1	1	1.1	4		0	0	0	0	0			4		0	0	0	0	0			4		0	0	0	0	0			4
1	61	3	1	170	78	26.9896	2007-08	8	1	-7	4	4	0	1	1	0	0	0	0	1	2.13	2	2	1	0	0	0	0	1	2.07	4		0	0	0	0	0			2	2	1	0	0	0	0	1	1.14	2
0	81	6	2	150	65	28.8889	2007-05	11	3	-8	4	6	0	1	1	0	0	0	0	1	2.49	4		0	0	0	0	0			4		0	0	0	0	0			4		0	0	0	0	0			2
1	66	4	2	167	72	25.8166	2007-08	23	16	-7	2	3	0	1	1	0	0	0	0	1	2.11	2	2	1	0	0	0	0	1	2.58	4		0	0	0	0	0			4		0	0	0	0	0			2
1	77	6	2	158	60	24.0346	2008-11	21	35	14	6	8	0	1	1	1	1	0	0	1	1.57	2	2	1	1	1	0	0	1	1.99	2	2	1	1	1	0	0	1	1.92	2	2	1	1	1	0	0	1	2.69	2
1	90	6	2	150	49	21.7778	2007-07	1	0	-1	3	4	0	1	0	1	1	0	0	2		4		0	0	0	0	0			4		0	0	0	0	0			4		0	0	0	0	0			4
0	68	4	2	155	47	19.563	2007-07	2	1	-1	3	5	0	1	1	0	0	0	0	1	2.56	2	2	1	0	0	0	0	1	1.82	2	2	1	0	0	0	0	1	1.98	2	2	1	0	0	0	0	1	1.96	4
0	74	5	2	150	43	19.1111	2007-04	0	0	0	2	5	0	1	0	1	1	0	0	2		4		0	0	0	0	0			2	2	0	1	1	0	0	2		4		0	0	0	0	0			4
1	60	3	1	164	67	24.9108	2007-05	7	27	20	2	2	0	1	1	0	0	0	0	1	2.16	2	2	1	0	0	0	0	1	1.99	4		0	0	0	0	0			2	2	1	0	0	0	0	1	2.37	2
1	75	6	2	165	58	21.3039	2007-04	9	7	-2	4	5	0	1	1	0	0	0	0	1	1.94	2	2	1	0	0	0	0	1	1.13	2	2	1	0	0	0	0	1	2.3	2	2	1	0	0	0	0	1	1.43	2
1	66	4	2	169	73	25.5593	2007-04	22	11	-11	3	4	0	1	1	0	0	0	0	1	2.4	4		0	0	0	0	0			4		0	0	0	0	0			2	2	1	0	0	0	0	1	1.76	2
0	75	6	2	158	60	24.0346	2007-04	2	0	-2	5	7	0	1	1	0	0	0	0	1	2.38	2	2	1	0	0	0	0	1	1.9	2	2	1	0	0	0	0	1	1.52	4		0	0	0	0	0			2
1	62	3	1	167	59	21.1553	2007-04	16	12	-4	3	3	0	1	1	0	0	0	0	1	2.22	2	2	1	0	0	0	0	1	1.45	4		0	0	0	0	0			2	2	1	0	0	0	0	1	2.25	2
0	66	4	2	158	60	24.0346	2007-01	0	0	0	3	5	0	1	1	0	0	0	0	1	2.89	4		0	0	0	0	0			4		0	0	0	0	0			4		0	0	0	0	0			4
0	70	5	2	154	62	26.1427	2007-04	16	12	-4	2	4	0	1	1	0	0	0	0	1	2.25	4		0	0	0	0	0			4		0	0	0	0	0			4		0	0	0	0	0			4
1	47	1	1	170	52	17.9931	2008-11	27	25	-2	4	4	0	1	1	0	0	0	0	1	2.79	2	2	1	0	0	0	0	1	2.26	4		0	0	0	0	0			2	2	1	0	0	0	0	1	2.31	2
1	56	2	1	171	80	27.3588	2007-04	2	1	-1	3	3	0	1	1	0	0	0	0	1	2.46	2	2	1	0	0	0	0	1	2.1	4		0	0	0	0	0			2	2	1	0	0	0	0	1	2.68	2
1	64	3	1	172	60	20.2812	2007-03	17	8	-9	4	4	0	1	1	0	0	0	0	1	3.47	4		0	0	0	0	0			4		0	0	0	0	0			4		0	0	0	0	0			4
0	71	5	2	150	53	23.5556	2007-03	19	24	5	4	6	0	1	1	0	0	0	0	1	2.13	3	2	1	0	0	0	0	1	2.85	2	2	1	0	0	0	0	1	4.4	2	2	1	0	0	0	0	1	3.74	2
0	78	6	2	167	57	20.4382	2007-02	9	5	-4	4	6	0	1	1	0	0	0	0	1	1.87	4		0	0	0	0	0			4		0	0	0	0	0			4		0	0	0	0	0			4
0	63	3	1	150	52	23.1111	2007-02	3	3	0	3	4	0	1	0	1	1	1	0	1	1.09	2	2	0	1	1	1	0	2		4		0	0	0	0	0			2	2	0	1	1	1	0	2		4
1	84	6	2	165	53	19.4674	2006-11	7	4	-3	3	4	0	1	1	0	0	0	0	1	2.53	4		0	0	0	0	0			4		0	0	0	0	0			4		0	0	0	0	0			4
1	66	4	2	170	65	22.4913	2007-01	1	0	-1	3	4	0	1	1	0	0	0	0	1	2.42	2	2	1	0	0	0	0	1	2.02	2	2	1	0	0	0	0	1	2.44	4		0	0	0	0	0			4
0	51	1	1	153	86.9	37.1225	2007-02	5	2	-3	3	5	0	1	1	1	1	0	0	1	2.49	4		0	0	0	0	0			4		0	0	0	0	0			2	3	0	1	1	0	0	2		2
1	59	2	1	175	94	30.6939	2007-01	5	0	-5	4	4	0	1	1	0	0	0	0	1	1.89	4		0	0	0	0	0			4		0	0	0	0	0			2	2	1	0	0	0	0	1	3.52	2
1	76	6	2	166	68	24.677	2007-02	7	0	-7	4	5	0	1	1	0	0	0	0	1	2.25	2	2	1	0	0	0	0	1	3.87	2	2	1	0	0	0	0	1	1.42	2	2	1	0	0	0	0	1	1.22	4
1	73	5	2	165	62	22.7732	2008-10	8	1	-7	4	5	0	1	1	0	0	0	0	1	1.61	2	2	1	0	0	0	0	1	1.43	4		0	0	0	0	0			2	2	1	0	0	0	0	1	1.48	2
1	67	4	2	181	80	24.4193	2007-01	28	22	-6	3	4	0	1	0	1	1	0	0	2		4		0	0	0	0	0			2	2	0	1	1	0	0	2		2	2	0	1	1	0	0	2		4
0	78	6	2	149	54	24.3232	2007-01	9	3	-6	5	7	0	1	1	0	0	0	0	1	2.09	2	2	1	0	0	0	0	1	1.65	4		0	0	0	0	0			4		0	0	0	0	0			2
1	73	5	2	99999	71		2007-01	1	0	-1	4	5	0	1	1	0	0	0	0	1	2.26	4		0	0	0	0	0			4		0	0	0	0	0			4		0	0	0	0	0			4
1	59	2	1	168	61	21.6128	2007-01	16	7	-9	3	3	0	1	1	0	0	0	0	1	2.13	4		0	0	0	0	0			4		0	0	0	0	0			4		0	0	0	0	0			4
1	78	6	2	172	55	18.5911	2007-01	20	25	5	5	6	0	1	1	1	1	0	0	1	2.1	2	2	1	1	1	0	0	1	1.23	4		0	0	0	0	0			2	3	1	0	0	0	0	1	0.99	2
0	62	3	1	158	58	23.2335	2006-12	2	0	-2	3	5	0	1	1	0	0	0	0	1	2.43	2	2	1	0	0	0	0	1	2.97	4		0	0	0	0	0			2	2	1	0	0	0	0	1	2.09	2
1	68	4	2	169	68	23.8087	2007-01	1	0	-1	2	3	0	1	1	0	0	0	0	1	2.72	2	2	1	0	0	0	0	1	1.03	4		0	0	0	0	0			2	2	1	0	0	0	0	1	1.51	2
0	90	6	2	142	38	18.8455	2007-01	23	6	-17	4	6	0	1	0	1	1	1	0	1	1.06	4		0	0	0	0	0			4		0	0	0	0	0			4		0	0	0	0	0			4
0	66	4	2	150	35	15.5556	2006-11	24	28	4	3	5	0	1	1	0	0	0	0	1	1.84	2	2	1	0	0	0	0	2		4		0	0	0	0	0			4		0	0	0	0	0			4
0	68	4	2	160	65	25.3906	2007-01	2	0	-2	3	5	0	1	1	0	0	0	0	1	1.76	2	2	1	0	0	0	0	1	1.83	4		0	0	0	0	0			2	2	1	0	0	0	0	1	1.12	2
1	77	6	2	164	56	20.8209	2008-11	20	20	0	4	5	0	1	1	0	0	0	0	1	1.85	2	2	1	0	0	0	0	1	1.99	2	2	1	0	0	0	0	1	3.02	4		0	0	0	0	0			4
1	74	5	2	170	68	23.5294	2007-01	1	0	-1	3	4	0	1	1	0	0	0	0	1	2.57	2	2	1	0	0	0	0	1	1.62	2	2	1	0	0	0	0	1	1.3	2	2	1	0	0	0	0	1	1.39	2
0	68	4	2	152	55	23.8054	2007-01	16	7	-9	4	6	0	1	1	1	1	0	0	1	2.11	4		0	0	0	0	0			2	3	1	0	0	0	0	1	2.05	4		0	0	0	0	0			4
1	66	4	2	173	70	23.3887	2006-12	13	2	-11	2	3	0	1	1	1	1	1	0	1	2.15	2	3	1	0	0	0	0	1	2.19	2	2	1	0	0	0	0	1	1.59	2	2	1	0	0	0	0	1	1.54	2
1	66	4	2	168	86	30.4705	2006-12	11	11	0	3	4	0	1	1	0	0	0	0	1	1.95	2	2	1	0	0	0	0	1	1.94	4		0	0	0	0	0			2	2	1	0	0	0	0	1	1.65	2
0	70	5	2	156	63	25.8876	2006-11	5	0	-5	3	5	0	1	1	0	0	0	0	1	2.22	2	2	1	0	0	0	0	1	1.36	4		0	0	0	0	0			2	2	1	0	0	0	0	1	4.69	2
1	70	5	2	172	73	24.6755	2006-12	3	0	-3	4	6	0	1	1	0	0	0	0	1	2.44	2	2	1	0	0	0	0	1	2.23	4		0	0	0	0	0			2	2	1	0	0	0	0	1	2.29	2
1	70	5	2	167	63	22.5896	2006-12	4	1	-3	4	6	0	1	1	1	1	0	0	1	3.66	2	2	1	1	1	0	0	1	1.94	4		0	0	0	0	0			2	3	1	1	0	1	0	1	1.68	2
0	76	6	2	150	56	24.8889	2006-10	4	4	0	4	6	0	1	1	0	0	0	0	1	1.96	4		0	0	0	0	0			4		0	0	0	0	0			4		0	0	0	0	0			4
1	62	3	1	168	63	22.3214	2006-12	2	2	0	3	3	0	1	1	0	0	0	0	1	2.22	2	2	1	0	0	0	0	1	3.15	4		0	0	0	0	0			2	2	1	0	0	0	0	1	2.9	2
0	82	6	2	145	42	19.9762	2006-12	4	3	-1	4	6	0	1	1	0	0	0	0	2		4		0	0	0	0	0					0	0	0	0	0					0	0	0	0	0
0	61	3	1	157	50	20.2848	2008-11	17	99		4	5	0	1	0	1	1	1	0	1	1	2	2	0	1	1	1	0	1	1	2	2	0	1	1	1	0	2		2	3	0	1	1	0	0	2		2
0	64	3	1	167	59	21.1553	2008-08	7	99		4	5	0	1	1	0	0	0	0	1	2.64	2	2	1	0	0	0	0	1	1.5	2	2	1	0	0	0	0	1	3.36	2	2	1	0	0	0	0	1	2.75	2
1	63	3	1	169	64	22.4082	2003-11	99	99		5	6	0	1	1	0	0	0	0	1	2.64	2	2	1	0	0	0	0	2		2	2	1	0	0	0	0	1	1.57	2	2	1	0	0	0	0	2		2
1	73	5	2	165	62	22.7732	2003-11	99	99		3	4	0	1	1	0	0	0	0	1	3.82	2	2	1	0	0	0	0	1	2.63	2	4	0	0	0	0	0	2		2	3	0	1	0	1	0	2		2
0	84	6	2	140	36	18.3673	2003-10	99	99		3	5	0	1	1	1	1	0	0	1	0.96	2	2	1	1	1	0	0	1	1.03	2	2	1	1	1	0	0	2		2	2	1	1	1	0	0	2		2
1	60	3	1	156	59	24.2439	2003-10	99	99		3	3	0	1	1	0	0	0	0	1	2.22	2	2	1	0	0	0	0	1	1.08	2	2	1	0	0	0	0	1	2.63	2	2	1	0	0	0	0	1	3.03	2
1	45	1	1	99999	74		2003-07	14	99		2	2	0	2	0	0	0	0	0	2		2	3	0	1	1	0	0	2		4		0	0	0	0	0			4		0	0	0	0	0			4
1	62	3	1	165	75	27.5482	2003-09	24	21	-3	3	3	0	2	0	0	0	0	0	1	1.05	4		0	0	0	0	0			4		0	0	0	0	0			4		0	0	0	0	0			4
1	72	5	2	156	55	22.6003	2003-09	99	99		4	5	0	1	1	0	0	0	0	1	2.02	2	2	1	0	0	0	0	1	6.39	2	2	1	0	0	0	0	1	3.75	2	2	1	0	0	0	0	1	0.99	2
0	79	6	2	148	50	22.8269	2003-07	99	99		6	8	0	1	0	1	1	1	0	2		2	2	0	1	1	1	0	2		4		0	0	0	0	0			2	2	0	1	1	1	0	2		2
0	42	1	1	158	60	24.0346	2003-07	7	99		3	4	0	1	1	0	0	0	0	1	2.98	2	2	1	0	0	0	0	1	2.07	2	2	1	0	0	0	0	1	2.54	2	2	1	0	0	0	0	1	2.2	4
0	84	6	2	158	49	19.6283	2003-05	99	99		3	5	0	1	1	1	1	0	0	1	1.06	2	2	1	1	1	0	0	1	1.1	4		0	0	0	0	0			4		0	0	0	0	0			4
0	81	6	2	154	52	21.9261	2008-08	20	99		6	9	0	1	1	0	0	0	0	1	2.2	2	2	1	0	0	0	0	2		2	2	1	0	0	0	0	1	1.71	4		0	0	0	0	0			2
0	70	5	2	148	37	16.8919	2003-03	99	99		5	7	0	1	1	1	1	1	0	1	2.33	4		0	0	0	0	0			2	3	1	0	0	0	0	1	1.24	2	4	0	0	0	0	0	1	2.03	2
0	65	4	2	165	56	20.5693	2003-03	99	99		3	5	0	1	1	0	0	0	0	1	2.1	2	2	1	0	0	0	0	2		2	2	1	0	0	0	0	1	1.15	2	2	1	0	0	0	0	1	1.6	2
1	58	2	1	160	99999		2003-01	99	99		4	4	0	1	1	0	0	0	0	1	2.42	2	2	1	0	0	0	0	1	3.81	4		0	0	0	0	0			4		0	0	0	0	0			4
1	67	4	2	160	75	29.2969	2003-01	5	0	-5	3	4	0	1	1	0	0	0	0	1	1.62	4		0	0	0	0	0			2	2	1	0	0	0	0	1	1.36	2	2	1	0	0	0	0	1	1.59	4
1	60	3	1	167	60	21.5139	2002-12	99	99		3	3	0	1	1	0	0	0	0	1	2.73	2	2	1	0	0	0	0	1	2.03	2	2	1	0	0	0	0	1	2.55	2	2	1	0	0	0	0	1	1.92	2
1	63	3	1	167	56	20.0796	2002-12	3	99		4	4	0	1	1	0	0	0	0	1	1.97	2	2	1	0	0	0	0	2		2	2	1	0	0	0	0	2		2	2	1	0	0	0	0	1	1.1	2
0	68	4	2	156	56	23.0112	2002-10	99	99		5	7	0	1	0	1	1	0	0	1	1.09	2	3	0	1	0	1	0	2		2	2	0	1	0	1	0	2		4		0	0	0	0	0			4
1	70	5	2	99999	99999		2002-10	21	99		2	3	0	1	1	0	0	0	0	1	2.58	2	2	1	0	0	0	0	1	2.59	2	2	1	0	0	0	0	1	2.1	2	2	1	0	0	0	0	1	1.8	2
1	43	1	1	99999	99999		2002-10	99	99		4	4	0	1	1	0	0	0	0	1	2.23	2	2	1	0	0	0	0	1	1.55	2	2	1	0	0	0	0	1	3.51	2	2	1	0	0	0	0	1	1.6	2
0	68	4	2	153	54	23.0681	2002-10	99	99		2	4	0	1	1	0	0	0	0	1	2.53	2	2	1	0	0	0	0	1	1.31	2	2	1	0	0	0	0	1	1.57	2	2	1	0	0	0	0	1	1.56	2
1	50	1	1	173	77	25.7276	2008-08	3	99		2	2	0	1	1	0	0	0	0	1	2.43	2	2	1	0	0	0	0	1	1.34	2	2	1	0	0	0	0	1	1.45	4		0	0	0	0	0			2
0	92	6	2	99999	99999		2002-08	7	99		3	5	0	1	0	1	1	0	0	1	1.05	2	3	0	1	0	0	0	2		4		0	0	0	0	0			4		0	0	0	0	0			4
1	60	3	1	99999	99999		2002-08	99	99		3	3	0	1	1	0	0	0	0	1	2.34	4		0	0	0	0	0			2	2	1	0	0	0	0	1	1.43	2	2	1	0	0	0	0	1	2.33	2
0	79	6	2	153	46	19.6506	2002-08	15	99		5	7	0	1	1	0	0	0	0	1	2.37	2	2	1	0	0	0	0	1	2.3	2	4	0	0	0	0	0	1	2.85	2	4	0	0	0	0	0	2		2
0	80	6	2	155	58	24.1415	2002-08	99	99		5	7	0	1	1	0	0	0	0	1	2.87	2	4	0	0	0	0	0	2				0	0	0	0	0					0	0	0	0	0
1	75	6	2	172	67	22.6474	2002-06	21	99		6	7	0	1	1	0	0	0	0	1	2.92	4		0	0	0	0	0			4		0	0	0	0	0			4		0	0	0	0	0			4
0	80	6	2	150	49	21.7778	2002-06	99	99		4	6	0	1	1	0	0	0	0	1	2.99	2	2	1	0	0	0	0	1	1.98	2	2	1	0	0	0	0	1	2.39	2	2	1	0	0	0	0	1	1.58	2
1	61	3	1	166	77	27.9431	2002-05	99	99		3	3	0	1	1	0	0	0	0	1	1.98	2	3	1	1	1	0	0	1	1.94	2	2	1	1	1	0	0	1	2.57	2	2	1	1	1	0	0	1	1.86	2
0	88	6	2	151	58	25.4375	2002-05	99	99		4	6	0	1	0	1	1	0	0	1	1	2	2	0	1	1	0	0	2		2	2	0	1	1	0	0	2		4		0	0	0	0	0			4
1	62	3	1	166	59	21.4109	2002-04	8	99		3	3	0	1	1	0	0	0	0	1	2.54	2	2	1	0	0	0	0	1	3.07	4		0	0	0	0	0			2	2	1	0	0	0	0	1	2.01	2
0	58	2	1	155	65	27.0552	2002-04	4	99		3	4	0	1	1	0	0	0	0	1	2.13	2	2	1	0	0	0	0	1	1.31	2	2	1	0	0	0	0	1	1.22	2	2	1	0	0	0	0	1	1.73	2
0	59	2	1	159	55	21.7555	2008-08	99	99		3	4	0	1	1	0	0	0	0	1	1.25	2	2	1	0	0	0	0	1	1.95	4		0	0	0	0	0			2	2	1	0	0	0	0	1	1.41	2
1	69	4	2	165	50	18.3655	2002-03	20	99		2	3	0	1	0	1	1	0	0	1	1.27	2	2	0	1	1	0	0	2		2	2	0	1	1	0	0	2		4		0	0	0	0	0			4
0	83	6	2	155	52	21.6441	2002-01	13	99		4	6	0	1	0	1	1	0	0	2		2	3	0	1	0	1	0	2		2	2	0	1	0	1	0	2		2	2	0	1	0	1	0	2		2
1	61	3	1	187	92	26.309	2002-01	2	99		2	2	0	1	1	0	0	0	0	1	1.76	2	2	1	0	0	0	0	1	1.58	2	2	1	0	0	0	0	1	1.42	2	2	1	0	0	0	0	1	2.12	2
1	81	6	2	168	79	27.9904	2001-12	3	99		4	5	0	1	1	0	0	0	0	1	2.71	2	2	1	0	0	0	0	1	2.19	2	2	1	0	0	0	0	1	1.86	2	2	1	0	0	0	0	1	1.57	2
0	85	6	2	154	48	20.2395	2001-12	99	99		3	5	0	1	1	0	0	0	0	1	2.91	2	2	1	0	0	0	0	1	3.18	2	2	1	0	0	0	0	1	1.04	2	2	1	0	0	0	0	1	3.37	2
1	53	1	1	162	58	22.1003	2001-12	99	99		3	3	0	1	1	0	0	0	0	1	1.82	2	2	1	0	0	0	0	2		2	2	1	0	0	0	0	1	1.41	2	2	1	0	0	0	0	2		2
0	58	2	1	154	59	24.8777	2001-10	99	99		4	6	0	1	1	0	0	0	0	1	1.61	2	2	1	0	0	0	0	2		2	2	1	0	0	0	0	1	1.99	2	2	1	0	0	0	0	1	2.32	2
1	72	5	2	169	60	21.0077	2001-10	99	99		3	4	0	1	1	0	0	0	0	1	2.69	4		0	0	0	0	0			4		0	0	0	0	0			4		0	0	0	0	0			4
1	67	4	2	164	60	22.3082	2001-09	99	99		2	3	0	1	1	0	0	0	0	1	2.39	2	2	1	0	0	0	0	1	1.04	2	4	0	0	0	0	0	2		2	3	1	0	0	0	0	1	1.47	2
1	75	6	2	99999	64		2001-07	99	99		5	7	0	1	0	1	1	0	0	2		2	4	0	0	0	0	0	2				0	0	0	0	0					0	0	0	0	0
1	72	5	2	173	69	23.0546	2008-07	99	99		3	4	0	1	1	0	0	0	0	1	3.01	2	2	1	0	0	0	0	1	2.37	4		0	0	0	0	0			2	2	1	0	0	0	0	1	2	2
0	77	6	2	146	49	22.9874	2001-09	99	99		4	6	0	1	1	0	0	0	0	1	3.23	4		0	0	0	0	0			4		0	0	0	0	0			4		0	0	0	0	0			2
1	57	2	1	164	65	24.1672	2001-09	99	99		2	3	0	1	1	0	0	0	0	1	1.75	2	2	1	0	0	0	0	1	2.75	2	3	1	1	1	0	0	1	2.17	2	3	1	0	0	0	0	1	1.63	2
1	83	6	2	169	71	24.8591	2001-08	99	99		3	4	0	1	1	0	0	0	0	1	1.03	2	2	1	0	0	0	0	1	1.73	2	2	1	0	0	0	0	1	1.81	2	2	1	0	0	0	0	1	2.22	2
1	73	5	2	165	69	25.3444	2001-08	99	99		3	4	0	1	1	0	0	0	0	1	2.28	4		0	0	0	0	0			4		0	0	0	0	0			2	4	0	0	0	0	0	2		4
1	40	1	1	99999	47		2001-08	99	99		3	3	0	1	1	0	0	0	0	1	1.91	2	2	1	0	0	0	0	1	1.38	2	2	1	0	0	0	0	1	1.63	2	2	1	0	0	0	0	1	1.13	2
1	71	5	2	162	62	23.6244	2001-08	99	99		3	4	0	1	1	0	0	0	0	1	1.63	2	4	0	0	0	0	0	2		2	4	0	0	0	0	0	2		2	4	0	0	0	0	0	2		4
1	78	6	2	176	55	17.7557	2001-06	99	99		5	6	0	2	0	0	0	0	0	1	1	2	3	0	1	0	0	0	2		2	2	0	1	0	0	1	2		2	2	0	1	0	0	1	2		2
1	74	5	2	99999	53		2001-07	99	99		3	4	0	1	1	0	0	0	0	1	2.14	2	2	1	0	0	0	0	1	1.18	2	2	1	0	0	0	0	1	1.99	2	2	1	0	0	0	0	1	1.83	2
1	68	4	2	164	53	19.7055	2001-06	99	99		2	3	0	1	1	1	1	0	0	1	2.18	2	3	1	0	0	0	0	1	2.13	2	2	1	0	0	0	0	2		2	2	1	0	0	0	0	1	2.76	2
1	62	3	1	169	57	19.9573	2001-06	99	99		3	3	0	1	1	0	0	0	0	1	1.83	2	2	1	0	0	0	0	1	3.59	2	2	1	0	0	0	0	1	1.68	2	2	1	0	0	0	0	2		2
0	88	6	2	150	42	18.6667	2008-06	11	99		3	5	0	1	0	1	1	0	0	2		2	2	0	1	1	0	0	2		4		0	0	0	0	0			4		0	0	0	0	0			4
1	75	6	2	99999	99999		2001-06	99	99		4	5	0	1	1	0	0	0	0	1	2.21	2	2	1	0	0	0	0	1	2.81	2	2	1	0	0	0	0	2		2	2	1	0	0	0	0	1	1.31	2
1	86	6	2	170	66	22.8374	2008-06	16	99		4	5	0	1	0	1	1	0	0	1	1.53	2	2	0	1	1	0	0	1	1.09	2	2	0	1	1	0	0	2		2	4	0	0	0	0	0	2
1	84	6	2	164	64	23.7954	2008-06	99	99		4	5	0	1	1	0	0	0	0	1	3.19	2	2	1	0	0	0	0	1	3.95	2	2	1	0	0	0	0	1	2.17	2	2	1	0	0	0	0	1	1.95	2
0	73	5	2	160	50	19.5312	2008-05	99	99		3	5	0	1	1	0	0	0	0	1	2.3	2	2	1	0	0	0	0	1	2.32	2	2	1	0	0	0	0	1	1.9	2	2	1	0	0	0	0	1	3.15	2
0	87	6	2	150	34	15.1111	2007-11	22	99		4	6	0	2	0	0	0	0	0	1	1	2	4	0	0	0	0	0	1	1	2	4	0	0	0	0	0	1	1	4		0	0	0	0	0			4
0	73	5	2	160	70	27.3438	2008-12	99	0		3	5	0	1	0	1	1	1	0	1	1.07	2	2	0	1	1	1	0	2		2	2	0	1	1	1	0	2		2	2	0	1	1	1	0	2		2
0	64	3	1	158	64	25.6369	2008-05	99	99		4	5	0	1	0	1	1	1	0	1	1	2	3	0	1	0	1	0	2		2	2	0	1	0	1	0	1	1	4		0	0	0	0	0			2
0	85	6	2	152	59	25.5367	2008-04	99	99		3	5	0	1	1	0	0	0	0	1	2.25	2	2	1	0	0	0	0	2		2	2	1	0	0	0	0	2		2	3	0	1	1	0	0	2		4
0	87	6	2	160	50	19.5312	2008-04	18	99		4	6	0	1	0	1	1	0	0	1	1	2	2	0	1	1	0	0	2		4		0	0	0	0	0			2	4	0	0	0	0	0	1	1.08	4
0	89	6	2	145	99999		2008-04	2	1	-1	4	6	0	1	1	0	0	0	0	1	3.24	2	2	1	0	0	0	0	1	2.16	4		0	0	0	0	0			2	2	1	0	0	0	0	1	2.62	2
0	75	6	2	143	55	26.8962	2008-04	2	1	-1	4	6	0	1	1	0	0	0	0	1	2.11	2	2	1	0	0	0	0	1	2.06	2	2	1	0	0	0	0	1	3.22	2	2	1	0	0	0	0	1	4.05	2
0	81	6	2	148	71	32.4142	2008-02	9	99		3	5	0	1	0	1	1	0	0	2		2	2	0	1	1	0	0	2		2	2	0	1	1	0	0	2		2	2	0	1	1	0	0	2		2
0	53	1	1	155	57	23.7253	2008-01	20	99		3	4	0	1	1	0	0	0	0	1	2.07	4		0	0	0	0	0			4		0	0	0	0	0			2	2	1	0	0	0	0	2		2
1	65	4	2	172	66	22.3094	2008-01	14	10	-4	3	3	0	1	1	0	0	0	0	1	1.64	2	2	1	0	0	0	0	1	1.67	2	2	1	0	0	0	0	1	1.31	2	2	1	0	0	0	0	1	2.91	2
1	87	6	2	164	48	17.8465	2008-01	99	99		6	7	0	1	0	1	1	1	0	1	1.08	4		0	0	0	0	0			4		0	0	0	0	0			2	4	0	0	0	0	0	1	1.12	4
0	85	6	2	164	52	19.3337	2008-01	15	99		6	8	0	1	1	0	0	0	0	1	1.7	2	3	0	1	1	0	0	1	1.15	2	2	0	1	1	0	0	2		2	2	0	1	1	0	0	2		4
1	78	6	2	168	70.5	24.9787	2008-11	8	99		4	5	0	1	1	0	0	0	0	1	1	2	2	1	0	0	0	0	1	2.08	4		0	0	0	0	0			4		0	0	0	0	0			4
0	94	6	2	150	42	18.6667	2007-12	99	99		3	5	0	1	0	1	1	0	0	1	1	4		0	0	0	0	0			2	2	0	1	1	0	0	2		4		0	0	0	0	0			4
1	65	4	2	163	58	21.83	2008-01	7	99		3	4	0	1	1	0	0	0	0	1	2.7	2	2	1	0	0	0	0	1	1.66	2	2	1	0	0	0	0	1	2.22	2	2	1	0	0	0	0	1	1.53	2
0	87	6	2	158	62	24.8358	2007-12	99	99		5	7	0	1	0	1	1	0	0	2		4		0	0	0	0	0			2	2	0	1	1	0	0	2		4		0	0	0	0	0			2
0	83	6	2	99999	41		2007-12	99	99		5	7	0	1	0	1	1	0	0	1	1.03	2	3	0	1	0	1	0	2		4		0	0	0	0	0			4		0	0	0	0	0			4
1	53	1	1	174	74	24.4418	2007-12	99	99		3	3	0	1	1	0	0	0	0	1	1.89	2	2	1	0	0	0	0	1	1.43	2	2	1	0	0	0	0	1	1.71	2	2	1	0	0	0	0	1	2.08	2
0	77	6	2	153	71	30.3302	2007-11	5	99		5	7	0	1	1	0	0	0	0	1	2.73	2	2	1	0	0	0	0	1	1	2	2	1	0	0	0	0	2		2	2	1	0	0	0	0	2		2
0	78	6	2	148	46	21.0007	2007-11	99	99		3	5	0	1	1	0	0	0	0	1	3.1	4		0	0	0	0	0			2	2	1	0	0	0	0	1	1.29	2	4	0	0	0	0	0	2		4
1	75	6	2	162	58	22.1003	2007-11	99	99		4	5	0	1	1	0	0	0	0	1	2.17	2	2	1	0	0	0	0	1	2.71	2	2	1	0	0	0	0	1	3.08	2	2	1	0	0	0	0	1	3.27	2
0	78	6	2	157	44	17.8506	2007-10	99	99		4	6	0	1	1	0	0	0	0	1	2.86	2	3	1	1	1	0	0	1	2.24	2	3	0	1	1	0	0	2		4		0	0	0	0	0			2
1	66	4	2	160	61	23.8281	2007-09	99	99		2	3	0	1	1	0	0	0	0	1	1.75	2	2	1	0	0	0	0	1	2.08	4		0	0	0	0	0			2	2	1	0	0	0	0	2		2
0	72	5	2	146	33.3	15.6221	2008-11	20	20	0	4	6	0	1	0	1	1	0	0	1	1.15	2	2	0	1	1	0	0	2		4		0	0	0	0	0			2	2	0	1	1	0	0	2		2
0	81	6	2	151	35	15.3502	2007-08	5	99		4	6	0	1	1	0	0	0	0	1	2.44	2	2	1	0	0	0	0	1	1.11	4		0	0	0	0	0			4		0	0	0	0	0			4
0	76	6	2	160	60	23.4375	2007-07	22	99		4	6	0	1	1	0	0	0	0	1	1.04	2	2	1	0	0	0	0	1	5.17	2	2	1	0	0	0	0	1	1.39	2	2	1	0	0	0	0	1	2.62	2
1	77	6	2	170	54	18.6851	2007-07	6	99		4	5	0	1	1	0	0	0	0	1	2.88	2	2	1	0	0	0	0	1	1.74	2	2	1	0	0	0	0	1	4.33	2	2	1	0	0	0	0	1	5.7	2
1	66	4	2	174	64	21.1389	2007-07	99	99		2	3	0	1	1	0	0	0	0	1	2.92	4		0	0	0	0	0			4		0	0	0	0	0			2	2	1	0	0	0	0	1	1.77	2
0	88	6	2	146	38	17.827	2007-06	6	3	-3	4	6	0	1	1	0	0	0	0	1	2.88	2	2	1	0	0	0	0	1	1.43	2	2	1	0	0	0	0	1	2.94	2	2	1	0	0	0	0	1	2.6	2
0	77	6	2	158	54	21.6311	2007-05	4	99		3	5	0	1	1	0	0	0	0	1	2.05	2	2	1	0	0	0	0	1	3.67	2	2	1	0	0	0	0	1	2.99	2	2	1	0	0	0	0	1	4.16	2
0	76	6	2	155	52	21.6441	2007-04	99	99		4	7	0	1	1	0	0	0	0	1	2	2	2	1	0	0	0	0	1	1.76	2	2	1	0	0	0	0	1	3.1	2	2	1	0	0	0	0	1	2.89	2
1	74	5	2	99999	56		2007-02	22	21	-1	4	5	0	1	0	1	1	0	0	1	1.11	2	2	0	1	1	0	0	2		4		0	0	0	0	0			2	2	0	1	1	0	0	2		2
1	61	3	1	158	62	24.8358	2007-03	6	5	-1	4	4	0	1	1	0	0	0	0	1	2.45	2	2	1	0	0	0	0	1	2.13	2	2	1	0	0	0	0	1	1.57	2	2	1	0	0	0	0	1	3.38	2
1	76	6	2	157	54	21.9076	2007-03	99	99		4	5	0	1	1	0	0	0	0	1	2.45	2	2	1	0	0	0	0	1	1.5	2	2	1	0	0	0	0	1	2.4	2	2	1	0	0	0	0	1	3.01	2
0	84	6	2	150	55	24.4444	2008-11	99	0		5	7	0	1	1	0	0	0	0	1	1.1	2	2	1	0	0	0	0	1	2.19	4		0	0	0	0	0			2	2	1	0	0	0	0	1	1.4	2
1	65	4	2	162	62	23.6244	2007-02	3	3	0	3	4	0	1	1	0	0	0	0	1	1.8	2	2	1	0	0	0	0	1	2.65	2	2	1	0	0	0	0	1	3.4	2	2	1	0	0	0	0	1	1.95	2
0	65	4	2	148	66	30.1315	2007-02	14	0	-14	3	5	0	1	1	0	0	0	0	1	1.76	2	3	1	1	0	0	0	1	3.13	2	3	1	0	0	0	0	1	2.33	2	2	1	0	0	0	0	1	2.34	2
1	75	6	2	167	61	21.8724	2007-02	4	1	-3	4	5	0	1	1	0	0	0	0	1	1.73	2	2	1	0	0	0	0	1	1.52	2	2	1	0	0	0	0	1	1.48	2	2	1	0	0	0	0	1	1.63	2
0	71	5	2	146	55	25.8022	2007-02	99	99		3	5	0	1	0	1	0	0	1	1	1.03	2	2	0	1	0	0	0	2		4		0	0	0	0	0			2	2	0	1	0	0	1	2		3
0	79	6	2	158	50	20.0288	2007-01	99	99		4	6	0	1	0	1	1	1	0	1	1.09	2	3	0	1	0	1	0	2		2	2	0	1	0	1	0	2		2	2	0	1	0	1	0	2		2
0	68	4	2	153	44	18.7962	2007-01	99	99		3	5	0	1	1	0	0	0	0	1	1.86	2	2	1	0	0	0	0	2		4		0	0	0	0	0			2	2	1	0	0	0	0	1	1.9	2
1	69	4	2	160	59	23.0469	2007-01	99	99		4	5	0	1	1	0	0	0	0	1	2.16	2	2	1	0	0	0	0	1	2.04	2	2	1	0	0	0	0	1	2.32	2	2	1	0	0	0	0	1	2.76	2
0	73	5	2	150	69	30.6667	2007-01	99	99		3	5	0	1	1	0	0	0	0	1	2.53	4		0	0	0	0	0			4		0	0	0	0	0			4		0	0	0	0	0			4
1	67	4	2	168	74	26.2188	2007-01	99	99		4	5	0	1	1	1	0	0	1	1	1.56	2	2	1	1	0	0	0	1	2.33	2	2	1	1	0	0	1	1	1.34	2	2	1	1	0	0	1	1	1.29	2
1	63	3	1	99999	74		2006-12	14	99		3	3	0	1	1	1	0	0	1	1	2.04	2	2	1	1	0	0	0	1	1.99	4		0	0	0	0	0			2	2	1	1	0	0	1	1	2.01	2
1	76	6	2	162	68	25.9107	2008-10	4	99		4	5	0	1	0	1	1	0	0	1	1.21	2	3	1	0	0	0	0	1	3.07	2	2	1	0	0	0	0	1	3.39	2	2	1	0	0	0	0	1	1.32	2
1	63	3	1	156	60	24.6548	2006-12	5	99		2	2	0	1	1	0	0	0	0	1	2.73	2	2	1	0	0	0	0	1	1.85	2	2	1	0	0	0	0	2		2	2	1	0	0	0	0	1	2.21	2
0	73	5	2	152	55	23.8054	2006-10	99	99		3	5	0	1	1	0	0	0	0	1	1.5	2	2	1	0	0	0	0	1	1.43	2	2	1	0	0	0	0	1	1.67	2	2	1	0	0	0	0	1	1.45	2
0	89	6	2	152	47	20.3428	2006-10	4	0	-4	4	6	0	1	0	1	1	0	0	1	1.03	2	3	1	0	0	0	0	1	2.42	2	2	1	0	0	0	0	1	2.41	2	2	1	0	0	0	0	1	2.75	2
1	43	1	1	178	71	22.4088	2006-10	99	99		2	2	0	1	1	0	0	0	0	1	1.62	2	3	0	1	1	0	0	1	1.98	4		0	0	0	0	0			2	4	0	0	0	0	0	2		2
0	81	6	2	99999	47		2006-07	19	2	-17	4	6	0	1	1	0	0	0	0	1	2.51	2	2	1	0	0	0	0	1	1.55	2	2	1	0	0	0	0	2		2	2	1	0	0	0	0	1	2.07	2
0	72	5	2	150	50	22.2222	2006-06	11	10	-1	4	6	0	1	0	1	1	0	0	2		4		0	0	0	0	0			2	2	0	1	1	0	0	2		4		0	0	0	0	0			2
1	68	4	2	99999	69		2006-04	21	5	-16	4	5	0	1	0	1	1	0	0	2		2	2	0	1	1	0	0	2		2	2	0	1	1	0	0	2		2	2	0	1	1	0	0	2		2
1	70	5	2	157	51	20.6905	2006-04	99	99		2	3	0	1	1	0	0	0	0	1	1.89	2	3	1	1	1	0	0	2		2	3	0	1	1	0	0	1	1.1	2	2	0	1	1	0	0	2		2
0	73	5	2	99999	54		2006-02	99	99		3	5	0	1	1	0	0	0	0	1	2.6	2	2	1	0	0	0	0	1	1.47	4		0	0	0	0	0			2	2	1	0	0	0	0	1	1.28	2
0	77	6	2	148	61	27.8488	2006-02	99	99		5	7	0	1	1	0	0	0	0	1	1.53	2	2	1	0	0	0	0	1	1.74	2	2	1	0	0	0	0	1	1.39	2	2	1	0	0	0	0	1	1.52	2
0	64	3	1	157	54	21.9076	2008-08	99	99		3	4	0	1	1	0	0	0	0	1	1.97	2	4	0	0	0	0	0	2		4		0	0	0	0	0			4		0	0	0	0	0			4
1	63	3	1	165	65	23.8751	2006-02	99	99		2	2	0	1	1	0	0	0	0	1	1.6	2	3	1	1	0	0	0	1	1.53	2	2	1	1	0	0	1	1	1.72	2	2	1	1	0	0	1	1	1.86	2
1	63	3	1	173	80	26.7299	2005-11	1	1	0	2	2	0	1	1	0	0	0	0	1	1.53	2	2	1	0	0	0	0	1	2.52	2	2	1	0	0	0	0	1	3.08	2	2	1	0	0	0	0	1	1.23	2
1	65	4	2	171	64	21.8871	2005-10	99	99		4	5	0	1	1	0	0	0	0	1	2.37	2	3	1	1	0	0	0	1	2.18	2	2	1	1	0	0	1	1	5.99	2	3	0	1	1	0	0	1	1.13	2
1	57	2	1	165	79	29.0174	2005-08	99	99		4	4	0	1	1	0	0	0	0	1	1.9	2	3	1	1	0	0	0	1	2.21	4		0	0	0	0	0			2	2	1	1	0	0	1	2		2
1	66	4	2	99999	99999		2005-08	99	99		4	5	0	1	1	1	1	0	0	1	1.44	2	2	1	1	1	0	0	2		4		0	0	0	0	0			4		0	0	0	0	0			4
1	76	6	2	170	60	20.7612	2005-05	99	99		3	4	0	1	0	1	0	0	1	2		2	2	0	1	0	0	0	2		4		0	0	0	0	0			4		0	0	0	0	0			4
0	62	3	1	160	65	25.3906	2005-07	99	99		4	5	0	1	1	0	0	0	0	1	2.73	2	2	1	0	0	0	0	1	2.79	2	2	1	0	0	0	0	1	4.22	2	2	1	0	0	0	0	1	5.57	2
1	67	4	2	177	77	24.5779	2005-06	99	99		2	3	0	1	1	0	0	0	0	1	1.78	2	3	1	1	0	0	0	1	2.32	2	2	1	1	0	0	1	1	2.79	2	2	1	1	0	0	1	1	2.86	2
1	75	6	2	170	69	23.8754	2005-04	99	99		3	4	0	1	1	0	0	0	0	1	1.89	2	3	1	1	0	0	0	1	1	2	2	1	1	0	0	1	1	1.47	2	2	1	1	0	0	1	1	1.85	2
0	80	6	2	151	41	17.9817	2005-01	99	99		4	6	0	1	0	1	0	1	0	1	1.03	2	2	0	1	0	1	0	1	1.06	2	3	0	1	1	0	0	2		4		0	0	0	0	0			4
0	79	6	2	165	65	23.8751	2008-10	0	0	0	4	6	0	1	1	0	0	0	0	1	3.11	2	2	1	0	0	0	0	1	1.2	2	2	1	0	0	0	0	1	1.75	4		0	0	0	0	0			2
0	93	6	2	142	43	21.3251	2005-03	99	99		3	5	0	1	0	1	1	1	0	1	1	2	4	0	0	0	0	0	2				0	0	0	0	0					0	0	0	0	0
0	83	6	2	140	43	21.9388	2005-02	99	99		4	6	0	1	0	1	0	1	0	1	1.07	2	2	0	1	0	1	0	2		2	2	0	1	0	1	0	2		4		0	0	0	0	0			2
0	85	6	2	152	52	22.5069	2004-12	99	99		4	6	0	1	0	1	1	0	0	1	1.02	4		0	0	0	0	0			4		0	0	0	0	0			4		0	0	0	0	0			4
1	66	4	2	168	69	24.4473	2004-12	99	99		2	3	0	1	1	0	0	0	0	1	2.69	2	2	1	0	0	0	0	1	1.32	2	3	1	1	0	0	1	2		2	2	1	1	0	0	1	1	2.24	2
0	59	2	1	158	68	27.2392	2004-09	99	99		4	5	0	1	1	0	0	0	0	1	2.46	2	4	0	0	0	0	0	2		2	4	0	0	0	0	0	2		2	4	0	0	0	0	0	2		2
1	70	5	2	163	61	22.9591	2004-09	99	99		4	5	0	1	0	1	1	0	1	2		2	2	0	1	1	0	0	2		2	2	0	1	1	0	1	2		2	2	0	1	1	0	1	2		2
0	79	6	2	154	50	21.0828	2004-07	99	99		4	6	0	1	1	0	0	0	0	1	1.76	2	2	1	0	0	0	0	2		2	2	1	0	0	0	0	1	2.78	2	2	1	0	0	0	0	1	2.96	2
1	79	6	2	162	60	22.8624	2004-05	99	99		6	7	0	1	1	0	0	0	0	1	4.72	4		0	0	0	0	0			4		0	0	0	0	0			2	3	0	1	1	0	0	2		4
0	64	3	1	157	53	21.5019	2004-05	99	99		3	5	0	1	0	1	1	0	0	2		2	4	0	0	0	0	0	1	4.18			0	0	0	0	0					0	0	0	0	0
1	83	6	2	160	45	17.5781	2004-05	99	99		4	5	0	2	0	0	0	0	0	2		2	3	0	1	0	0	0	2		2	2	0	1	0	0	1	2		4		0	0	0	0	0			4
0	83	6	2	99999	51		2008-10	22	19	-3	4	6	0	1	0	1	1	0	0	1	1	2	2	0	1	1	0	0	2		2	2	0	1	1	0	0	2		2	2	0	1	1	0	0	2		2
1	83	6	2	164	51	18.9619	2004-05	16	99		3	4	0	1	1	0	0	0	0	1	2.38	2	3	0	1	1	0	0	1	1.37	2	2	0	1	1	0	0	2		2	2	0	1	1	0	0	2		2
0	79	6	2	99999	99999		2004-05	99	99		4	6	0	1	0	1	1	0	0	2		2	3	0	1	0	0	0	2		4		0	0	0	0	0			4		0	0	0	0	0			4
0	68	4	2	157	75	30.4272	2004-05	99	99		3	5	0	1	1	0	0	0	0	1	1.18	2	2	1	0	0	0	0	1	3.31	2	2	1	0	0	0	0	1	2.48	2	2	1	0	0	0	0	1	2.04	2
1	58	2	1	162	63	24.0055	2004-05	99	99		4	4	0	1	1	1	1	0	0	1	3.17	2	3	1	0	0	0	0	1	3.87	2	2	1	0	0	0	0	1	1.36	2	2	1	0	0	0	0	1	1.99	2
0	73	5	2	155	52	21.6441	2004-02	99	99		4	6	0	1	1	0	0	0	0	1	2.02	2	2	1	0	0	0	0	1	2.41	4		0	0	0	0	0			2	2	1	0	0	0	0	1	2.13	2
1	66	4	2	164	63	23.4236	2004-02	9	4	-5	3	4	0	1	1	0	0	0	0	1	2.37	2	4	0	0	0	0	0	2		2	4	0	0	0	0	0	2		2	4	0	0	0	0	0	2		2
1	63	3	1	165	88	32.3232	2004-02	99	99		4	4	0	1	1	0	0	0	0	1	2.11	2	3	1	1	1	0	0	2		2	3	1	0	0	0	0	1	1.35	2	2	1	0	0	0	0	1	2.42	2
0	90	6	2	141	41	20.6227	2004-01	99	99		4	6	0	1	0	1	0	1	0	2		2	2	0	1	0	1	0	2		2	2	0	1	0	1	0	2		2	2	0	1	0	1	0	2		2
1	70	5	2	165	64	23.5078	2003-12	99	99		2	3	0	1	0	1	1	0	0	1	1	2	2	0	1	1	0	0	2		2	2	0	1	1	0	0	2		2	2	0	1	1	0	0	2		2
0	73	5	2	148	57	26.0226	2003-12	99	99		3	5	0	1	1	0	0	0	0	1	2.57	2	2	1	0	0	0	0	2		2	2	1	0	0	0	0	2		4		0	0	0	0	0			4
1	72	5	2	169	75.7	26.5047	2008-12	5	99		4	5	0	1	0	1	0	1	1	2		4		0	0	0	0	0			4		0	0	0	0	0			2	2	0	1	0	1	1	2		4
1	63	3	1	164	60.3	22.4197	2008-11	17	99		3	3	0	1	0	1	1	0	0	2		4		0	0	0	0	0			4		0	0	0	0	0			4		0	0	0	0	0			4
1	65	4	2	164	63.3	23.5351	2007-03	99	99		4	5	0	2	0	0	0	0	0	1	2.28	4		0	0	0	0	0			4		0	0	0	0	0			4		0	0	0	0	0			4
1	69	4	2	165.9	51.4	18.6754	2007-03	19	17	-2	5	6	0	1	1	0	0	0	0	1	2.72	4		0	0	0	0	0			4		0	0	0	0	0			4		0	0	0	0	0			4
0	67	4	2	149	50.3	22.6566	2007-03	99	99		2	4	0	1	1	1	1	0	0	1	1.98	4		0	0	0	0	0			2	3	1	0	0	0	0	2		4		0	0	0	0	0			4
1	72	5	2	165	46.25	16.9881	2007-02	99	99		4	5	0	1	1	0	0	0	0	1	1.43	2	2	1	0	0	0	0	1	2.2	2	2	1	0	0	0	0	1	1.86	4		0	0	0	0	0			4
1	82	6	2	170	67.4	23.3218	2007-03	99	99		4	5	0	1	1	0	0	0	0	1	2.16	2	2	1	0	0	0	0	2		2	2	1	0	0	0	0	1	1.29	2	2	1	0	0	0	0	1	1.29	4
1	77	6	2	165	67.4	24.7567	2007-02	99	99		4	5	0	1	1	0	0	0	0	1	2.93	4		0	0	0	0	0			4		0	0	0	0	0			4		0	0	0	0	0			4
1	57	2	1	165	61.6	22.6263	2007-02	99	99		2	2	0	1	1	0	0	0	0	1	1.68	2	2	1	0	0	0	0	2		2	2	1	0	0	0	0	1	1.62	2	2	1	0	0	0	0	1	1.62	2
0	76	6	2	153	44.8	19.1379	2006-12	99	99		4	6	0	1	1	1	1	0	0	1	2	4		0	0	0	0	0			2	2	1	1	1	0	0	1	2.17	2	2	1	1	1	0	0	1	2.17	4
0	67	4	2	160	61.3	23.9453	2006-12	99	99		4	6	0	1	1	0	0	0	0	1	1.91	2	2	1	0	0	0	0	2		2	2	1	0	0	0	0	2		4		0	0	0	0	0			4
0	82	6	2	150	52.2	23.2	2006-11	99	99		4	6	0	1	0	1	1	0	0	2		2	3	0	1	1	1	0	2		4		0	0	0	0	0			2	2	0	1	1	1	0	2		2
0	75	6	2	154	61.6	25.974	2008-10	20	16	-4	3	5	0	1	1	0	0	0	0	1	2.45	2	2	1	0	0	0	0	1	1.6	4		0	0	0	0	0			4		0	0	0	0	0			4
1	79	6	2	173	62.3	20.8159	2006-10	99	99		3	4	0	1	1	1	0	1	0	1	2.52	4		0	0	0	0	0			2	2	1	1	0	1	0	1	1.26	2	3	0	1	0	1	0	1	2.02	2
1	50	1	1	166.9	90.55	32.5069	2006-10	99	99		3	3	0	1	1	0	0	0	0	1	2.34	4		0	0	0	0	0			4		0	0	0	0	0			4		0	0	0	0	0			4
1	59	2	1	172	80.5	27.2107	2006-08	99	99		2	2	0	1	1	0	0	0	0	1	1.98	4		0	0	0	0	0			4		0	0	0	0	0			4		0	0	0	0	0			4
1	60	3	1	168	75.8	26.8566	2006-08	99	99		3	3	0	1	1	0	0	0	0	1	1.99	4		0	0	0	0	0			4		0	0	0	0	0			4		0	0	0	0	0			4
1	59	2	1	168	79.7	28.2384	2006-08	99	99		3	3	0	1	0	1	1	0	0	2		4		0	0	0	0	0			4		0	0	0	0	0			4		0	0	0	0	0			4
1	60	3	1	178	80.1	25.2809	2006-07	99	99		3	3	0	1	1	1	1	0	0	1	2.31	4		0	0	0	0	0			4		0	0	0	0	0			4		0	0	0	0	0			4
0	71	5	2	152	80	34.626	2006-06	99	99		3	5	0	1	1	0	0	0	0	1	2.23	4		0	0	0	0	0			4		0	0	0	0	0			4		0	0	0	0	0			4
1	53	1	1	171	71	24.281	2006-05	99	99		3	3	0	1	1	0	0	0	0	1	1.82	4		0	0	0	0	0			4		0	0	0	0	0			4		0	0	0	0	0			4
1	59	2	1	169	73.5	25.7344	2006-04	99	99		3	3	0	1	1	0	0	0	0	1	2.24	4		0	0	0	0	0			4		0	0	0	0	0			4		0	0	0	0	0			4
0	65	4	2	154	62.45	26.3324	2006-05	99	99		3	5	0	1	1	0	0	0	0	1	2.09	4		0	0	0	0	0			4		0	0	0	0	0			4		0	0	0	0	0			4
1	70	5	2	172.6	67.5	22.658	2008-10	1	99		4	5	0	1	1	1	1	1	0	1	1.79	2	2	1	1	1	1	0	2		2	2	1	1	1	1	0	1	2.09	4		0	0	0	0	0			4
1	72	5	2	170	70	24.2215	2006-05	99	99		3	4	0	1	1	0	0	0	0	1	2	4		0	0	0	0	0			4		0	0	0	0	0			4		0	0	0	0	0			4
1	62	3	1	170	59.45	20.5709	2006-02	99	99		3	3	0	1	1	0	0	0	0	1	2.94	4		0	0	0	0	0			4		0	0	0	0	0			4		0	0	0	0	0			4
1	65	4	2	164	75.45	28.0525	2006-04	99	99		4	5	0	1	1	0	0	0	0	1	2.22	4		0	0	0	0	0			4		0	0	0	0	0			4		0	0	0	0	0			4
0	72	5	2	158	58.65	23.4938	2006-03	99	99		2	4	0	1	1	0	0	0	0	1	2.27	4		0	0	0	0	0			4		0	0	0	0	0			4		0	0	0	0	0			4
1	48	1	1	168.5	64.1	22.5766	2006-03	99	99		3	3	0	1	1	1	1	1	0	1	2.1	4		0	0	0	0	0			4		0	0	0	0	0			4		0	0	0	0	0			4
1	53	1	1	176	72	23.2438	2006-03	99	99		4	4	0	1	1	0	0	0	0	1	1.84	4		0	0	0	0	0			4		0	0	0	0	0			4		0	0	0	0	0			4
1	68	4	2	170	62.45	21.609	2006-02	99	99		3	4	0	1	1	0	0	0	0	1	2.39	4		0	0	0	0	0			4		0	0	0	0	0			4		0	0	0	0	0			4
0	77	6	2	99999	58.6		2006-01	99	99		5	7	0	1	1	1	1	0	0	1	1.56	4		0	0	0	0	0			4		0	0	0	0	0			4		0	0	0	0	0			4
1	63	3	1	176	93.4	30.1524	2005-12	99	99		4	4	0	1	1	0	0	0	0	1	2.33	4		0	0	0	0	0			4		0	0	0	0	0			4		0	0	0	0	0			4
0	68	4	2	146	67	31.4318	2005-10	99	99		3	5	0	1	1	0	0	0	0	1	2.11	4		0	0	0	0	0			4		0	0	0	0	0			4		0	0	0	0	0			4
1	71	5	2	165	61.6	22.6263	2008-10	0	99		3	4	0	1	1	1	1	0	0	2		2	2	1	1	1	0	0	1	3.84	2	2	1	1	1	0	0	1	2.29	4		0	0	0	0	0			2
1	65	4	2	159.3	63	24.8261		99	99		5	6		1	1	0	0	0	0	1	1.58	4		0	0	0	0	0			4		0	0	0	0	0			4		0	0	0	0	0			4
0	73	5	2	153	50.55	21.5943	2005-10	99	99		4	6	0	1	1	0	0	0	0	1	2.11	4		0	0	0	0	0			4		0	0	0	0	0			4		0	0	0	0	0			4
0	78	6	2	155	64	26.6389	2005-09	99	99		4	6	0	1	1	0	0	0	0	1	1.21	4		0	0	0	0	0			4		0	0	0	0	0			4		0	0	0	0	0			4
0	58	2	1	162	48.75	18.5757	2005-09	99	99		3	4	0	1	1	0	0	0	0	2		4		0	0	0	0	0			4		0	0	0	0	0			4		0	0	0	0	0			4
1	66	4	2	178	58.3	18.4005	2005-07	99	99		3	4	0	1	1	1	1	0	0	1	2.41	4		0	0	0	0	0			4		0	0	0	0	0			4		0	0	0	0	0			4
1	65	4	2	178.7	83.15	26.0383	2005-06	99	99		3	4	0	1	1	0	0	0	0	1	2.14	4		0	0	0	0	0			4		0	0	0	0	0			4		0	0	0	0	0			4
0	45	1	1	162	43.45	16.5562	2005-06	99	99		2	3	0	1	1	0	0	0	0	1	1.23	4		0	0	0	0	0			4		0	0	0	0	0			4		0	0	0	0	0			4
1	64	3	1	162	61.8	23.5482		17	99		3	4		1	1	1	1	1	0	1	2.3	4		0	0	0	0	0			4		0	0	0	0	0			4		0	0	0	0	0			4
1	69	4	2	99999	56.3		2005-05	99	99		3	4	0	2	0	0	0	0	0	2		4		0	0	0	0	0			4		0	0	0	0	0			4		0	0	0	0	0			4
0	56	2	1	160	50.4	19.6875	2005-05	99	99		2	3	0	1	1	0	0	0	0	1	2.17	4		0	0	0	0	0			4		0	0	0	0	0			4		0	0	0	0	0			4
1	59	2	1	99999	83.9		2008-10	1	99		3	3	0	1	1	1	1	0	0	2		2	3	1	0	0	0	0	1	2.86	2	2	1	0	0	0	0	1	2.24	2	2	1	0	0	0	0	1	2.08	2
1	64	3	1	163	63.4	23.8624	2005-05	99	99		2	2	0	1	0	1	1	0	0	1	1.02	4		0	0	0	0	0			4		0	0	0	0	0			4		0	0	0	0	0			4
1	48	1	1	172	53.2	17.9827	2005-04	99	99		2	2	0	1	0	1	1	1	0	2		2	2	0	1	1	1	0	1	1.37	2	2	0	1	1	1	0	1	1.01	4		0	0	0	0	0			4
1	57	2	1	175	63	20.5714	2005-04	15	99		3	3	0	2	0	0	0	0	0	1	1.2	4		0	0	0	0	0			4		0	0	0	0	0			4		0	0	0	0	0			4
1	72	5	2	160	52	20.3125	2005-03	99	99		4	5	0	1	1	0	0	0	0	1	2.09	4		0	0	0	0	0			4		0	0	0	0	0			4		0	0	0	0	0			4
1	70	5	2	168	54.3	19.2389		99	99		4	5		1	1	0	0	0	0	1	2.95	2	2	1	0	0	0	0	1	2.04	4		0	0	0	0	0			4		0	0	0	0	0			4
1	65	4	2	99999	64.2		2005-02	99	99		3	4	0	1	1	0	0	0	0	1	2.08	4		0	0	0	0	0			4		0	0	0	0	0			4		0	0	0	0	0			4
1	59	2	1	99999	49.2		2005-02	99	99		3	3	0	2	0	0	0	0	0	2		4		0	0	0	0	0			4		0	0	0	0	0			4		0	0	0	0	0			4
1	48	1	1	176	71.95	23.2277	2005-02	99	99		4	4	0	1	1	0	0	0	0	1	3.3	4		0	0	0	0	0			4		0	0	0	0	0			4		0	0	0	0	0			4
1	70	5	2	162	63.6	24.2341	2005-02	99	99		3	4	0	1	1	0	0	0	0	1	1.97	4		0	0	0	0	0			4		0	0	0	0	0			4		0	0	0	0	0			4
0	58	2	1	166	69.6	25.2577	2005-02	99	99		2	3	0	1	1	0	0	0	0	1	2.4	4		0	0	0	0	0			4		0	0	0	0	0			4		0	0	0	0	0			4
0	74	5	2	151	59.6	26.1392	2008-10	2	99		3	5	0	1	1	0	0	0	0	1	2	4		0	0	0	0	0			2	2	1	0	0	0	0	1	4.75	4		0	0	0	0	0			2
1	49	1	1	167.7	78.95	28.0728	2006-01	3	99		4	4	0	1	1	1	1	0	0	1	1.98	4		0	0	0	0	0			4		0	0	0	0	0			4		0	0	0	0	0			4
1	72	5	2	178	76.5	24.1447	2008-10	99	5		2	3	-1	1	1	0	0	0	0	1	2.12	2	2	1	0	0	0	0	2		2	2	1	0	0	0	0	1	1.65	2	2	1	0	0	0	0	1	1.87	2
1	79	6	2	165	69.4	25.4913	2008-09	6	4	-2	4	5	0	1	1	1	0	1	0	1	2.03	2	3	1	1	1	0	0	1	1.7	2	2	1	1	1	0	0	1	1.65	2	3	1	0	0	0	0	1	1.51	4
0	74	5	2	157	61.1	24.788	2008-09	1	99		3	5	0	1	1	1	1	0	0	1	1.9	4		0	0	0	0	0			4		0	0	0	0	0			4		0	0	0	0	0			4
1	61	3	1	165	64.5	23.6915	2008-09	10	99		3	3	0	1	1	0	0	0	0	1	1.75	2	2	1	0	0	0	0	1	2.38	2	2	1	0	0	0	0	1	3.12	4		0	0	0	0	0			2
1	73	5	2	165	51.6	18.9532	2008-12	4	99		2	3	0	1	1	0	0	0	0	1	3.08	2	2	1	0	0	0	0	1	2.14	2	2	1	0	0	0	0	1	2.39	2	2	1	0	0	0	0	1	1.99	2
1	71	5	2	170	82	28.3737	2008-09	0	99		2	3	0	1	1	1	1	0	0	1	1.67	2	2	1	1	1	0	0	2		2	2	1	1	1	0	0	1	1.83	2	2	1	1	1	0	0	1	1.78	2
1	60	3	1	171.8	74.4	25.2073	2008-08	99	99		3	4	0	1	0	1	0	1	0	2		4		0	0	0	0	0			4		0	0	0	0	0			2	3	1	1	1	0	0	1	2.93	2
1	62	3	1	99999	99999		2008-08	99	99		4	4	0	2	0	0	0	0	0	2		4		0	0	0	0	0					0	0	0	0	0					0	0	0	0	0
0	63	3	1	149	49.7	22.3864	2008-08	0	99		3	4	0	1	1	0	0	0	0	1	2.07	2	2	1	0	0	0	0	1	1.74	2	2	1	0	0	0	0	1	1.29	2	2	1	0	0	0	0	1	2.32	2
1	68	4	2	168	65.5	23.2072	2008-08	99	99		2	3	0	1	1	0	0	0	0	1	2.47	2	2	1	0	0	0	0	1	1.39	4		0	0	0	0	0			2	2	1	0	0	0	0	2		2
1	65	4	2	172	60.5	20.4502	2008-07	0	99		3	4	0	1	1	0	0	0	0	1	2.12	2	2	1	0	0	0	0	1	1.84	2	2	1	0	0	0	0	2		4		0	0	0	0	0			4
0	71	5	2	154	50.6	21.3358	2008-07	99	99		3	5	0	1	1	0	0	0	0	1	2.31	4		0	0	0	0	0			2	2	1	0	0	0	0	2		4		0	0	0	0	0			4
1	80	6	2	99999	71		2008-07	12	99		5	6	0	1	0	1	1	1	0	2		4		0	0	0	0	0			2	3	1	0	0	0	0	1	2	2	2	1	0	0	0	0	1	2.06	4
1	76	6	2	172.7	58	19.4466	2008-07	3	99		5	6	0	1	0	1	1	1	0	2		4		0	0	0	0	0			4		0	0	0	0	0			2	3	1	1	1	0	0	1	2.44	4
1	66	4	2	99999	58.4		2008-04	99	38		3	4	0	2	0	0	0	0	0	1	1.55	4		0	0	0	0	0			4		0	0	0	0	0			4		0	0	0	0	0			4
1	58	2	1	169.4	72.85	25.3865	2008-12	0	0	0	3	3	0	1	1	0	0	0	0	1	2.05	2	2	1	0	0	0	0	1	2.3	2	2	1	0	0	0	0	1	2.81	2	2	1	0	0	0	0	1	2.43	2
0	65	4	2	162	48	18.2899	2008-07	99	99		2	4	0	1	1	0	0	0	0	2		2	2	1	0	0	0	0	1	1.8	2	2	1	0	0	0	0	1	1.51	2	2	1	0	0	0	0	1	2.67	4
0	83	6	2	158	59.7	23.9144	2008-07	99	99		4	6	0	1	1	1	0	1	0	1	3.42	2	2	1	1	0	1	0	1	2.95	2	2	1	1	0	1	0	1	2.32	2	4	0	0	0	0	0	1	2.89	2
1	54	1	1	179	87.8	27.4024	2008-07	12	99		2	2	0	1	1	0	0	0	0	1	2	4		0	0	0	0	0			2	2	1	0	0	0	0	2		2	2	1	0	0	0	0	1	1.98	4
1	65	4	2	99999	69.7		2008-03	15	16	1	3	4	0	1	1	0	0	0	0	1	1.94	4		0	0	0	0	0			4		0	0	0	0	0			4		0	0	0	0	0			4
1	79	6	2	162.5	52.4	19.8438	2008-06	99	99		4	5	0	1	1	1	1	0	0	1	2.22	4		0	0	0	0	0			2	3	0	1	1	0	0	2		2	4	0	0	0	0	0	2		2
1	78	6	2	99999	67		2008-05	99	99		3	4	0	2	0	0	0	0	0	1	2.57	4		0	0	0	0	0			4		0	0	0	0	0			4		0	0	0	0	0			4
0	67	4	2	153	53.4	22.8117	2008-05	1	99		3	5	0	1	1	0	0	0	0	1	2.12	2	2	1	0	0	0	0	1	2.88	2	2	1	0	0	0	0	1	1.48	2	2	1	0	0	0	0	1	1.7	2
0	73	5	2	161	69	26.6193	2008-05	99	99		2	4	0	1	1	0	0	0	0	1	1.77	2	2	1	0	0	0	0	1	2.25	2	2	1	0	0	0	0	1	2.09	2	2	1	0	0	0	0	1	2.18	2
0	60	3	1	161	49.9	19.2508	2008-05	12	99		4	5	0	1	1	0	0	0	0	1	2.32	2	2	1	0	0	0	0	1	1.77	4		0	0	0	0	0			4		0	0	0	0	0			4
1	79	6	2	177	85.1	27.1633	2008-05	4	1	-3	4	5	0	1	1	1	1	0	0	1	2.95	2	2	1	1	1	0	0	1	2.23	2	2	1	1	1	0	0	1	2.02	2	2	1	1	1	0	0	1	2.25	2
1	39	1	1	169	68.3	23.9137	2008-12	0	99		3	3	0	2	0	0	0	0	0	2		4		0	0	0	0	0			4		0	0	0	0	0			4		0	0	0	0	0			4
1	65	4	2	167.5	63.7	22.7044	2008-04	99	99		5	6	0	1	1	1	1	1	0	1	1.86	2	2	1	1	1	1	0	1	2.44	2	3	1	1	1	0	0	2		2	2	1	1	1	0	0	1	2.47	2
1	66	4	2	99999	58.4		2008-04	99	99		3	4	0	1	1	0	0	0	0	1	1.55	2	2	1	0	0	0	0	1	1.71	4		0	0	0	0	0			4		0	0	0	0	0			4
1	58	2	1	170	78.5	27.1626	2008-04	99	99		3	3	0	1	1	1	1	0	1	1	2.5	4		0	0	0	0	0			4		0	0	0	0	0			4		0	0	0	0	0			4
1	89	6	2	162	61	23.2434	2008-04	17	99		4	5	0	1	1	0	0	0	0	1	2.29	2	2	1	0	0	0	0	2		4		0	0	0	0	0			4		0	0	0	0	0			4
1	79	6	2	171	76.3	26.0935	2008-03	3	99		4	5	0	1	1	0	0	0	0	1	2.24	2	2	1	0	0	0	0	1	2.57	2	2	1	0	0	0	0	1	2.4	2	2	1	0	0	0	0	1	2.29	2
0	64	3	1	156	55.8	22.929	2008-03	99	99		4	5	0	1	1	1	1	0	0	1	1.64	2	3	0	1	1	0	0	1	1.11	4		0	0	0	0	0			4		0	0	0	0	0			4
0	83	6	2	143	52.5	25.6736	2008-03	17	99		5	7	0	1	1	0	0	0	0	1	2.38	4		0	0	0	0	0			4		0	0	0	0	0			4		0	0	0	0	0			4
1	64	3	1	167	70	25.0995	2008-03	99	99		2	2	0	1	1	0	0	0	0	1	2.02	2	2	1	0	0	0	0	1	2.65	2	2	1	0	0	0	0	1	2.32	2	2	1	0	0	0	0	1	2.28	2
0	76	6	2	158	52.6	21.0703	2008-03	99	99		3	5	0	1	1	0	0	0	0	1	2.02	2	2	1	0	0	0	0	2		4		0	0	0	0	0			4		0	0	0	0	0			4
0	73	5	2	155	63	26.2227	2008-03	99	99		3	5	0	2	0	0	0	0	0	2		4		0	0	0	0	0					0	0	0	0	0					0	0	0	0	0
0	88	6	2	160	55.4	21.6406	2008-12	7	99		4	6	0	1	1	0	0	0	0	1	2.57	4		0	0	0	0	0			2	2	1	0	0	0	0	1	2.09	4		0	0	0	0	0			2
0	77	6	2	153	48	20.5049	2008-02	99	99		4	6	0	1	1	0	0	0	0	1	2.55	2	2	1	0	0	0	0	1	1.58	2	2	1	0	0	0	0	2		4		0	0	0	0	0			4
1	64	3	1	168	62.9	22.286	2008-02	99	99		3	3	0	1	1	0	0	0	0	1	2.12	2	2	1	0	0	0	0	1	1.94	2	2	1	0	0	0	0	1	2.39	2	2	1	0	0	0	0	1	2.34	2
0	85	6	2	158	57.9	23.1934	2008-02	99	99		4	6	0	1	1	0	0	0	0	1	1.63	4		0	0	0	0	0			2	2	1	0	0	0	0	1	2.02	2	2	1	0	0	0	0	1	2.67	2
0	92	6	2	155	39.7	16.5245	2008-02	22	99		4	6	0	2	0	0	0	0	0	2		4		0	0	0	0	0					0	0	0	0	0					0	0	0	0	0
1	52	1	1	164	73.1	27.1788	2008-01	20	0	-20	2	2	0	1	1	0	0	0	0	1	2.16	2	2	1	0	0	0	0	2		4		0	0	0	0	0			2	2	1	0	0	0	0	1	1.7	2
1	75	6	2	164	63	23.4236	2008-01	99	99		3	4	0	1	1	0	0	0	0	1	4.3	4		0	0	0	0	0			4		0	0	0	0	0			4		0	0	0	0	0			4
0	74	5	2	99999	99999		2008-01	24	99		4	6	0	2	0	0	0	0	0	2		4		0	0	0	0	0					0	0	0	0	0					0	0	0	0	0
0	61	3	1	162	99999		2008-01	15	21	6	4	5	0	2	0	0	0	0	0	2		4		0	0	0	0	0					0	0	0	0	0					0	0	0	0	0
0	55	2	1	155	47.6	19.8127		99	99		5	6		1	1	0	0	0	0	1	2.09	2	2	1	0	0	0	0	1	2.82	4		0	0	0	0	0			4		0	0	0	0	0			4
1	59	2	1	99999	68.3		2007-12	99	99		3	3	0	1	1	0	0	0	0	1	2.07	4		0	0	0	0	0			2	2	1	0	0	0	0	1	2.08	4		0	0	0	0	0			2
0	80	6	2	157	45.1	18.2969	2008-12	25	99		3	5	0	2	0	0	0	0	0	2		4		0	0	0	0	0					0	0	0	0	0					0	0	0	0	0
1	70	5	2	99999	72.4		2007-12	99	99		3	4	0	1	1	0	0	0	0	1	2.42	2	2	1	0	0	0	0	1	2.89	2	2	1	0	0	0	0	1	2.31	2	2	1	0	0	0	0	1	1.35	2
1	70	5	2	170	58.1	20.1038	2007-12	99	99		4	5	0	1	1	0	0	0	0	1	2.13	2	2	1	0	0	0	0	1	1.84	2	2	1	0	0	0	0	2		4		0	0	0	0	0			4
1	80	6	2	172	67.8	22.9178	2007-12	2	99		3	4	0	1	0	1	1	1	0	1	2.07	2	2	0	1	1	1	0	2		4		0	0	0	0	0			4		0	0	0	0	0			2
1	46	1	1	173	79.6	26.5963	2007-11	99	99		2	2	0	1	1	0	0	0	0	1	3.82	2	2	1	0	0	0	0	1	2.11	4		0	0	0	0	0			4		0	0	0	0	0			4
0	78	6	2	150	52	23.1111	2007-11	99	99		4	6	0	1	1	0	0	0	0	1	2.58	2	2	1	0	0	0	0	1	1.79	2	3	0	1	1	1	0	2		4		0	0	0	0	0			2
0	72	5	2	155	67.1	27.9292	2007-11	99	1		4	6	0	1	1	0	0	0	0	1	1.9	2	2	1	0	0	0	0	1	1.89	2	3	0	1	1	1	0	2		4		0	0	0	0	0			4
0	82	6	2	155	57	23.7253	2007-11	99	99		4	6	0	1	1	0	0	0	0	1	2.15	4		0	0	0	0	0			4		0	0	0	0	0			2	3	1	1	1	0	0	2		2
1	46	1	1	174	77.6	25.6309	2007-10	99	99		2	2	0	1	1	0	0	0	0	1	1.8	2	2	1	0	0	0	0	1	2.75	2	2	1	0	0	0	0	1	3.02	2	2	1	0	0	0	0	1	1.42	2
0	38	1	1	156	62.3	25.5999	2007-10	99	15		3	4	0	1	1	0	0	0	0	1	2.99	2	2	1	0	0	0	0	2		2	2	1	0	0	0	0	1	2.35	4		0	0	0	0	0			4
0	66	4	2	151	51.7	22.6744	2007-10	5	99		3	5	0	1	1	0	0	0	0	1	2.69	2	2	1	0	0	0	0	1	1.85	2	2	1	0	0	0	0	2		2	2	1	0	0	0	0	1	2.28	4
1	75	6	2	150	63.7	28.3111	2008-12	2	99		5	6	0	1	1	0	0	0	0	1	1.98	2	2	1	0	0	0	0	1	1.78	2	2	1	0	0	0	0	1	1.71	2	2	1	0	0	0	0	1	1.7	2
0	65	4	2	158	86.45	34.6299	2007-10	99	99		3	5	0	1	1	0	0	0	0	1	2.15	2	2	1	0	0	0	0	1	1.86	4		0	0	0	0	0			2	2	1	0	0	0	0	2		2
0	77	6	2	99999	99999		2007-09	99	99		4	6	0	2	0	0	0	0	0	2		4		0	0	0	0	0					0	0	0	0	0					0	0	0	0	0
0	67	4	2	154	60.6	25.5524	2007-09	99	99		3	5	0	1	1	0	0	0	0	1	1.73	2	2	1	0	0	0	0	1	2.31	2	2	1	0	0	0	0	1	2.04	2	2	1	0	0	0	0	1	2.28	2
0	50	1	1	154	54.75	23.0857	2007-09	4	5	1	3	4	0	2	0	0	0	0	0	1	1	2	3	0	1	0	1	0	2		4		0	0	0	0	0			2	2	0	1	0	1	0	2		2
1	74	5	2	163	71.1	26.7605	2007-08	99	99		4	5	0	1	1	0	0	0	0	1	1.98	4		0	0	0	0	0			4		0	0	0	0	0			4		0	0	0	0	0			4
0	71	5	2	156	69.2	28.4352	2007-08	99	99		4	6	0	1	1	0	0	0	0	1	2.06	4		0	0	0	0	0			4		0	0	0	0	0			2	3	0	1	1	1	0	2		2
1	72	5	2	165	64.75	23.7833	2007-08	99	99		2	3	0	1	1	0	0	0	0	1	2.13	2	2	1	0	0	0	0	1	2.54	2	2	1	0	0	0	0	2		2	2	1	0	0	0	0	1	2.17	2
1	75	6	2	174	62.5	20.6434	2007-08	99	99		4	5	0	1	1	0	0	0	0	1	1.94	2	2	1	0	0	0	0	1	2.47	2	2	1	0	0	0	0	1	1.8	2	2	1	0	0	0	0	1	2.2	2
0	68	4	2	160	60.5	23.6328	2007-08	1	99		2	4	0	1	1	0	0	0	0	1	2.57	2	2	1	0	0	0	0	1	1.89	4		0	0	0	0	0			4		0	0	0	0	0			4
0	74	5	2	145.6	49.8	23.4913		99	99		3	5		1	1	0	0	0	0	1	2.05	2	2	1	0	0	0	0	1	1.57	2	2	1	0	0	0	0	1	1.56	2	2	1	0	0	0	0	1	2.64	2
0	57	2	1	160	58.5	22.8516	2008-10	1	1	0	3	4	0	1	1	0	0	0	0	1	1.65	2	2	1	0	0	0	0	1	1.5	2	2	1	0	0	0	0	1	2.95	2	2	1	0	0	0	0	1	2.33	2
0	75	6	2	164	54.3	20.1889	2007-08	99	99		4	6	0	1	1	0	0	0	0	1	3.14	2	2	1	0	0	0	0	1	2.17	4		0	0	0	0	0			2	2	1	0	0	0	0	1	1.31	2
0	90	6	2	99999	51.8			25	99		4	6		2	0	0	0	0	0	2		4		0	0	0	0	0			4		0	0	0	0	0			4		0	0	0	0	0			4
1	55	2	1	162	58.2	22.1765	2007-07	99	99		4	4	0	1	1	1	1	0	0	1	1.96	2	2	1	1	1	0	0	2		2	2	1	1	1	0	0	2		2	2	1	1	1	0	0	2		2
0	74	5	2	153	56.8	24.2642	2007-07	99	99		3	5	0	1	1	0	0	0	0	1	1.98	2	2	1	0	0	0	0	2		2	2	1	0	0	0	0	1	1.98	2	2	1	0	0	0	0	1	1.81	2
1	79	6	2	170	55.6	19.2388	2007-07	99	99		5	6	0	2	0	0	0	0	0	1	1.3	4		0	0	0	0	0			4		0	0	0	0	0			2	3	0	1	1	1	0	2		4
0	92	6	2	99999	59.2			34	99		4	6		1	0	1	1	0	0	1	1.06	4		0	0	0	0	0			4		0	0	0	0	0			4		0	0	0	0	0			4
1	74	5	2	169	52.4	18.3467	2007-07	21	99		2	3	0	1	1	0	0	0	0	1	1.69	4		0	0	0	0	0			4		0	0	0	0	0			4		0	0	0	0	0			4
1	71	5	2	172	62.5	21.1263	2007-07	99	99		2	3	0	1	1	0	0	0	0	1	3.29	2	2	1	0	0	0	0	2		2	2	1	0	0	0	0	1	1.56	4		0	0	0	0	0			4
1	75	6	2	179	75.6	23.5948	2007-07	99	99		3	4	0	1	1	0	0	0	0	1	2.79	4		0	0	0	0	0			4		0	0	0	0	0			4		0	0	0	0	0			4
1	63	3	1	170	74.5	25.7785	2007-06	0	99		3	3	0	1	1	0	0	0	0	1	2.23	2	2	1	0	0	0	0	2		2	2	1	0	0	0	0	1	2.13	2	2	1	0	0	0	0	1	2.7	2
0	85	6	2	148	41.2	18.8093	2008-10	5	99		5	7	0	1	1	1	1	0	0	1	2.03	2	3	1	0	0	0	0	1	1.55	2	2	1	0	0	0	0	1	1.99	2	2	1	0	0	0	0	1	1.61	2
0	70	5	2	153	60.4	25.802	2007-06	99	99		4	6	0	1	1	1	1	0	1	1	1.96	2	3	1	0	0	0	0	2		2	2	1	0	0	0	0	1	2.11	2	2	1	0	0	0	0	1	1.7	2
1	69	4	2	170	68.1	23.564	2007-05	99	99		3	4	1	1	1	0	0	0	0	1	2.73	4		0	0	0	0	0			4		0	0	0	0	0			4		0	0	0	0	0			4
1	78	6	2	176	71.25	23.0017	2007-06	7	6	-1	5	6	0	1	1	0	0	0	0	1	2.19	4		0	0	0	0	0			4		0	0	0	0	0			4		0	0	0	0	0			2
1	75	6	2	173	59.95	20.0307	2007-06	99	6		4	5	0	1	1	0	0	0	0	1	1.83	4		0	0	0	0	0			4		0	0	0	0	0			2	2	1	0	0	0	0	2		2
0	84	6	2	153	49.8	21.2739	2007-05	99	99		4	6	0	1	1	0	0	0	0	1	2.13	2	2	1	0	0	0	0	1	1.59	4		0	0	0	0	0			4		0	0	0	0	0			4
1	54	1	1	167.7	62.55	22.2414	2007-05	99	4		3	3	0	1	1	0	0	0	0	1	2.53	2	2	1	0	0	0	0	1	1.69	2	2	1	0	0	0	0	1	2.94	4		0	0	0	0	0			4
1	69	4	2	174	73.15	24.1611		99	99		3	4		1	1	0	0	0	0	1	1.56	2	2	1	0	0	0	0	2		2	2	1	0	0	0	0	1	2.1	4		0	0	0	0	0			4
1	69	4	2	155	48.85	20.333	2007-04	99	99		2	3	0	1	1	0	0	0	0	1	2.73	4		0	0	0	0	0			2	2	1	0	0	0	0	1	1.5	4		0	0	0	0	0			2
1	56	2	1	163	62.4	23.486	2007-04	99	99		3	3	0	1	1	0	0	0	0	1	2.26	2	2	1	0	0	0	0	2		4		0	0	0	0	0			2	2	1	0	0	0	0	2		2
1	66	4	2	168	67	23.7387	2007-03	4	99		3	4	0	1	1	0	0	0	0	1	2.41	4		0	0	0	0	0			2	2	1	0	0	0	0	1	2.15	4		0	0	0	0	0			2
1	54	1	1	191.7	99.7	27.1301	2008-12	5	0	-5	2	2	0	1	0	1	1	1	0	1	1	2	3	1	1	1	1	0	1	1.08	2	3	1	0	0	0	0	1	2.48	2	2	1	0	0	0	0	1	1.5	2
0	76	6	2	159.7	59.9	23.4864	2008-11	14	6	-8	5	7	0	1	1	1	1	0	0	1	2.61	2	4	0	0	0	0	0	2		4		0	0	0	0	0					0	0	0	0	0
0	81	6	2	155	55.4	23.0593	2007-10	23	23	0	3	5	0	1	0	1	1	0	0	1	1.01	4		0	0	0	0	0			4		0	0	0	0	0			4		0	0	0	0	0			4
1	85	6	2	170	71.1	24.6021	2007-10	21	2	-19	3	4	0	1	1	0	0	0	0	1	1.62	2	2	1	0	0	0	0	1	2.47	2	2	1	0	0	0	0	1	2.25	2	2	1	0	0	0	0	1	2.06	2
1	76	6	2	171	69.3	23.6996	2007-09	3	0	-3	3	4	0	1	1	1	1	0	0	1	2.19	2	3	1	0	0	0	0	1	2.53	4		0	0	0	0	0			2	2	1	0	0	0	0	1	4.29	2
0	69	4	2	99999	64		2007-09	2	0	-2	2	4	0	1	1	0	0	0	0	1	2.04	2	2	1	0	0	0	0	1	1.67	2	2	1	0	0	0	0	1	1.35	2	2	1	0	0	0	0	1	1.93	2
1	70	5	2	175	78.6	25.6653	2007-09	25	14	-11	2	3	0	1	1	0	0	0	0	1	3.04	4		0	0	0	0	0			4		0	0	0	0	0			4		0	0	0	0	0			4
1	58	2	1	99999	52.2		2007-09	2	2	0	3	3	0	1	1	0	0	0	0	1	1.98	2	2	1	0	0	0	0	1	2.64	4		0	0	0	0	0			4		0	0	0	0	0			4
0	81	6	2	155	45.7	19.0219	2007-09	16	16	0	5	7	0	1	1	1	1	0	0	1	2.23	4		0	0	0	0	0			2	4	0	0	0	0	0	1	2.9	4		0	0	0	0	0			4
0	77	6	2	150.3	53.4	23.6387	2007-09	6	4	-2	4	6	0	1	1	0	0	0	0	1	2.61	4		0	0	0	0	0			4		0	0	0	0	0			4		0	0	0	0	0			4
1	55	2	1	172	55.9	18.8953	2007-08	11	7	-4	4	4	0	1	1	0	0	0	0	1	2.56	2	2	1	0	0	0	0	1	4.18	4		0	0	0	0	0			2	2	1	0	0	0	0	1	1.61	2
0	75	6	2	157	51	20.6905	2007-08	5	4	-1	4	6	0	1	1	0	0	0	0	1	2.1	4		0	0	0	0	0			4		0	0	0	0	0			4		0	0	0	0	0			4
1	63	3	1	163.2	64.4	24.1794	2008-11	1	1	0	3	3	0	1	1	1	0	1	0	1	3.38	2	3	1	0	0	0	0	1	2.52	2	2	1	0	0	0	0	1	1.93	2	2	1	0	0	0	0	1	2.98	2
0	85	6	2	155	35.9	14.9428	2007-08	24	23	-1	3	5	0	1	0	1	1	0	1	1	1.23	4		0	0	0	0	0			4		0	0	0	0	0			4		0	0	0	0	0			4
0	77	6	2	160	75	29.2969	2007-07	18	42	24	5	7	0	2	0	0	0	0	0	1	1.3	4		0	0	0	0	0					0	0	0	0	0					0	0	0	0	0
0	71	5	2	150.8	51.5	22.6467	2007-07	8	8	0	3	5	0	1	1	0	0	0	0	1	2.33	2	2	1	0	0	0	0	1	1.76	2	2	1	0	0	0	0	1	2.11	2	2	1	0	0	0	0	1	1.67	2
1	68	4	2	162.7	55.8	21.0794	2007-06	0	0	0	2	3	0	1	1	1	1	0	0	1	1.79	2	3	1	0	0	0	0	1	1.53	4		0	0	0	0	0			2	2	1	0	0	0	0	1	1.38	2
0	77	6	2	155.1	47.5	19.7456	2007-06	15	1	-14	4	6	0	1	1	0	0	0	0	1	2.41	2	2	1	0	0	0	0	1	1.96	2	2	1	0	0	0	0	1	1.79	2	2	1	0	0	0	0	1	1.37	2
0	56	2	1	165	71.7	26.3361	2007-06	1	0	-1	2	3	0	1	1	0	0	0	0	1	2.3	2	2	1	0	0	0	0	1	3.6	2	2	1	0	0	0	0	2		2	2	1	0	0	0	0	1	2.57	2
0	85	6	2	146	60.8	28.5232	2007-06	23	24	1	5	7	0	1	0	1	1	0	0	1	1.07	4		0	0	0	0	0			4		0	0	0	0	0			4		0	0	0	0	0			4
1	61	3	1	169	80.6	28.2203	2007-06	2	1	-1	3	3	0	1	1	0	0	0	0	1	2.46	2	2	1	0	0	0	0	1	1.63	2	2	1	0	0	0	0	1	1.76	2	3	0	1	1	1	0	1	1.08	4
0	68	4	2	160	54.35	21.2305	2007-06	4	0	-4	3	5	0	1	0	1	1	1	0	1	1.08	2	3	0	1	0	1	0	2		4		0	0	0	0	0			2	2	0	1	0	1	0	2		2
0	84	6	2	145	44.3	21.0702	2007-05	1	1	0	4	6	0	1	1	0	0	0	0	1	2.72	2	2	1	0	0	0	0	1	2.95	2	2	1	0	0	0	0	1	1.42	2	2	1	0	0	0	0	1	2.52	2
0	80	6	2	150	61.9	27.5111	2008-11	4	0	-4	4	6	0	1	1	0	0	0	0	1	1.84	2	2	1	0	0	0	0	1	2	2	2	1	0	0	0	0	1	2.15	2	2	1	0	0	0	0	1	1.9	2
0	91	6	2	150	50.8	22.5778	2007-05	22	17	-5	5	7	0	1	0	1	1	1	0	2		4		0	0	0	0	0			4		0	0	0	0	0			4		0	0	0	0	0			4
1	85	6	2	174	76.7	25.3336	2007-05	5	3	-2	4	5	0	1	1	0	0	0	0	1	2.62	4		0	0	0	0	0			2	2	1	0	0	0	0	1	1.25	2	2	1	0	0	0	0	1	2.18	2
0	81	6	2	150	52.8	23.4667	2007-05	23	16	-7	4	6	0	1	0	1	1	0	0	1	0.87	4		0	0	0	0	0			4		0	0	0	0	0			4		0	0	0	0	0			4
0	77	6	2	149	59	26.5754	2007-05	2	4	2	5	7	0	1	1	0	0	0	0	1	2.77	4		0	0	0	0	0			4	4	0	0	0	0	0	1	3.14			0	0	0	0	0
1	69	4	2	175.9	77.8	25.1448	2007-05	2	2	0	3	4	0	1	1	1	1	0	0	1	2.49	2	2	1	1	1	0	0	1	2.62	4		0	0	0	0	0			2	2	1	1	1	0	0	1	2.42	2
0	65	4	2	148.6	43.5	19.6993	2007-04	7	2	-5	3	5	0	1	0	1	1	0	0	1	1.05	2	3	1	0	0	0	0	1	3.43	2	2	1	0	0	0	0	1	4.03	2	2	1	0	0	0	0	1	1.46	2
0	75	6	2	150	54.1	24.0444	2007-04	17	1	-16	6	8	0	1	1	0	0	0	0	1	2.56	2	2	1	0	0	0	0	1	1.58	2	2	1	0	0	0	0	1	3.24	2	2	1	0	0	0	0	1	2.35	2
1	72	5	2	164.3	82	30.3766	2007-04	4	2	-2	2	3	0	1	1	0	0	0	0	1	2.36	2	2	1	0	0	0	0	1	3.56	4		0	0	0	0	0			4		0	0	0	0	0			4
0	82	6	2	155	44.4	18.4807	2007-03	7	7	0	4	6	0	1	1	0	0	0	0	1	2.45	2	2	1	0	0	0	0	1	3.48	4		0	0	0	0	0			4		0	0	0	0	0			4
1	66	4	2	159.7	43.7	17.1345	2007-03	10	6	-4	3	5	0	1	1	0	0	0	0	1	1.83	2	2	1	0	0	0	0	1	2.26	2	2	1	0	0	0	0	1	1.96	2	2	1	0	0	0	0	1	1.9	2
0	97	6	2	153	57.2	24.435	2008-11	6	4	-2	4	6	0	1	0	1	1	0	0	1	1.01	2	2	0	1	1	0	0	2		4		0	0	0	0	0			4		0	0	0	0	0			2
0	74	5	2	160	53.1	20.7422	2007-03	3	2	-1	4	6	0	1	0	1	0	1	0	1	1.07	4		0	0	0	0	0			4		0	0	0	0	0			4		0	0	0	0	0			4
1	76	6	2	161	67.2	25.9249	2007-03	7	0	-7	5	6	0	1	1	0	0	0	0	1	1.63	2	2	1	0	0	0	0	1	3.49	2	2	1	0	0	0	0	1	1.92	2	2	1	0	0	0	0	1	1.84	2
1	46	1	1	167.8	67.3	23.9018	2007-03	3	0	-3	4	4	0	1	1	0	0	0	0	1	1.55	2	2	1	0	0	0	0	1	1.75	2	2	1	0	0	0	0	1	3.39	2	2	1	0	0	0	0	1	1.04	2
1	71	5	2	160	53.9	21.0547	2007-03	7	27	20	4	6	0	1	1	0	0	0	0	1	1.88	2	4	0	0	0	0	0	2		4		0	0	0	0	0			4		0	0	0	0	0			2
1	58	2	1	165	62.4	22.9201	2007-02	13	8	-5	3	3	0	2	0	0	0	0	0	1	1.15	4		0	0	0	0	0			4		0	0	0	0	0			4		0	0	0	0	0			4
1	67	4	2	168.6	67.4	23.7107	2007-02	2	2	0	3	4	0	1	1	0	0	0	0	1	1.88	2	2	1	0	0	0	0	1	1.74	2	2	1	0	0	0	0	1	4.19	2	2	1	0	0	0	0	1	1.32	2
0	77	6	2	145.2	53.8	25.5181	2007-02	2	2	0	4	6	0	1	1	0	0	0	0	1	2.35	2	2	1	0	0	0	0	1	3.21	2	2	1	0	0	0	0	1	1.75	2	2	1	0	0	0	0	1	1.87	2
1	74	5	2	168	54.4	19.2744	2007-02	2	1	-1	3	4	0	1	1	0	0	0	0	1	2.19	2	2	1	0	0	0	0	1	2.15	2	2	1	0	0	0	0	1	1.51	2	2	1	0	0	0	0	1	2.51	2
1	76	6	2	166.3	59.5	21.5146	2007-02	3	0	-3	4	5	0	1	1	1	0	1	0	1	1.01	2	2	1	1	0	1	0	1	1.52	4		0	0	0	0	0			4		0	0	0	0	0			4
0	65	4	2	157.3	67.1	27.1185	2007-01	19	2	-17	4	6	0	1	1	0	0	0	0	1	2.17	2	2	1	0	0	0	0	1	2.45	4		0	0	0	0	0			4		0	0	0	0	0			2
0	66	4	2	163	63.2	23.7871	2008-11	17	7	-10	3	5	0	1	1	0	0	0	0	1	2.32	2	2	1	0	0	0	0	1	1.91	4		0	0	0	0	0			2	2	1	0	0	0	0	1	1.99	4
1	60	3	1	170	56.5	19.5502	2007-01	3	3	0	2	2	0	1	1	0	0	0	0	1	2.1	2	2	1	0	0	0	0	1	1.97	4		0	0	0	0	0			2	2	1	0	0	0	0	1	1.71	2
0	72	5	2	155.6	45.7	18.8754	2006-12	18	15	-3	3	5	0	1	1	0	0	0	0	1	2.25	4		0	0	0	0	0			4		0	0	0	0	0			4		0	0	0	0	0			4
0	80	6	2	155	51.7	21.5193	2006-12	23	42	19	4	6	0	2	0	0	0	0	0	1	1.77	4		0	0	0	0	0					0	0	0	0	0					0	0	0	0	0
1	83	6	2	99999	55.8		2006-12	23	21	-2	3	4	0	2	0	0	0	0	0	1	1.16	4		0	0	0	0	0			4		0	0	0	0	0			4		0	0	0	0	0
0	87	6	2	99999	47		2006-12	24	42	18	3	5	0	2	0	0	0	0	0	1	1.05	4		0	0	0	0	0					0	0	0	0	0					0	0	0	0	0
1	78	6	2	158	51.9	20.7899	2006-12	11	8	-3	5	6	0	1	1	0	0	0	0	1	2.34	3	4	0	0	0	0	0	1	1.17	2	3	1	0	0	0	0	1	4.13	2	2	1	0	0	0	0	1	2.94	2
1	84	6	2	153.9	52.6	22.208	2006-11	10	7	-3	3	5	0	1	1	0	0	0	0	1	1.92	2	2	1	0	0	0	0	1	2.56	2	2	1	0	0	0	0	1	2.38	2	2	1	0	0	0	0	1	2.02	2
1	85	6	2	167	51.2	18.3585	2006-11	2	1	-1	4	5	0	1	1	0	0	0	0	1	4.15	4		0	0	0	0	0			4		0	0	0	0	0			4		0	0	0	0	0			4
1	68	4	2	165.9	54.9	19.9471	2006-11	3	3	0	4	5	0	1	1	0	0	0	0	1	2.2	4		0	0	0	0	0			4		0	0	0	0	0			4		0	0	0	0	0			4
1	48	1	1	170	73	25.2595	2006-11	1	2	1	2	2	0	1	0	1	1	1	0	1	0.98	2	2	0	1	1	1	0	2		4		0	0	0	0	0			2	2	0	1	1	1	0	2		2
0	69	4	2	140	41.1	20.9694	2008-10	1	14	13	3	5	0	1	0	1	1	1	0	2		4		0	0	0	0	0			2	3	1	0	0	0	0	1	2.42	2	2	1	0	0	0	0	1	1.5	2
0	60	3	1	158	47.1	18.8672	2006-11	10	5	-5	2	3	0	1	1	0	0	0	0	1	2.31	2	2	1	0	0	0	0	1	2.6	4		0	0	0	0	0			2	2	1	0	0	0	0	1	1.5	2
0	67	4	2	150	55.8	24.8	2008-10	17	23	6	2	4	0	1	1	0	0	0	0	1	1.18	4		0	0	0	0	0			4		0	0	0	0	0			4		0	0	0	0	0			4
1	59	2	1	176	90.1	29.087	2008-10	16	24	8	4	4	0	2	0	0	0	0	0	1	1.33	4		0	0	0	0	0			4		0	0	0	0	0			4		0	0	0	0	0
1	83	6	2	175	64.8	21.1592	2008-10	6	7	1	3	4	0	1	1	0	0	0	0	1	2.19	2	2	1	0	0	0	0	1	2.89	4		0	0	0	0	0			2	2	1	0	0	0	0	1	2.53	3
1	81	6	2	99999	56.3		2008-10	2	2	0	4	5	0	2	0	0	0	0	0	1	1.38	4		0	0	0	0	0			4		0	0	0	0	0			4		0	0	0	0	0			4
0	79	6	2	157	48.7	19.7574	2008-12	6	1	-5	5	7	0	1	1	0	0	0	0	1	3.13	2	2	1	0	0	0	0	1	3.62	4		0	0	0	0	0			4		0	0	0	0	0			2
1	54	1	1	166.8	72.3	25.9864	2008-10	2	2	0	4	4	0	1	0	1	1	0	0	1	1.02	2	3	0	1	1	1	0	2		2	2	0	1	1	1	0	1	1.03	4		0	0	0	0	0			2
1	59	2	1	168	67.4	23.8804	2008-10	21	20	-1	4	4	0	1	1	0	0	0	0	1	2.47	2	2	1	0	0	0	0	2		4		0	0	0	0	0			4		0	0	0	0	0			4
1	52	1	1	166.8	79.3	28.5024	2008-10	11	0	-11	2	4	0	1	1	1	1	1	0	1	1.85	2	2	1	1	1	1	0	1	2.42	4		0	0	0	0	0			2	2	1	1	1	1	0	1	2.36	2
1	73	5	2	168	70	24.8016	2008-10	3	1	-2	3	4	0	1	1	0	0	0	0	1	2.72	2	2	1	0	0	0	0	1	1.23	2	2	1	0	0	0	0	1	1.92	2	2	1	0	0	0	0	1	1.33	2
0	60	3	1	156.3	63.3	25.9111	2008-10	17	3	-14	2	3	0	1	1	0	0	0	0	1	2.51	2	2	1	0	0	0	0	1	2.66	4		0	0	0	0	0			2	2	1	0	0	0	0	1	2.25	2
0	80	6	2	158	48.1	19.2677	2008-10	19	29	10	4	6	0	1	1	0	0	0	0	1	2.89	4		0	0	0	0	0			4		0	0	0	0	0			4		0	0	0	0	0			4
0	86	6	2	155	56.7	23.6004	2008-09	1	5	4	4	6	0	1	1	0	0	0	0	1	3.37	2	2	1	0	0	0	0	1	2.2	2	2	1	0	0	0	0	1	2.07	4		0	0	0	0	0			2
1	61	3	1	166	66	23.9512	2008-09	4	1	-3	4	4	0	1	1	1	1	0	0	1	2.74	2	3	1	0	0	0	0	1	1.57	2	2	1	0	0	0	0	1	1.28	2	2	1	0	0	0	0	1	1.4	2
1	78	6	2	163	65.9	24.8033	2008-09	9	7	-2	3	4	0	1	1	0	0	0	0	1	2.81	2	2	1	0	0	0	0	1	2.65	2	2	1	0	0	0	0	1	1.98	2	2	1	0	0	0	0	1	2.18	2
1	81	6	2	166	70.1	25.4391	2008-09	3	3	0	5	6	0	1	1	0	0	0	0	1	2.26	4		0	0	0	0	0			2	2	1	0	0	0	0	1	1.33	4		0	0	0	0	0			2
1	53	1	1	169.7	65.8	22.8487	2008-12	3	0	-3	2	2	0	1	1	0	0	0	0	1	3.37	2	2	1	0	0	0	0	1	3.9	4		0	0	0	0	0			2	2	1	0	0	0	0	1	3.42	4
0	79	6	2	143.6	39.5	19.1553	2008-09	12	18	6	4	6	0	1	0	1	1	0	0	1	1.1	4		0	0	0	0	0			4		0	0	0	0	0			4		0	0	0	0	0			4
0	73	5	2	157	54.7	22.1916	2008-09	16	8	-8	4	6	0	1	1	0	0	0	0	1	3.7	4		0	0	0	0	0			4		0	0	0	0	0			4		0	0	0	0	0			4
1	57	2	1	167.5	75.6	26.9459	2008-09	2	2	0	4	4	0	1	0	1	1	1	0	1	0.96	2	2	0	1	1	1	0	2		4		0	0	0	0	0			2	2	0	1	1	1	0	1	1	3
0	59	2	1	160	53.7	20.9766	2008-09	1	1	0	2	3	0	1	1	0	0	0	0	1	2.54	2	2	1	0	0	0	0	1	1.32	2	2	1	0	0	0	0	1	1.83	2	2	1	0	0	0	0	1	2.94	2
0	58	2	1	155	60.2	25.0572	2008-09	5	5	0	2	3	0	1	1	0	0	0	0	1	1.16	4		0	0	0	0	0			3	2	1	0	0	0	0	1	1.99	2	3	0	1	0	1	0	1	1.05	2
1	87	6	2	163	63.8	24.0129	2008-09	15	4	-11	5	7	0	1	1	0	0	0	0	1	1.35	4		0	0	0	0	0			4		0	0	0	0	0			4		0	0	0	0	0			4
1	68	4	2	169.6	73.4	25.5179	2008-08	13	6	-7	2	3	0	1	1	0	0	0	0	1	1.95	2	2	1	0	0	0	0	1	2.55	4		0	0	0	0	0			2	2	1	0	0	0	0	1	2.46	2
0	90	6	2	163	41.5	15.6197	2008-08	6	6	0	5	7	0	1	1	0	0	0	0	1	1.94	2	2	1	0	0	0	0	2		4		0	0	0	0	0			4		0	0	0	0	0
0	56	2	1	162	79	30.1021	2008-08	33	42	9	5	6	0	2	0	0	0	0	0	2		4		0	0	0	0	0					0	0	0	0	0					0	0	0	0	0
1	78	6	2	155.6	46.6	19.2472	2008-08	4	2	-2	5	6	0	1	0	1	1	0	0	1	1.47	4		0	0	0	0	0					0	0	0	0	0					0	0	0	0	0
1	80	6	2	162	54.9	20.9191	2008-12	15	17	2	4	5	0	2	0	0	0	0	0	1	1.04	4		0	0	0	0	0					0	0	0	0	0					0	0	0	0	0
0	75	6	2	149.4	58.5	26.2093	2008-07	16	4	-12	4	6	0	1	1	0	0	0	0	1	2.21	3	2	1	0	0	0	0	1	9.84	2	2	1	0	0	0	0	1	4.58	2	2	1	0	0	0	0	1	1.48	2
0	83	6	2	146	49.7	23.3158	2008-07	2	1	-1	5	7	0	1	1	0	0	0	0	1	2.09	2	2	1	0	0	0	0	1	2.67	2	2	1	0	0	0	0	1	8.57	2	2	1	0	0	0	0	1	1.45	2
0	82	6	2	136.2	39.3	21.1855	2008-07	5	42	37	6	8	0	1	0	1	1	1	0	1	1.04	4		0	0	0	0	0					0	0	0	0	0					0	0	0	0	0
1	87	6	2	168	58.3	20.6562	2008-07	3	3	0	3	4	0	1	1	1	1	0	0	1	1.75	2	2	1	1	1	0	0	1	2.95	2	2	1	1	1	0	0	1	1.79	2	2	1	1	1	0	0	1	1.79	2
1	75	6	2	168	56.6	20.0539	2008-07	32	35	3	6	7	0	1	1	1	1	0	0	1	3.13	4		0	0	0	0	0			4		0	0	0	0	0			4		0	0	0	0	0			4
0	79	6	2	159	56	22.151	2008-07	16	14	-2	4	6	0	1	1	0	0	0	0	1	2.13	4		0	0	0	0	0			2	2	1	0	0	0	0	2		4		0	0	0	0	0			4
1	80	6	2	160	48.9	19.1016	2008-07	21	31	10	3	4	0	2	0	0	0	0	0	1	1.89	4		0	0	0	0	0			4		0	0	0	0	0			4		0	0	0	0	0			4
1	66	4	2	174	79.8	26.3575	2008-07	15	12	-3	4	6	0	1	1	0	0	0	0	1	2.36	4		0	0	0	0	0			4		0	0	0	0	0			2	2	1	0	0	0	0	1	2.9	4
0	82	6	2	149.7	55	24.5425	2008-06	3	1	-2	4	6	0	1	1	0	0	0	0	1	2.47	2	2	1	0	0	0	0	1	2.32	2	2	1	0	0	0	0	1	1.19	2	2	1	0	0	0	0	1	3.37	2
0	73	5	2	160	59	23.0469	2008-06	1	1	0	2	4	0	1	1	0	0	0	0	1	2.16	2	2	1	0	0	0	0	1	3.01	2	2	1	0	0	0	0	1	2.58	2	2	1	0	0	0	0	1	2.58	2
0	77	6	2	158	51.2	20.5095	2008-12	20	20	0	4	6	0	1	0	1	0	1	0	1	1.03	4		0	0	0	0	0			4		0	0	0	0	0			4		0	0	0	0	0			4
1	57	2	1	170	82	28.3737	2008-06	5	5	0	2	2	0	1	1	0	0	0	0	1	2.18	4		0	0	0	0	0			4		0	0	0	0	0			4		0	0	0	0	0			4
0	86	6	2	145	43.6	20.7372	2008-06	12	25	13	5	7	0	1	0	1	1	1	0	1	0.93	4		0	0	0	0	0			4		0	0	0	0	0			4		0	0	0	0	0
1	53	1	1	164.5	72.1	26.6442	2008-06	4	3	-1	4	4	0	1	1	0	0	0	0	1	1.84	2	2	1	0	0	0	0	1	4.62	2	2	1	0	0	0	0	1	1.91	2	2	1	0	0	0	0	1	1.7	2
1	62	3	1	164	63.1	23.4607	2008-06	2	16	14	4	4	0	2	0	0	0	0	0	1	1.14	4		0	0	0	0	0			4		0	0	0	0	0			4		0	0	0	0	0
1	72	5	2	171	78.9	26.9827	2008-06	4	1	-3	4	5	0	1	1	0	0	0	0	1	1.76	2	2	1	0	0	0	0	1	1.1	4		0	0	0	0	0			4		0	0	0	0	0			4
1	59	2	1	168	51.8	18.3532	2008-06	19	7	-12	2	2	0	1	1	0	0	0	0	1	3.04	2	2	1	0	0	0	0	1	2.16	4		0	0	0	0	0			2	2	1	0	0	0	0	1	1.86	2
0	83	6	2	150	43.6	19.3778	2008-06	13	11	-2	4	6	0	1	1	0	0	0	0	1	3.02	4		0	0	0	0	0			4		0	0	0	0	0			4		0	0	0	0	0			4
0	68	4	2	155	60.8	25.307	2008-06	4	0	-4	3	5	0	1	1	1	1	0	0	1	1.98	4		0	0	0	0	0			2	3	1	0	0	0	0	1	1.62	2	2	1	0	0	0	0	1	2.41	2
1	65	4	2	180.7	88.8	27.1955	2008-05	1	1	0	3	4	0	1	1	0	0	0	0	1	2.03	2	2	1	0	0	0	0	1	2.95	2	2	1	0	0	0	0	1	1.53	2	2	1	0	0	0	0	1	1.2	2
1	84	6	2	166.7	65.3	23.4986	2008-05	5	16	11	4	5	0	1	0	1	1	0	0	2		2	2	0	1	1	0	0	2		4		0	0	0	0	0			4		0	0	0	0	0			2
0	79	6	2	153	41.1	17.5573	2008-12	13	11	-2	4	6	0	1	0	1	1	1	0	1	1	4		0	0	0	0	0			3	2	0	1	1	1	0	1	1.21	3	2	0	1	1	1	0	1	0.98	2
0	77	6	2	153	55.2	23.5807	2008-05	4	2	-2	4	6	0	1	1	0	0	0	0	1	3.04	2	2	1	0	0	0	0	1	2.13	2	2	1	0	0	0	0	1	1.58	2	2	1	0	0	0	0	1	1.76	2
0	67	4	2	153	49.2	21.0176	2008-05	1	0	-1	3	5	0	1	1	0	0	0	0	1	2.41	2	2	1	0	0	0	0	1	1.9	2	2	1	0	0	0	0	1	1.77	2	2	1	0	0	0	0	1	2.77	2
0	95	6	2	150	55.6	24.7111	2008-05	21	42	21	4	6	0	2	0	0	0	0	0	2		4		0	0	0	0	0					0	0	0	0	0					0	0	0	0	0
0	75	6	2	156	48.1	19.765	2008-04	17	11	-6	5	7	0	1	1	0	0	0	0	1	1.03	4		0	0	0	0	0			4		0	0	0	0	0			4		0	0	0	0	0			4
1	36	1	1	170.3	69.9	24.1017	2008-04	1	0	-1	2	2	0	1	1	1	1	0	0	1	1.05	4		0	0	0	0	0	1	1.32	2	3	1	1	0	1	0	1	1.41	4		0	0	0	0	0			2
0	74	5	2	153	38.4	16.4039	2008-04	21	18	-3	3	5	0	1	1	0	0	0	0	1	1.52	4		0	0	0	0	0			2	4	0	0	0	0	0	2		2	4	0	0	0	0	0	1	1.31	4
0	93	6	2	140	38.7	19.7449	2008-04	4	4	0	3	5	0	1	0	1	1	0	0	2		2	3	0	1	0	1	0	2		4		0	0	0	0	0			2	2	0	1	0	1	0	2		2
0	91	6	2	142.7	44.3	21.7548	2008-04	27	42	15	3	5	0	2	0	0	0	0	0	1	0.91	4		0	0	0	0	0					0	0	0	0	0					0	0	0	0	0
0	82	6	2	99999	48.9		2008-04	21	6	-15	4	6	0	1	1	0	0	0	0	1	2.59	2	2	1	0	0	0	0	1	4.27	2	2	1	0	0	0	0	1	2.42	2	2	1	0	0	0	0	1	1.33	4
0	78	6	2	99999	42.4		2008-04	20	24	4	4	6	0	1	0	1	1	1	0	2		2	2	0	1	1	1	0	2		4		0	0	0	0	0			2	2	0	1	1	1	0	1	1.07	2
0	50	1	1	160	50.8	19.8438	2008-11	23	23	0	3	4	0	1	1	1	1	1	0	1	1.47	3	3	1	0	0	0	0	1	2.19	3	2	1	0	0	0	0	1	2.15	2	2	1	0	0	0	0	1	2.75	2
0	75	6	2	99999	46.9		2008-04	17	35	18	3	5	0	2	0	0	0	0	0	1	1.09	4		0	0	0	0	0			4		0	0	0	0	0			4		0	0	0	0	0			4
0	42	1	1	163.7	63.1	23.5468	2008-03	17	0	-17	2	3	0	1	1	0	0	0	0	1	2.92	2	2	1	0	0	0	0	1	2.95	2	2	1	0	0	0	0	1	1.17	2	2	1	0	0	0	0	1	3.31	2
1	77	6	2	162	68.8	26.2155	2008-03	8	3	-5	4	5	0	1	1	0	0	0	0	1	1.91	2	2	1	0	0	0	0	1	3.49	2	2	1	0	0	0	0	1	1.29	4		0	0	0	0	0			4
1	79	6	2	99999	39.6		2008-03	21	14	-7	4	5	0	1	1	0	0	0	0	1	3.63	2	4	0	0	0	0	0	2		4		0	0	0	0	0			4		0	0	0	0	0			4
1	83	6	2	170	66.1	22.872	2008-03	19	22	3	4	5	0	1	1	0	0	0	0	1	2.09	4		0	0	0	0	0			4		0	0	0	0	0			4		0	0	0	0	0			4
1	78	6	2	169	49.6	17.3663	2008-03	17	12	-5	5	6	0	1	1	0	0	0	0	1	2.48	4		0	0	0	0	0			4		0	0	0	0	0			4		0	0	0	0	0			4
0	78	6	2	150	40.1	17.8222	2008-03	18	19	1	5	7	0	1	0	1	1	0	0	1	0.9	2	2	0	1	1	0	0	2		4		0	0	0	0	0			4		0	0	0	0	0			4
1	80	6	2	170	47.9	16.5744	2008-02	15	18	3	4	5	0	1	0	1	1	1	0	1	1.04	4		0	0	0	0	0			2	4	0	0	0	0	0	2		4		0	0	0	0	0			4
0	79	6	2	155	51.2	21.3111	2008-02	19	15	-4	4	6	0	1	0	1	1	1	0	1	0.97	2	4	0	0	0	0	0	2		4		0	0	0	0	0			4		0	0	0	0	0			4
0	72	5	2	158	53.5	21.4309	2008-02	7	6	-1	2	4	0	1	1	0	0	0	0	1	2.75	2	2	1	0	0	0	0	1	1.64	2	2	1	0	0	0	0	1	1.86	2	2	1	0	0	0	0	1	2.87	2
0	75	6	2	150	37.7	16.7556	2008-11	21	20	-1	4	6	0	2	0	0	0	0	0	1	2.75	4		0	0	0	0	0					0	0	0	0	0					0	0	0	0	0
1	80	6	2	163	50.7	19.0824	2008-02	1	1	0	4	5	0	1	1	1	1	0	0	1	2	2	2	1	1	1	0	0	1	4.27	2	2	1	1	1	0	0	1	3.06	2	2	1	1	1	0	0	2		2
1	69	4	2	178.3	71.2	22.3964	2008-01	5	4	-1	2	3	0	1	1	0	0	0	0	1	3.07	2	2	1	0	0	0	0	1	4.87	2	2	1	0	0	0	0	1	1.93	2	2	1	0	0	0	0	1	2.68	2
0	77	6	2	141.4	43	21.5065	2008-01	7	5	-2	4	6	0	1	1	0	0	0	0	1	2.43	3	2	1	0	0	0	0	1	2.32	2	2	1	0	0	0	0	1	5.91	2	2	1	0	0	0	0	1	0.93	4
1	80	6	2	171	59.5	20.3481	2008-01	2	0	-2	4	5	0	1	1	0	0	0	0	1	2.26	2	2	1	0	0	0	0	1	3.42	2	2	1	0	0	0	0	1	1.96	2	2	1	0	0	0	0	1	1.94	2
1	67	4	2	170	88.8	30.7266	2008-01	16	23	7	5	6	0	1	0	1	1	1	0	1	2.46	4		0	0	0	0	0					0	0	0	0	0					0	0	0	0	0
1	86	6	2	171	49.8	17.0309	2007-12	17	17	0	4	5	0	1	1	0	0	0	0	1	2.11	4		0	0	0	0	0			4		0	0	0	0	0			4		0	0	0	0	0			4
0	86	6	2	148.7	34.8	15.7383	2007-12	19	21	2	5	7	0	1	1	0	0	0	0	1	1.61	4		0	0	0	0	0			4		0	0	0	0	0			4		0	0	0	0	0			4
1	63	3	1	165	80.1	29.4215	2007-12	5	2	-3	3	3	0	1	0	1	1	1	0	1	0.89	4		0	0	0	0	0			4		0	0	0	0	0			4		0	0	0	0	0			4
0	79	6	2	149.2	48.5	21.7873	2007-12	20	3	-17	3	5	0	1	0	1	1	1	0	2		2	3	0	1	1	0	0	2		2	2	0	1	1	0	0	2		4		0	0	0	0	0			4
1	84	6	2	172	70.1	23.6952	2007-12	18	16	-2	4	5	0	1	0	1	0	1	0	2		4		0	0	0	0	0			4		0	0	0	0	0			4		0	0	0	0	0
1	63	3	1	167	61	21.8724	2008-11	0	0	0	3	4	0	1	1	1	1	0	0	1	2.02	2	2	1	1	1	0	0	1	2.35	2	2	1	1	1	0	0	1	2.25	4		0	0	0	0	0			2
0	77	6	2	150	52.8	23.4667	2007-12	16	11	-5	4	6	0	1	0	1	1	0	0	1	1.09	4		0	0	0	0	0			4		0	0	0	0	0			4		0	0	0	0	0			4
0	77	6	2	158	49.5	19.8286	2007-12	6	9	3	4	6	0	1	0	1	1	1	0	2		4		0	0	0	0	0			4		0	0	0	0	0			4		0	0	0	0	0			4
1	81	6	2	170	75	25.9516	2007-12	0	0	0	4	5	0	1	1	1	1	1	0	1	2.4	2	4	0	0	0	0	0	1	3.59	4		0	0	0	0	0			4		0	0	0	0	0			4
0	84	6	2	150	44.5	19.7778	2007-11	12	18	6	5	8	0	1	0	1	1	1	0	1	1.38	3	2	0	1	1	1	0	1	1.12	3	2	0	1	1	1	0	1	1.13	3	2	0	1	1	1	0	1	1.05	4
1	71	5	2	165	59.3	21.7815	2007-11	4	4	0	2	3	0	1	1	0	0	0	0	1	1.9	2	2	1	0	0	0	0	1	1.16	2	2	1	0	0	0	0	1	3.84	2	2	1	0	0	0	0	1	1.36	2
1	59	2	1	163.7	75.3	28.0994	2007-11	9	3	-6	2	2	0	1	1	0	0	0	0	1	2.18	2	2	1	0	0	0	0	1	2.63	4		0	0	0	0	0			2	2	1	0	0	0	0	1	2.64	2
1	80	6	2	162.5	56	21.2071	2007-11	2	0	-2	5	6	0	1	1	0	0	0	0	1	4.09	2	2	1	0	0	0	0	1	1.44	4		0	0	0	0	0			2	2	1	0	0	0	0	1	1.74	2
0	57	2	1	152.7	54.2	23.2446	2007-11	26	23	-3	2	3	0	1	0	1	1	0	0	1	1	4		0	0	0	0	0			4		0	0	0	0	0			4		0	0	0	0	0			4
1	75	6	2	175	66.6	21.7469	2007-10	1	0	-1	5	6	0	1	1	1	1	0	0	1	2.07	2	2	1	1	1	0	0	1	3.43	2	2	1	1	1	0	0	1	2.02	2	2	1	1	1	0	0	1	1.92	2
1	87	6	2	168	58.1	20.5853	2007-10	6	8	2	5	6	0	1	1	0	0	0	0	1	2.03	4		0	0	0	0	0			4		0	0	0	0	0			2	2	1	0	0	0	0	1	1.19	2
0	93	6	2	145	45	21.4031	2008-12	3	0	-3	4	6	0	1	1	0	0	0	0	1	3.74	2	2	1	0	0	0	0	1	3.37	2	2	1	0	0	0	0	1	2.53	2	2	1	0	0	0	0	2		2
1	70	5	2	173	68	22.7204	2008-09	16	99		3	4	0	1	1	0	0	0	0	1	1.68	2	2	1	0	0	0	0	1	1.4	2	2	1	0	0	0	0	1	5.21	4		0	0	0	0	0			4
0	64	3	1	156	65	26.7094	2006-04	0	0	0	3	4	0	1	1	0	0	0	0	1	1.6	2	2	1	0	0	0	0	1	3.27	2	2	1	0	0	0	0	1	2.69	2	2	1	0	0	0	0	1	1.86	2
1	66	4	2	170	75	25.9516	2006-03	16	4	-12	2	3	0	1	1	0	0	0	0	1	2.84	2	2	1	0	0	0	0	1	1.98	4		0	0	0	0	0			2	2	1	0	0	0	0	1	1.91	2
1	62	3	1	169	95	33.2621	2006-03	1	0	-1	3	3	0	1	1	0	0	0	0	1	2.22	2	2	1	0	0	0	0	1	1.41	4		0	0	0	0	0			2	2	1	0	0	0	0	1	2.28	2
0	79	6	2	99999	99999		2006-03	21	7	-14	4	6	0	1	1	0	0	0	0	1	2.31	4		0	0	0	0	0			4		0	0	0	0	0			2	3	1	1	0	0	1	1	1.06	3
0	73	5	2	163	65	24.4646	2006-03	24	99		2	4	0	1	1	0	0	0	0	1	1.53	4		0	0	0	0	0			4		0	0	0	0	0			4		0	0	0	0	0			4
1	80	6	2	170	68	23.5294	2006-01	13	99		4	5	0	1	1	0	0	0	0	1	2.44	4		0	0	0	0	0			4		0	0	0	0	0			4		0	0	0	0	0			4
1	70	5	2	167	57	20.4382	2006-02	5	2	-3	3	4	0	1	1	0	0	0	0	1	2.66	2	2	1	0	0	0	0	1	2.34	2	2	1	0	0	0	0	1	3.37	2	2	1	0	0	0	0	1	1.62	2
1	61	3	1	174	81	26.7539	2005-11	19	9	-10	4	4	0	1	1	0	0	0	0	1	2.29	2	2	1	0	0	0	0	1	1.98	2	2	1	0	0	0	0	1	3.55	2	2	1	0	0	0	0	1	2.79	2
0	78	6	2	99999	99999		2005-12	9	99		3	5	0	1	1	0	0	0	0	1	2.96	2	2	1	0	0	0	0	1	2.29	2	2	1	0	0	0	0	1	8.06	2	2	1	0	0	0	0	1	1.85	2
0	64	3	1	155	57	23.7253	2005-12	17	7	-10	2	3	0	1	1	0	0	0	0	1	2.32	2	2	1	0	0	0	0	2		4		0	0	0	0	0			4		0	0	0	0	0			4
1	76	6	2	172	75	25.3515	2008-11	2	0	-2	3	4	0	1	1	0	0	0	0	1	1.19	2	2	1	0	0	0	0	1	2.6	2	2	1	0	0	0	0	1	1.83	2	2	1	0	0	0	0	1	1.64	2
0	78	6	2	158	53	21.2306	2005-12	2	0	-2	6	8	0	1	1	0	0	0	0	1	2.77	2	2	1	0	0	0	0	1	1.02	2	2	1	0	0	0	0	2		2	2	1	0	0	0	0	1	1.84	4
1	73	5	2	172	70	23.6614	2005-11	11	3	-8	3	4	0	1	1	0	0	0	0	1	3.32	2	3	0	1	1	1	0	2		2	2	0	1	1	1	0	2		2	2	0	1	1	1	0	2		2
1	47	1	1	99999	99999		2005-11	11	5	-6	5	5	0	1	1	0	0	0	0	1	1.63	2	2	1	0	0	0	0	1	1.26	2	2	1	0	0	0	0	1	1.46	2	2	1	0	0	0	0	1	1.94	2
1	70	5	2	167	90	32.2708	2005-10	2	2	0	4	5	0	1	1	0	0	0	0	1	1.95	2	2	1	0	0	0	0	1	2.26	2	2	1	0	0	0	0	1	1.94	2	2	1	0	0	0	0	1	1.09	2
1	77	6	2	160	53	20.7031	2005-09	21	99		5	6	0	1	1	0	0	0	0	1	2.77	4		0	0	0	0	0			4		0	0	0	0	0			4		0	0	0	0	0			4
1	81	6	2	99999	99999		2005-09	24	99		4	5	0	1	1	0	0	0	0	1	1.83	2	2	1	0	0	0	0	1	2.98	2	2	1	0	0	0	0	1	3.23	2	2	1	0	0	0	0	1	2.04	2
0	90	6	2	150	45	20	2005-08	16	99		3	5	0	1	0	1	1	0	0	2		4		0	0	0	0	0			2	2	0	1	1	0	0	2		2	2	0	1	1	0	0	2		2
0	68	4	2	99999	99999		2005-08	22	21	-1	3	5	0	1	1	0	0	0	0	1	1.79	2	2	1	0	0	0	0	1	3.07	2	2	1	0	0	0	0	2		4		0	0	0	0	0			2
1	66	4	2	167	50.8	18.2151	2005-08	4	2	-2	3	4	0	1	1	0	0	0	0	1	1.89	2	2	1	0	0	0	0	1	4.19	4		0	0	0	0	0			2	2	1	0	0	0	0	1	2.35	2
0	75	6	2	155	60	24.974	2005-07	12	3	-9	5	7	0	1	1	0	0	0	0	1	2.37	2	2	1	0	0	0	0	1	1.85	2	2	1	0	0	0	0	1	1.12	2	3	0	1	0	1	0	1	1.19	2
1	65	4	2	165	65	23.8751	2008-08	14	6	-8	4	5	0	1	1	0	0	0	0	1	1.51	2	2	1	0	0	0	0	1	2.28	4		0	0	0	0	0			4		0	0	0	0	0			2
0	76	6	2	99999	99999		2005-07	16	20	4	4	6	0	1	0	1	0	0	1	2		4		0	0	0	0	0			4		0	0	0	0	0			4		0	0	0	0	0			4
1	63	3	1	160	60	23.4375	2005-06	16	5	-11	3	3	0	1	0	1	0	1	0	2		2	2	0	1	0	1	0	2		2	4	0	0	0	0	0	2		4		0	0	0	0	0			4
0	82	6	2	99999	99999		2005-06	13	99		4	6	0	1	1	0	0	0	0	1	1.77	4		0	0	0	0	0			2	3	0	1	1	0	0	2		4		0	0	0	0	0			4
0	77	6	2	99999	68		2005-06	7	0	-7	4	6	0	1	1	0	0	0	0	1	2.06	2	2	1	0	0	0	0	1	1.61	2	3	0	1	0	1	0	1	1.48	2	2	0	1	0	1	0	2		2
0	81	6	2	99999	99999		2005-05	14	99		5	7	0	1	0	1	1	1	0	2		2	2	0	1	1	1	0	2		4		0	0	0	0	0			4		0	0	0	0	0			4
0	85	6	2	156	50	20.5457	2005-04	21	16	-5	4	6	0	1	1	0	0	0	0	1	2.01	4		0	0	0	0	0			4		0	0	0	0	0			4		0	0	0	0	0			4
0	64	3	1	165	72	26.4463	2005-05	8	5	-3	3	4	0	1	1	1	1	0	0	1	1.78	2	3	1	0	0	0	0	1	2.67	2	2	1	0	0	0	0	1	2.16	2	2	1	0	0	0	0	1	1.86	2
0	62	3	1	154	47	19.8178	2005-04	8	1	-7	5	6	0	1	1	0	0	0	0	1	1.13	4		0	0	0	0	0			4		0	0	0	0	0			4		0	0	0	0	0			3
1	73	5	2	162	74	28.1969	2005-04	18	99		3	4	0	1	1	0	0	0	0	1	1.85	2	2	1	0	0	0	0	1	1.86	2	2	1	0	0	0	0	1	1.82	2	2	1	0	0	0	0	1	1.73	2
0	70	5	2	158	99999		2005-04	99	99		3	5	0	1	0	1	1	1	0	2		2	2	0	1	1	1	0	2		2	2	0	1	1	1	0	2		2	2	0	1	1	1	0	2		4
0	76	6	2	99999	99999		2008-10	8	0	-8	5	7	0	1	1	0	0	0	0	1	2.13	2	2	1	0	0	0	0	1	2.72	2	2	1	0	0	0	0	1	1.77	2	2	1	0	0	0	0	1	1.66	2
0	81	6	2	99999	99999		2005-04	2	2	0	4	6	0	1	0	1	1	1	0	1	1	2	3	1	0	0	0	0	1	3.58	2	2	1	0	0	0	0	1	1.96	2	2	1	0	0	0	0	1	2.42	2
0	67	4	2	156	94	38.6259	2005-03	0	0	0	4	6	0	1	1	1	1	0	0	1	1.54	2	2	1	1	1	0	0	1	1.19	2	2	1	1	1	0	0	1	1.11	2	2	1	1	1	0	0	1	1.8	2
1	62	3	1	161	62	23.9188	2005-03	0	0	0	2	2	0	1	1	0	0	0	0	1	2	2	2	1	0	0	0	0	1	2.25	2	2	1	0	0	0	0	1	2.16	2	2	1	0	0	0	0	1	2.05	2
1	72	5	2	170	70	24.2215	2005-02	18	99		4	5	0	1	1	0	0	0	0	1	1.64	2	2	1	0	0	0	0	1	2.79	2	2	1	0	0	0	0	1	1.26	2	2	1	0	0	0	0	1	1.27	2
0	71	5	2	99999	99999		2005-01	16	8	-8	2	4	0	1	0	1	0	1	0	2		2	2	0	1	0	1	0	2		4		0	0	0	0	0			4		0	0	0	0	0			4
0	77	6	2	165	55	20.202	2005-01	20	99		4	6	0	1	1	0	0	0	0	1	1.91	2	2	1	0	0	0	0	1	2.12	2	2	1	0	0	0	0	1	1.83	2	2	1	0	0	0	0	1	1.5	2
1	71	5	2	171	99999		2004-11	19	4	-15	2	3	0	1	1	0	0	0	0	1	3.02	2	2	1	0	0	0	0	1	3.34	4		0	0	0	0	0			4		0	0	0	0	0			4
0	71	5	2	153	99999		2004-12	15	99		3	5	0	1	1	0	0	0	0	1	1.83	2	2	1	0	0	0	0	1	1.82	2	2	1	0	0	0	0	1	1.59	2	2	1	0	0	0	0	1	2.13	2
1	66	4	2	170	58	20.0692	2004-10	6	4	-2	3	4	0	1	1	0	0	0	0	1	2.31	4		0	0	0	0	0			2	2	1	0	0	0	0	1	2.85	4		0	0	0	0	0			4
1	68	4	2	170	71.9	24.8789	2004-11	14	2	-12	3	5	0	1	1	0	0	0	0	1	2.46	4		0	0	0	0	0			4		0	0	0	0	0			4		0	0	0	0	0			4
1	85	6	2	176	70	22.5981	2008-10	7	4	-3	5	7	0	1	0	1	1	0	0	1	1.7	2	2	0	1	1	0	0	2		2	3	1	0	0	0	0	2		2	2	1	0	0	0	0	2		2
1	67	4	2	173	75	25.0593	2004-10	25	12	-13	2	3	0	1	1	0	0	0	0	1	2.81	2	2	1	0	0	0	0	1	1.58	2	2	1	0	0	0	0	1	2.22	4		0	0	0	0	0			4
0	82	6	2	99999	99999		2004-10	10	6	-4	4	6	0	1	1	0	0	0	0	1	2.28	2	4	0	0	0	0	0	2				0	0	0	0	0					0	0	0	0	0
0	80	6	2	99999	99999		2004-09	20	15	-5	3	5	0	1	1	0	0	0	0	1	3.04	4		0	0	0	0	0			4		0	0	0	0	0			4		0	0	0	0	0			4
1	72	5	2	168	76	26.9274	2004-08	9	6	-3	4	5	0	1	1	0	0	0	0	1	1.97	2	2	1	0	0	0	0	1	2.81	2	2	1	0	0	0	0	1	1.58	2	2	1	0	0	0	0	2		2
0	72	5	2	99999	99999		2004-07	19	99		3	5	0	1	1	0	0	0	0	1	2.6	2	2	1	0	0	0	0	1	1.74	4		0	0	0	0	0			2	2	1	0	0	0	0	1	1.24	2
0	75	6	2	148	59	26.9357	2004-08	2	2	0	4	6	0	1	1	0	0	0	0	1	2.32	2	2	1	0	0	0	0	1	1.62	2	2	1	0	0	0	0	1	2.96	2	2	1	0	0	0	0	1	1.82	2
0	82	6	2	99999	99999		2004-07	4	0	-4	5	7	0	1	1	0	0	0	0	1	2.36	2	4	0	0	0	0	0	1	3.45	2	4	0	0	0	0	0	2		2	4	0	0	0	0	0	1	1.03	4
0	66	4	2	153	41	17.5146	2004-08	0	0	0	3	5	0	1	1	0	0	0	0	1	1.99	2	2	1	0	0	0	0	1	3.76	2	2	1	0	0	0	0	1	1.15	2	2	1	0	0	0	0	1	1.38	2
0	66	4	2	160	99999		2004-07	99	99		3	5	0	1	1	0	0	0	0	1	2.1	2	2	1	0	0	0	0	1	1.85	2	2	1	0	0	0	0	1	1.75	2	2	1	0	0	0	0	1	1.03	4
0	68	4	2	158	68	27.2392	2004-07	14	99		3	5	0	1	1	0	0	0	0	1	1.58	2	2	1	0	0	0	0	1	1.86	4		0	0	0	0	0			2	2	1	0	0	0	0	1	2.42	2
1	81	6	2	167	67	24.0238	2008-10	5	1	-4	4	5	0	1	1	0	0	0	0	1	1.72	2	2	1	0	0	0	0	1	1.43	2	2	1	0	0	0	0	1	1.55	2	2	1	0	0	0	0	1	2.21	2
1	70	5	2	99999	99999		2004-06	5	99		4	6	0	1	1	0	0	0	0	1	2.42	2	3	1	1	0	0	0	1	1.21	2	2	1	1	0	0	1	2		2	2	1	1	0	0	1	2		2
1	62	3	1	162	61	23.2434	2008-10	4	1	-3	3	3	0	1	1	0	0	0	0	1	2.27	2	2	1	0	0	0	0	2		4		0	0	0	0	0			4		0	0	0	0	0			4
1	60	3	1	170	67	23.1834	2008-09	1	0	-1	3	3	0	1	1	0	0	0	0	1	2.49	2	3	1	1	0	0	0	1	3.12	2	2	1	1	0	0	1	1	3.98	2	2	1	1	0	0	1	1	1.28	2
1	77	6	2	168	58	20.5499	2008-09	1	0	-1	4	5	0	1	1	0	0	0	0	1	2.32	2	2	1	0	0	0	0	1	1.08	2	2	1	0	0	0	0	1	1.12	2	2	1	0	0	0	0	1	1.25	2
0	76	6	2	158	56	22.4323	2008-08	2	1	-1	4	6	0	1	0	1	1	0	0	2		2	2	0	1	1	0	0	2		2	3	1	0	0	0	0	2		2	2	1	0	0	0	0	1	1.52	2
1	80	6	2	168	58	20.5499	2008-12	3	2	-1	4	5	0	1	1	0	0	0	0	1	2.13	2	2	1	0	0	0	0	2		2	2	1	0	0	0	0	1	1.62	4		0	0	0	0	0			4
0	52	1	1	150	48	21.3333	2008-08	2	0	-2	2	3	0	1	1	0	0	0	0	1	1.62	2	2	1	0	0	0	0	1	1.33	2	2	1	0	0	0	0	1	1.97	2	2	1	0	0	0	0	1	1.82	2
1	88	6	2	170	70	24.2215	2008-09	0	0	0	4	6	0	1	0	1	1	0	0	2		2	2	0	1	1	0	0	2		4		0	0	0	0	0			2	3	0	1	0	0	1	2		4
1	73	5	2	165	65	23.8751	2008-08	14	99		4	5	0	1	1	0	0	0	0	1	1.38	2	2	1	0	0	0	0	1	1.97	2	2	1	0	0	0	0	1	1.24	2	2	1	0	0	0	0	1	1.81	2
1	78	6	2	168	55	19.487	2008-07	4	99		4	5	0	1	1	0	0	0	0	1	1.47	2	3	1	1	1	0	0	1	3.14	3	4	0	0	0	0	0	2		2	4	0	0	0	0	0	2		2
1	79	6	2	175	65	21.2245	2008-07	8	1	-7	4	6	0	2	0	0	0	0	0	2		2	3	0	1	0	1	0	2		4		0	0	0	0	0			2	2	0	1	0	1	0	2		2
1	83	6	2	174	65	21.4691	2008-07	2	1	-1	4	5	0	1	1	0	0	0	0	1	2.45	2	2	1	0	0	0	0	1	1.54	2	2	1	0	0	0	0	1	1.81	2	2	1	0	0	0	0	1	1.46	2
0	82	6	2	167	45	16.1354	2008-07	16	4	-12	3	5	0	1	1	0	0	0	0	1	2.53	2	2	1	0	0	0	0	1	1.91	2	2	1	0	0	0	0	2		2	2	1	0	0	0	0	1	1.05	2
1	62	3	1	161	65	25.0762	2008-07	0	0	0	3	3	0	1	1	0	0	0	0	1	1.5	2	2	1	0	0	0	0	1	2.13	2	2	1	0	0	0	0	1	2.21	2	2	1	0	0	0	0	1	2.18	2
0	76	6	2	156	54	22.1893	2008-06	17	12	-5	4	6	0	1	1	0	0	0	0	1	3.05	2	2	1	0	0	0	0	1	2.33	2	2	1	0	0	0	0	2		2	2	1	0	0	0	0	1	1.63	2
1	79	6	2	160	43	16.7969	2008-05	10	5	-5	5	6	0	1	0	1	0	1	1	2		2	3	1	1	0	1	0	1	1.09	2	2	1	1	0	1	0	1	2.95	2	2	1	1	0	1	0	1	1.16	2
1	79	6	2	158	60	24.0346	2008-12	12	0	-12	5	6	0	1	1	0	0	0	0	1	1.66	3	2	1	0	0	0	0	1	1.75	2	2	1	0	0	0	0	1	1.42	2	2	1	0	0	0	0	1	2.31	2
1	75	6	2	163	73	27.4756	2008-05	19	12	-7	4	5	0	1	0	1	1	0	0	1	1.02	2	2	0	1	1	0	0	2		4		0	0	0	0	0			4		0	0	0	0	0			4
0	81	6	2	153	53	22.6409	2008-04	99	99		5	7	0	1	1	0	0	0	0	1	2	3	4	0	0	0	0	0	1	2.12	2	3	0	1	0	0	1	2		2	2	0	1	0	0	1	2		2
0	69	4	2	160	59	23.0469	2008-05	18	15	-3	3	5	0	1	1	0	0	0	0	1	2.28	2	2	1	0	0	0	0	1	2	4		0	0	0	0	0			2	2	1	0	0	0	0	2		2
0	72	5	2	162	75	28.578	2008-05	5	2	-3	4	6	0	1	1	0	0	0	0	1	1.17	2	4	0	0	0	0	0	2		2	4	0	0	0	0	0	2		4		0	0	0	0	0			4
0	87	6	2	150	56	24.8889	2008-04	6	0	-6	3	5	0	1	1	0	0	0	0	1	1.57	2	2	1	0	0	0	0	2		4		0	0	0	0	0			4		0	0	0	0	0			4
0	78	6	2	150	46	20.4444	2008-04	13	3	-10	5	7	0	1	1	0	0	0	0	1	1.95	2	2	1	0	0	0	0	2		2	2	1	0	0	0	0	1	2.72	4		0	0	0	0	0			2
1	65	4	2	167	62	22.231	2008-03	2	1	-1	3	4	0	1	1	0	0	0	0	1	1.95	2	4	0	0	0	0	0	2		2	4	0	0	0	0	0	2		2	3	0	1	1	0	0	2		2
1	78	6	2	164	62	23.0518	2008-02	99	99		5	6	0	1	1	0	0	0	0	1	1.36	2	2	1	0	0	0	0	1	2.01	2	2	1	0	0	0	0	1	1.84	2	2	1	0	0	0	0	2		2
0	78	6	2	164	62	23.0518	2008-02	99	99		3	5	0	1	1	0	0	0	0	1	2.19	2	2	1	0	0	0	0	1	1.51	2	2	1	0	0	0	0	1	2.87	4		0	0	0	0	0			4
0	83	6	2	155	40	16.6493	2008-02	16	99		5	7	0	1	0	1	1	0	0	2		4		0	0	0	0	0			4		0	0	0	0	0			4		0	0	0	0	0			4
1	66	4	2	169	80	28.0102	2008-11	6	5	-1	2	3	0	1	1	0	0	0	0	1	1.65	2	2	1	0	0	0	0	1	1.52	4		0	0	0	0	0			4		0	0	0	0	0			4
0	93	6	2	145	42	19.9762	2008-02	14	99		4	6	0	1	0	1	1	0	1	2		2	2	0	1	1	0	0	2		2	4	0	0	0	0	0	2				0	0	0	0	0
1	81	6	2	165	72	26.4463	2008-01	18	99		4	5	0	1	1	0	0	0	0	1	1.95	2	2	1	0	0	0	0	1	4.82	2	2	1	0	0	0	0	1	2.26	2	3	1	1	1	1	0	1	2.32	2
1	90	6	2	174	68	22.46	2008-01	7	99		4	5	0	1	0	1	1	1	0	2		2	2	0	1	1	1	0	2		2	2	0	1	1	1	0	2		2	2	0	1	1	1	0	2		2
0	72	5	2	99999	99999		2008-02	4	2	-2	3	5	0	1	1	0	0	0	0	1	2.29	2	2	1	0	0	0	0	1	2.22	2	2	1	0	0	0	0	1	1.74	2	2	1	0	0	0	0	1	2.6	2
1	86	6	2	173	62	20.7157	2008-01	99	99		3	4	0	1	1	0	0	0	0	1	1.64	2	2	1	0	0	0	0	1	1.99	4		0	0	0	0	0			2	2	1	0	0	0	0	1	1.6	2
1	65	4	2	169	70	24.5089	2007-12	2	0	-2	2	3	0	1	1	0	0	0	0	1	1.8	4		0	0	0	0	0			4		0	0	0	0	0			4		0	0	0	0	0			4
0	78	6	2	153	60	25.6312	2007-11	24	99		5	7	0	1	1	1	0	0	1	1	2.14	2	2	1	1	0	0	0	1	1.99	2	2	1	1	0	0	1	1	1.55	2	2	1	1	0	0	1	1	2.45	2
1	65	4	2	173	73	24.3911	2007-12	0	0	0	3	4	0	1	1	0	0	0	0	1	1.22	2	2	1	0	0	0	0	1	2.71	2	2	1	0	0	0	0	1	1.86	4		0	0	0	0	0			2
0	83	6	2	158	68	27.2392	2007-09	13	8	-5	4	6	0	1	1	1	0	0	1	1	1.21	4		0	0	0	0	0			4		0	0	0	0	0			4		0	0	0	0	0			4
0	78	6	2	155	42	17.4818	2007-10	11	99		3	5	0	1	1	0	0	0	0	1	2.06	2	2	1	0	0	0	0	1	1.54	2	2	1	0	0	0	0	2		2	2	1	0	0	0	0	2		2
1	73	5	2	168	71	25.1559	2008-12	1	0	-1	3	4	0	1	1	0	0	0	0	1	1.63	2	2	1	0	0	0	0	1	3.68	2	2	1	0	0	0	0	1	1.59	2	2	1	0	0	0	0	1	1.76	2
0	69	4	2	156	55	22.6003	2007-10	4	0	-4	3	5	0	1	1	0	0	0	0	1	1.38	2	2	1	0	0	0	0	1	1.88	2	2	1	0	0	0	0	1	2.03	2	2	1	0	0	0	0	1	2.41	2
1	64	3	1	167	67	24.0238	2007-09	18	13	-5	4	4	0	1	1	0	0	0	0	1	1.57	2	2	1	0	0	0	0	1	2.91	2	2	1	0	0	0	0	2		2	2	1	0	0	0	0	2		4
0	58	2	1	161	61	23.533	2007-09	4	99		4	5	0	1	1	0	0	0	0	1	2.39	2	3	1	1	1	0	0	1	3.18	2	2	1	1	1	0	0	2		2	2	1	1	1	0	0	1	1.32	2
0	79	6	2	154	50	21.0828	2007-09	2	0	-2	3	5	0	1	1	0	0	0	0	1	1.79	2	2	1	0	0	0	0	1	1.77	2	2	1	0	0	0	0	1	1.48	2	2	1	0	0	0	0	1	1.87	2
1	64	3	1	99999	83		2007-09	4	99		2	2	0	1	1	0	0	0	0	1	1.45	4		0	0	0	0	0			4		0	0	0	0	0			4		0	0	0	0	0			4
1	74	5	2	174	77	25.4327	2007-09	4	2	-2	4	5	0	1	1	0	0	0	0	1	1.13	2	2	1	0	0	0	0	1	1.88	2	2	1	0	0	0	0	1	1.51	2	2	1	0	0	0	0	1	1.94	2
1	69	4	2	163	70	26.3465	2007-08	0	0	0	3	4	0	1	1	1	1	0	0	1	1.59	2	2	1	1	1	0	0	1	1.54	2	2	1	1	1	0	0	1	1.33	2	2	1	1	1	0	0	1	1.55	2
0	73	5	2	150	50	22.2222	2007-08	7	6	-1	2	4	0	1	1	0	0	0	0	1	2.19	2	2	1	0	0	0	0	1	3.44	2	2	1	0	0	0	0	1	2.59	2	2	1	0	0	0	0	1	2.19	2
0	73	5	2	155	48	19.9792	2007-07	0	0	0	3	5	0	1	1	0	0	0	0	1	1.87	4		0	0	0	0	0			2	2	1	0	0	0	0	1	1.12	4		0	0	0	0	0			2
1	74	5	2	170	42	14.5329	2007-06	99	99		2	4	0	1	1	0	0	0	0	1	2.64	4		0	0	0	0	0			4		0	0	0	0	0			2	3	0	1	1	1	0	1	1.19	4
1	75	6	2	158	62	24.8358	2008-10	23	3	-20	3	4	0	1	1	0	0	0	0	1	2.35	2	2	1	0	0	0	0	1	2.61	4		0	0	0	0	0			2	2	1	0	0	0	0	1	4.1	2
1	87	6	2	168	63	22.3214	2007-07	0	0	0	4	5	0	1	1	0	0	0	0	1	1.94	2	2	1	0	0	0	0	1	7.15	2	2	1	0	0	0	0	1	2.18	2	2	1	0	0	0	0	1	2.38	4
0	82	6	2	147	40	18.5108	2007-07	20	0	-20	3	5	0	1	1	0	0	0	0	1	3.15	2	2	1	0	0	0	0	1	1.38	2	2	1	0	0	0	0	1	1.33	2	2	1	0	0	0	0	1	1.29	4
0	78	6	2	150	53	23.5556	2007-06	16	8	-8	4	6	0	1	1	0	0	0	0	1	1.76	4		0	0	0	0	0			4		0	0	0	0	0			4		0	0	0	0	0			4
1	75	6	2	99999	99999		2007-06	5	2	-3	4	5	0	1	1	0	0	0	0	1	2.28	2	2	1	0	0	0	0	1	1.61	2	2	1	0	0	0	0	1	2.16	4		0	0	0	0	0			2
0	69	4	2	99999	99999		2007-06	99	99		3	6	0	1	1	0	0	0	0	1	2.02	2	2	1	0	0	0	0	2		2	2	1	0	0	0	0	2		4		0	0	0	0	0			4
1	69	4	2	99999	99999		2007-05	1	1	0	3	4	0	1	1	0	0	0	0	1	2.37	2	2	1	0	0	0	0	1	4.79	2	2	1	0	0	0	0	1	1.05	2	2	1	0	0	0	0	1	1.64	2
1	75	6	2	173	70	23.3887	2007-05	19	99		4	5	0	1	1	0	0	0	0	1	3.36	2	2	1	0	0	0	0	1	1.54	4		0	0	0	0	0			4		0	0	0	0	0			4
0	69	4	2	155	55	22.8928	2007-03	15	99		3	6	0	1	0	1	1	0	0	1	1.09	2	3	1	0	0	0	0	1	2.4	2	2	1	0	0	0	0	1	2.3	2	2	1	0	0	0	0	1	1.08	4
1	67	4	2	165	70	25.7117	2007-05	19	99		2	3	0	1	1	0	0	0	0	1	1.32	4		0	0	0	0	0			2	2	1	0	0	0	0	2		4		0	0	0	0	0			4
0	95	6	2	165	49	17.9982	2007-05	13	0	-13	4	6	0	1	1	0	0	0	0	1	2.4	2	2	1	0	0	0	0	1	3.04	4		0	0	0	0	0			2	2	1	0	0	0	0	1	1.85	2
1	69	4	2	163	60	22.5827	2008-09	0	99		3	4	0	1	1	0	0	0	0	1	2.22	4		0	0	0	0	0			4		0	0	0	0	0			4		0	0	0	0	0			4
0	79	6	2	158	62	24.8358	2007-04	2	0	-2	5	7	0	1	0	1	1	0	0	2		4		0	0	0	0	0			4		0	0	0	0	0			4		0	0	0	0	0			4
1	75	6	2	99999	70		2007-04	4	3	-1	5	6	0	1	1	0	0	0	0	1	3	2	2	1	0	0	0	0	1	3.31	2	2	1	0	0	0	0	1	2.55	2	2	1	0	0	0	0	1	3.41	2
1	85	6	2	153	50	21.3593	2007-04	21	99		4	5	0	1	0	1	1	0	0	2		4		0	0	0	0	0			4		0	0	0	0	0			4		0	0	0	0	0			4
0	76	6	2	157	69	27.993	2007-03	2	99		5	7	0	1	0	1	1	0	0	2		4		0	0	0	0	0			4		0	0	0	0	0			4		0	0	0	0	0			4
0	71	5	2	99999	99999		2007-03	21	99		4	6	0	1	0	1	1	0	0	2		4		0	0	0	0	0			4		0	0	0	0	0			4		0	0	0	0	0			4
0	69	4	2	99999	99999		2007-03	1	1	0	3	5	0	1	1	0	0	0	0	1	2.6	2	2	1	0	0	0	0	1	2.34	2	2	1	0	0	0	0	1	3.32	2	2	1	0	0	0	0	1	2.21	2
0	84	6	2	99999	65		2007-02	3	1	-2	4	6	0	1	1	0	0	0	0	1	2.55	2	2	1	0	0	0	0	1	2.41	2	2	1	0	0	0	0	1	2.32	2	2	1	0	0	0	0	1	1.7	2
0	76	6	2	158	65	26.0375	2007-01	12	99		4	6	0	1	1	0	0	0	0	1	2.84	2	2	1	0	0	0	0	1	2.76	4		0	0	0	0	0			4		0	0	0	0	0			4
1	60	3	1	168	66	23.3844	2007-01	99	99		4	4	0	1	1	0	0	0	0	1	2.33	2	2	1	0	0	0	0	1	1.13	2	2	1	0	0	0	0	1	0.99	4		0	0	0	0	0			4
1	81	6	2	170	70	24.2215	2007-01	0	0	0	4	5	0	1	1	0	0	0	0	1	2.55	2	2	1	0	0	0	0	1	2.75	2	2	1	0	0	0	0	1	1.5	2	2	1	0	0	0	0	1	2.29	2
1	79	6	2	160	60	23.4375	2008-11	21	6	-15	4	5	0	1	1	1	1	1	0	1	2.87	2	3	1	1	0	0	0	1	1.69	2	2	1	1	0	0	1	1	1.14	2	2	1	1	0	0	1	1	1.15	2
1	82	6	2	99999	99999		2006-11	8	99		4	5	0	1	0	1	1	1	0	2		4		0	0	0	0	0			4		0	0	0	0	0			4		0	0	0	0	0			4
0	87	6	2	153	55	23.4952	2006-11	15	99		3	5	0	1	0	1	1	0	0	2		4		0	0	0	0	0			4		0	0	0	0	0			4		0	0	0	0	0			4
1	78	6	2	160	65	25.3906	2006-11	2	0	-2	4	5	0	1	1	0	0	0	0	1	1.77	2	2	1	0	0	0	0	2		2	2	1	0	0	0	0	1	1.14	2	3	0	1	1	0	0	1	1	2
1	72	5	2	99999	99999		2006-09	4	2	-2	3	4	0	1	1	0	0	0	0	1	2.42	2	2	1	0	0	0	0	1	1.15	2	2	1	0	0	0	0	1	1.73	2	2	1	0	0	0	0	1	1.81	2
0	65	4	2	160	71	27.7344	2006-09	26	23	-3	2	4	0	1	1	0	0	0	0	1	2.83	4		0	0	0	0	0			4		0	0	0	0	0			4		0	0	0	0	0			4
1	69	4	2	170	64	22.1453	2006-08	9	99		3	4	0	1	1	0	0	0	0	1	2.52	2	2	1	0	0	0	0	2		2	2	1	0	0	0	0	1	2.36	2	2	1	0	0	0	0	1	2.17	2
1	69	4	2	157	60	24.3418	2006-09	2	0	-2	3	5	0	1	1	0	0	0	0	1	1.7	2	2	1	0	0	0	0	1	2.66	2	2	1	0	0	0	0	1	2.85	2	2	1	0	0	0	0	1	2.77	4
0	78	6	2	99999	99999		2006-09	6	99		4	6	0	1	1	0	0	0	0	1	2.41	2	2	1	0	0	0	0	1	2.31	2	2	1	0	0	0	0	1	1.04	2	2	1	0	0	0	0	2		2
0	94	6	2	99999	99999		2006-08	99	99		4	6	0	1	0	1	1	0	0	2		4		0	0	0	0	0			4		0	0	0	0	0			4		0	0	0	0	0			4
0	76	6	2	149	64	28.8275	2006-07	11	1	-10	5	7	0	1	1	0	0	0	0	1	2.64	4		0	0	0	0	0			4		0	0	0	0	0			4		0	0	0	0	0			4
0	72	5	2	155	58	24.1415	2008-11	24	18	-6	4	6	0	1	1	0	0	0	0	1	1.07	4		0	0	0	0	0			4		0	0	0	0	0			2	4	0	0	0	0	0	1	1.17	4
1	78	6	2	99999	68		2006-06	14	99		4	5	0	1	1	0	0	0	0	1	1.82	4		0	0	0	0	0			4		0	0	0	0	0			4		0	0	0	0	0			4
1	71	5	2	155	63	26.2227	2006-07	15	0	-15	3	4	0	1	1	0	0	0	0	1	2.97	2	2	1	0	0	0	0	1	1.07	2	2	1	0	0	0	0	1	2.81	2	2	1	0	0	0	0	1	1.86	2
1	76	6	2	169	71	24.8591	2006-06	3	99		5	6	0	1	1	0	0	0	0	1	2.49	2	2	1	0	0	0	0	1	2.88	2	2	1	0	0	0	0	1	2.23	2	2	1	0	0	0	0	1	1.86	2
0	70	5	2	158	60	24.0346	2006-05	19	15	-4	4	6	0	1	1	0	0	0	0	1	2.44	2	2	1	0	0	0	0	1	2.39	2	3	1	1	1	1	0	1	2.14	2	2	1	1	1	1	0	1	1.27	2
1	73	5	2	163	99999		2006-03	2	99		3	4	0	1	0	1	1	0	0	1	1.09	2	2	0	1	1	0	0	2		2	2	0	1	1	0	0	2		2	2	0	1	1	0	0	2		4
0	85	6	2	99999	99999		2006-05	99	99		4	6	0	1	1	0	0	0	0	1	1.79	4		0	0	0	0	0			4		0	0	0	0	0			4		0	0	0	0	0			4
0	90	6	2	156	45	18.4911	2006-03	25	26	1	4	6	0	1	0	1	1	0	0	1	1.36	4		0	0	0	0	0			4		0	0	0	0	0			4		0	0	0	0	0			4
0	84	6	2	155	65	27.0552	2006-01	18	99		3	5	0	1	1	0	0	0	0	1	3.6	4		0	0	0	0	0			4		0	0	0	0	0			4		0	0	0	0	0			4
0	70	5	2	150	43	19.1111	2006-04	6	4	-2	3	5	0	1	1	0	0	0	0	1	1.84	4		0	0	0	0	0			4		0	0	0	0	0			4		0	0	0	0	0			4
1	70	5	2	175	60	19.5918	2006-04	6	99		3	4	0	1	1	0	0	0	0	1	1.93	2	2	1	0	0	0	0	1	1.32	2	2	1	0	0	0	0	1	1.84	2	2	1	0	0	0	0	1	2.23	2
1	77	6	2	174	60	19.8177	2008-12	10	1	-9	5	7	0	1	1	0	0	0	0	1	1.54	2	2	1	0	0	0	0	1	2.32	2	2	1	0	0	0	0	1	1.4	2	2	1	0	0	0	0	1	1.61	2
0	57	2	1	160	68	26.5625	2008-10	0	0	0	2	3	0	1	1	0	0	0	0	1	2.21	2	2	1	0	0	0	0	1	2.38	4		0	0	0	0	0			2	2	1	0	0	0	0	1	2	2
1	64	3	1	168	72	25.5102	2007-02	4	1	-3	4	4	0	1	1	0	0	0	0	1	2.1	2	2	1	0	0	0	0	1	1.57	2	2	1	0	0	0	0	1	2.14	2	3	1	1	1	0	0	1	1.15	4
0	78	6	2	150	37	16.4444	2007-02	2	1	-1	5	7	0	1	1	0	0	0	0	1	2.12	4		0	0	0	0	0			2	2	1	0	0	0	0	1	1.94	2	3	1	1	0	0	1	1	2.16	2
1	58	2	1	172	80	27.0416	2007-02	6	4	-2	3	3	0	1	1	0	0	0	0	1	2.64	2	2	1	0	0	0	0	1	1.79	4		0	0	0	0	0			2	2	1	0	0	0	0	1	2.7	2
1	63	3	1	166	58	21.048	2007-02	20	19	-1	3	3	0	2	0	0	0	0	0	1	3.17	2	3	1	0	0	0	0	1	1.8	2	2	1	0	0	0	0	1	2.38	2	2	1	0	0	0	0	1	2	2
1	62	3	1	171	70	23.939	2007-02	0	0	0	3	3	0	1	1	0	0	0	0	1	3.39	2	3	1	1	0	0	0	1	2.28	2	3	1	0	0	0	0	1	1.92	2	2	1	0	0	0	0	1	2.2	2
1	63	3	1	168	67	23.7387	2007-02	3	3	0	4	5	0	1	1	1	0	0	1	1	2.65	2	2	1	1	0	0	0	1	2.68	2	2	1	1	0	0	1	1	2.39	4		0	0	0	0	0			2
1	74	5	2	171	61.5	21.0321	2007-02	0	0	0	3	4	0	1	1	1	0	0	1	1	2.36	2	2	1	1	0	0	0	1	3.28	2	2	1	1	0	0	1	1	2.19	2	2	1	1	0	0	1	1	1.55	2
1	43	1	1	162	70	26.6728	2007-02	13	2	-11	3	3	0	1	1	1	0	0	1	1	2.44	2	2	1	1	0	0	0	1	1.49	2	2	1	1	0	0	1	1	2.18	2	2	1	1	0	0	1	1	2.11	2
1	66	4	2	165	67	24.6097	2007-02	0	0	0	4	5	0	1	1	1	0	0	1	1	2.83	2	3	1	1	0	1	0	1	1.38	2	2	1	1	0	1	1	1	1.15	2	2	1	1	0	1	1	1	1.73	2
1	68	4	2	168	70	24.8016	2007-01	0	0	0	2	3	0	1	1	1	1	1	0	1	2.2	2	3	1	0	0	0	0	1	2.28	2	2	1	0	0	0	0	1	1.96	2	2	1	0	0	0	0	1	1.97	2
1	84	6	2	150	45	20	2008-10	9	5	-4	3	5	0	1	1	0	0	0	0	1	2.2	2	2	1	0	0	0	0	1	4.83	2	3	1	1	1	1	0	1	3.27	2	2	1	1	1	1	0	1	2.59	2
0	80	6	2	150	52	23.1111	2007-01	3	2	-1	4	6	0	1	1	0	0	0	0	1	2.96	2	2	1	0	0	0	0	1	1.44	4		0	0	0	0	0			4		0	0	0	0	0			4
1	67	4	2	172	71	23.9995	2007-01	2	0	-2	3	4	0	1	1	0	0	0	0	1	2.14	2	2	1	0	0	0	0	1	2.15	4		0	0	0	0	0			2	2	1	0	0	0	0	1	2.13	4
0	64	3	1	172	71	23.9995	2006-12	15	15	0	4	5	0	1	1	0	0	0	0	1	1.28	2	2	1	0	0	0	0	1	2.15	4		0	0	0	0	0			2	2	1	0	0	0	0	1	2.13	2
1	56	2	1	173	93	31.0735	2006-12	1	0	-1	3	3	0	1	1	0	0	0	0	1	2.3	4		0	0	0	0	0			2	2	1	0	0	0	0	1	5.47	2	2	1	0	0	0	0	1	2.74	2
0	57	2	1	154	57	24.0344	2006-12	2	2	0	3	4	0	1	1	1	1	0	0	1	2.71	2	3	1	1	0	1	0	1	1.48	4		0	0	0	0	0			4		0	0	0	0	0			4
1	60	3	1	170	75	25.9516	2006-12	0	0	0	3	3	0	1	1	1	1	0	0	1	1.83	2	2	1	1	1	0	0	1	3.17	2	2	1	1	1	0	0	1	1.73	2	3	1	0	0	0	0	1	1.72	2
0	79	6	2	158	53	21.2306	2006-12	4	4	0	5	8	0	1	1	1	0	0	1	1	3.94	2	3	1	1	1	0	0	1	1.59	2	2	1	1	1	0	0	1	2.45	2	2	1	1	1	0	0	1	2.1	2
0	72	5	2	158	55	22.0317	2006-12	5	2	-3	4	6	0	1	1	1	1	0	0	1	2.03	2	4	0	0	0	0	0	2		4		0	0	0	0	0			2	3	0	1	1	0	0	1	1.54	3
1	68	4	2	99999	99999		2006-11	17	3	-14	3	4	0	1	1	0	0	0	0	1	2.06	2	2	1	0	0	0	0	1	1.79	4		0	0	0	0	0			2	2	1	0	0	0	0	1	1.19	2
1	81	6	2	171	62	21.2031	2006-11	3	1	-2	5	7	0	1	1	1	0	1	0	1	3.02	2	3	1	0	0	0	0	1	1.25	2	2	1	0	0	0	0	1	1.6	2	2	1	0	0	0	0	1	2.08	4
1	67	4	2	167	65	23.3067	2008-09	1	0	-1	4	5	0	1	1	0	0	0	0	1	1.46	4		0	0	0	0	0			2	2	1	0	0	0	0	1	1.43	2	2	1	0	0	0	0	1	1.68	2
1	66	4	2	158	64	25.6369	2006-11	7	4	-3	2	3	0	1	1	0	0	0	0	1	2.87	2	2	1	0	0	0	0	1	2.26	2	2	1	0	0	0	0	1	2.27	2	2	1	0	0	0	0	1	2.27	2
1	68	4	2	99999	99999		2006-10	15	14	-1	2	3	0	1	1	0	0	0	0	1	2.45	2	2	1	0	0	0	0	1	2.15	2	2	1	0	0	0	0	1	2.05	2	2	1	0	0	0	0	1	2.5	2
1	70	5	2	163	64	24.0882	2006-11	2	0	-2	4	5	0	1	1	0	0	0	0	1	2.51	4		0	0	0	0	0			2	2	1	0	0	0	0	1	1.29	2	2	1	0	0	0	0	2		2
1	77	6	2	170	64	22.1453	2006-10	3	1	-2	4	6	0	2	0	0	0	0	0	1	5.64	2	3	1	0	0	0	0	1	1.81	2	2	1	0	0	0	0	1	1.65	2	3	1	1	1	0	0	1	0.95	4
1	71	5	2	99999	99999		2006-10	5	2	-3	3	5	0	1	1	1	0	1	0	1	3.61	2	2	1	1	0	1	0	1	2.23	2	2	1	1	0	1	0	1	1.96	2	2	1	1	0	1	0	1	1.4	4
1	59	2	1	169	60	21.0077	2006-10	0	0	0	2	2	0	1	1	0	0	0	0	1	2.27	2	2	1	0	0	0	0	2		2	2	1	0	0	0	0	1	3.04	2	2	1	0	0	0	0	1	2.51	2
0	68	4	2	158	45	18.026	2006-10	1	1	0	3	5	0	1	1	1	1	0	0	1	3.72	2	2	1	1	1	0	0	1	2.1	4		0	0	0	0	0			2	2	1	1	1	0	0	1	1.21	2
1	71	5	2	170	65	22.4913	2006-09	7	2	-5	4	5	0	1	1	0	0	0	0	1	2.61	2	3	0	1	1	0	0	2		2	3	1	0	0	0	0	1	1.69	2	2	1	0	0	0	0	1	2.05	2
1	70	5	2	160	57	22.2656	2006-09	0	0	0	3	5	0	1	1	0	0	0	0	1	2.36	2	3	1	1	1	0	0	1	2.47	2	2	1	1	1	0	0	1	1.31	2	2	1	1	1	0	0	1	2.27	4
1	63	3	1	167	58	20.7967	2006-08	2	0	-2	4	4	0	1	1	0	0	0	0	1	1.83	2	3	1	1	1	0	0	1	1.41	4		0	0	0	0	0			2	2	1	1	1	0	0	1	1.81	2
1	67	4	2	168	63	22.3214	2008-09	4	1	-3	3	4	0	1	0	1	1	1	0	1	2.13	2	2	0	1	1	1	0	2		2	2	0	1	1	1	0	2		2	2	0	1	1	1	0	2		2
1	71	5	2	172	60	20.2812	2006-08	19	19	0	3	4	0	1	1	1	1	0	0	1	2.51	4		0	0	0	0	0			2	2	1	1	1	0	0	2		2	2	1	1	1	0	0	1	2.64	4
1	64	3	1	99999	99999		2006-07	17	4	-13	4	4	0	1	1	0	0	0	0	1	2.29	4		0	0	0	0	0			2	2	1	0	0	0	0	1	2.57	2	2	1	0	0	0	0	1	1.37	3
1	34	1	1	172	59	19.9432	2006-08	1	0	-1	2	2	0	1	1	0	0	0	0	1	2.22	2	2	1	0	0	0	0	1	2.69	2	2	1	0	0	0	0	1	2.69	2	2	1	0	0	0	0	1	2.12	2
0	65	4	2	155	50	20.8117	2006-07	21	20	-1	3	5	0	1	1	0	0	0	0	1	1.55	2	2	1	0	0	0	0	1	2.53	4		0	0	0	0	0			2	2	1	0	0	0	0	1	1.27	4
1	48	1	1	175	79	25.7959	2006-07	7	3	-4	3	3	0	1	1	1	0	1	0	1	1.98	2	2	1	1	0	1	0	1	2.6	2	2	1	1	0	1	0	1	2.14	2	2	1	1	0	1	0	1	2.37	2
1	63	3	1	166	68	24.677	2006-07	8	8	0	5	5	0	1	1	0	0	0	0	1	2.61	2	2	1	0	0	0	0	1	2.08	4		0	0	0	0	0			4		0	0	0	0	0			4
0	58	2	1	158	67	26.8386	2006-06	3	3	0	3	4	0	1	0	1	1	1	0	1	0.88	2	2	0	1	1	1	0	1	0.97	4		0	0	0	0	0			2	2	0	1	1	1	0	2		2
1	70	5	2	177	68	21.7051	2006-06	5	4	-1	3	4	0	1	1	0	0	0	0	1	2.03	4		0	0	0	0	0			2	2	1	0	0	0	0	1	1.46	2	2	1	0	0	0	0	1	2.63	2
0	51	1	1	158	48	19.2277	2006-05	2	0	-2	3	4	0	1	1	0	0	0	0	1	2.01	2	2	1	0	0	0	0	1	1.33	4		0	0	0	0	0			4		0	0	0	0	0			4
1	88	6	2	99999	99999		2006-04	3	3	0	4	6	0	1	0	1	0	1	1	2		4		0	0	0	0	0			4		0	0	0	0	0			4		0	0	0	0	0			4
0	67	4	2	159	65	25.711	2008-09	7	1	-6	3	5	0	1	1	0	0	0	0	1	1.94	2	2	1	0	0	0	0	1	2.99	4		0	0	0	0	0			2	2	1	0	0	0	0	1	2.2	2
0	67	4	2	161	63	24.3046	2006-05	22	2	-20	3	6	0	1	0	1	1	0	0	1	2	2	3	1	0	0	0	0	1	2.24	2	2	1	0	0	0	0	1	1.16	2	2	1	0	0	0	0	1	1.94	4
0	71	5	2	160	70	27.3438	2006-05	4	0	-4	3	5	0	1	1	0	0	0	0	1	1.86	2	2	1	0	0	0	0	1	1.29	4		0	0	0	0	0			4		0	0	0	0	0			4
0	69	4	2	160	52	20.3125	2006-05	11	11	0	2	4	0	1	0	1	1	0	0	1	1.36	2	3	1	0	0	0	0	1	2.92	2	2	1	0	0	0	0	1	2.4	2	2	1	0	0	0	0	1	2.29	2
1	60	3	1	173	85	28.4005	2006-05	14	16	2	3	3	0	2	0	0	0	0	0	1	0.9	2	3	1	0	0	0	0	1	1.02	2	2	1	0	0	0	0	1	1.91	4		0	0	0	0	0			4
1	70	5	2	172	72	24.3375	2006-04	20	17	-3	3	4	0	1	1	0	0	0	0	1	3.56	4		0	0	0	0	0			4		0	0	0	0	0			4		0	0	0	0	0			4
0	64	3	1	99999	70		2006-04	0	6	6	4	5	0	1	1	0	0	0	0	1	1.84	2	4	0	0	0	0	0	1	1.79	2	3	1	0	0	0	0	1	2.55	2	2	1	0	0	0	0	1	2.76	2
1	69	4	2	169	64	22.4082	2006-03	4	4	0	3	4	0	1	1	0	0	0	0	1	2.36	2	2	1	0	0	0	0	1	2.28	4		0	0	0	0	0			2	2	1	0	0	0	0	1	1.59	2
1	71	5	2	167	65	23.3067	2006-03	2	1	-1	3	4	0	1	1	0	0	0	0	1	2.27	2	2	1	0	0	0	0	1	1.66	2	2	1	0	0	0	0	1	1.96	4		0	0	0	0	0			2
0	67	4	2	158	64	25.6369	2006-03	1	0	-1	5	7	0	1	1	1	1	0	0	1	1.81	2	3	1	0	0	0	0	1	2.02	4		0	0	0	0	0			2	3	1	1	1	0	0	1	2.16	4
1	66	4	2	160	65	25.3906	2006-02	2	1	-1	3	4	0	1	1	1	0	1	0	1	2.15	2	3	0	1	0	1	0	1	0.9	2	2	0	1	0	1	1	2		2	2	0	1	0	1	1	1	0.89	2
1	72	5	2	163	66	24.841	2008-08	3	0	-3	3	5	0	1	1	1	0	0	1	1	3.38	4		0	0	0	0	0			4		0	0	0	0	0			2	3	1	1	1	1	0	1	1.67	2
1	50	1	1	176	78	25.1808	2006-02	17	1	-16	5	5	0	1	1	1	1	1	0	1	2.03	4		0	0	0	0	0			2	3	1	0	0	0	0	2		2	2	1	0	0	0	0	1	1.64	2
1	58	2	1	175	70	22.8571	2008-08	15	2	-13	3	3	0	1	1	0	0	0	0	1	3.01	2	2	1	0	0	0	0	1	5.06	2	2	1	0	0	0	0	1	1.48	2	2	1	0	0	0	0	1	3.67	2
0	65	4	2	155	55	22.8928	2008-08	0	0	0	3	5	0	1	1	0	0	0	0	1	2.38	2	2	1	0	0	0	0	1	2.34	4		0	0	0	0	0			2	2	1	0	0	0	0	1	2.48	2
1	61	3	1	167	70	25.0995	2008-07	0	0	0	3	3	0	1	1	0	0	0	0	1	0.99	2	2	1	0	0	0	0	1	2.09	4		0	0	0	0	0			2	2	1	0	0	0	0	1	1.33	4
1	65	4	2	165	72	26.4463	2008-07	1	1	0	3	4	0	1	1	0	0	0	0	1	2.48	2	3	1	1	1	1	0	1	3.41	4		0	0	0	0	0			4		0	0	0	0	0			2
0	76	6	2	151	39	17.1045	2008-12	3	2	-1	5	7	0	1	1	0	0	0	0	1	2.04	4		0	0	0	0	0			2	2	1	0	0	0	0	1	2.53	2	2	1	0	0	0	0	1	5.53	2
1	72	5	2	161	64	24.6904	2008-06	7	3	-4	3	4	0	1	0	1	0	0	1	1	1.78	2	3	1	1	0	0	0	2		2	2	1	1	0	0	1	1	2.16	4		0	0	0	0	0			2
1	68	4	2	160	55	21.4844	2008-07	2	2	0	3	4	0	1	1	1	0	0	1	1	3.36	2	3	1	0	0	0	0	1	3.24	4		0	0	0	0	0			2	2	1	0	0	0	0	1	3.35	2
1	58	2	1	162	60	22.8624	2008-06	1	0	-1	4	4	0	1	1	0	0	0	0	1	2.24	4		0	0	0	0	0			2	2	1	0	0	0	0	1	2.65	4		0	0	0	0	0			2
0	67	4	2	161	54	20.8325	2008-06	20	4	-16	3	5	0	1	1	1	0	0	1	1	2.46	2	3	1	0	0	0	0	1	1.99	2	2	1	0	0	0	0	1	2.15	2	2	1	0	0	0	0	1	1.99	2
1	60	3	1	162	80	30.4832	2008-06	0	0	0	3	3	0	1	1	1	0	0	1	1	1.9	2	2	1	1	0	0	0	1	2.47	2	2	1	1	0	0	1	1	2.45	2	2	1	1	0	0	1	1	1.63	2
1	84	6	2	150	45	20	2008-06	4	0	-4	3	5	0	1	1	1	0	0	1	1	2.32	2	3	1	1	1	1	0	1	1.79	4		0	0	0	0	0			2	2	1	1	1	1	0	1	1.13	2
0	88	6	2	148	48	21.9138	2008-06	24	36	12	5	7	0	2	0	0	0	0	0	1	1.15	4		0	0	0	0	0			4		0	0	0	0	0			4		0	0	0	0	0			4
1	69	4	2	160	68	26.5625	2008-05	12	0	-12	3	4	0	1	1	0	0	0	0	1	2.5	2	2	1	0	0	0	0	1	2.6	2	2	1	0	0	0	0	1	2.85	2	2	1	0	0	0	0	1	2.38	2
1	63	3	1	174	87	28.7356	2008-05	8	5	-3	4	5	0	1	1	1	0	0	1	1	4.25	4		0	0	0	0	0			4		0	0	0	0	0			4		0	0	0	0	0			4
0	76	6	2	160	49	19.1406	2008-05	17	13	-4	4	6	0	1	1	0	0	0	0	1	1.83	2	2	1	0	0	0	0	2		2	2	1	0	0	0	0	1	1.62	2	2	1	0	0	0	0	2		2
1	42	1	1	170	72	24.9135	2008-12	0	0	0	3	3	0	1	1	0	0	0	0	1	1.92	2	2	1	0	0	0	0	1	2.01	4		0	0	0	0	0			2	2	1	0	0	0	0	1	1.46	2
1	66	4	2	162	74	28.1969	2008-04	0	0	0	2	3	0	1	1	1	0	0	1	1	2.37	2	3	1	1	1	0	0	1	2.22	2	2	1	1	1	0	1	1	2.99	4		0	0	0	0	0			4
0	78	6	2	145	40	19.025	2008-04	5	0	-5	4	6	0	1	0	1	0	0	1	1	1.14	4		0	0	0	0	0			2	3	1	0	0	0	0	1	3.08	2	2	1	0	0	0	0	1	3.45	2
0	54	1	1	156	47	19.313	2008-04	13	0	-13	3	4	0	1	1	0	0	0	0	1	5.72	2	2	1	0	0	0	0	1	1.31	4		0	0	0	0	0			2	2	1	0	0	0	0	1	1.54	4
0	80	6	2	157	50	20.2848	2008-04	6	12	6	4	6	0	1	1	1	0	0	1	1	2.99	4		0	0	0	0	0			2	3	1	0	0	0	0	1	4.09	4		0	0	0	0	0			4
0	73	5	2	153	48	20.5049	2008-04	2	0	-2	4	6	0	1	1	1	0	0	1	1	2.15	4		0	0	0	0	0			2	3	1	0	0	0	0	1	3.69	4		0	0	0	0	0			4
0	68	4	2	160	51	19.9219	2008-04	2	0	-2	3	5	0	1	1	0	0	0	0	1	2.59	2	2	1	0	0	0	0	1	3.96	4		0	0	0	0	0			2	2	1	0	0	0	0	1	1.01	2
1	77	6	2	168	78	27.6361	2008-03	2	0	-2	4	5	0	1	1	1	0	0	1	1	2.76	4		0	0	0	0	0			2	3	1	1	1	0	0	1	1.09	2	2	1	1	1	0	0	1	1.5	4
1	78	6	2	178	68	21.4619	2008-03	1	0	-1	4	5	0	1	1	1	0	0	1	1	2.76	2	2	1	1	0	0	0	2		2	2	1	1	0	0	1	1	2.97	2	2	1	1	0	0	1	1	2.15	2
1	60	3	1	170	69	23.8754	2008-03	1	1	0	4	4	0	1	1	0	0	0	0	1	1.97	2	2	1	0	0	0	0	1	2.69	2	2	1	0	0	0	0	1	2.14	4		0	0	0	0	0			2
1	67	4	2	168	75	26.5731	2008-03	1	0	-1	3	4	0	1	1	1	0	0	1	1	2.58	2	2	1	1	0	0	0	1	1.83	2	2	1	1	0	0	1	1	2.02	4		0	0	0	0	0			2
0	75	6	2	156	50	20.5457	2008-12	10	6	-4	5	8	0	1	1	0	0	0	0	1	2.06	2	2	1	0	0	0	0	1	3.09	4		0	0	0	0	0			2	2	1	0	0	0	0	2		4
1	68	4	2	168	58	20.5499	2008-02	0	0	0	3	4	0	1	1	0	0	0	0	1	2.43	2	2	1	0	0	0	0	1	2.09	4		0	0	0	0	0			2	2	1	0	0	0	0	1	4.91	2
1	59	2	1	178	80	25.2493	2008-02	2	1	-1	4	4	0	1	1	1	0	1	0	1	2.17	2	3	1	1	1	1	0	1	1.59	2	2	1	1	1	1	0	1	1.02	4		0	0	0	0	0			4
1	64	3	1	174	68	22.46	2008-02	7	5	-2	2	2	0	1	1	0	0	0	0	1	1.98	2	2	1	0	0	0	0	1	2.21	4		0	0	0	0	0			4		0	0	0	0	0			4
0	76	6	2	154	55	23.1911	2008-01	0	0	0	4	6	0	1	1	0	0	0	0	1	3.24	4		0	0	0	0	0			4		0	0	0	0	0			4		0	0	0	0	0			4
1	66	4	2	160	53	20.7031	2008-01	1	0	-1	4	5	0	1	1	0	0	0	0	1	2.08	2	2	1	0	0	0	0	2		4		0	0	0	0	0			2	2	1	0	0	0	0	1	1.72	2
1	63	3	1	175	51	16.6531	2008-01	2	2	0	2	2	0	1	1	0	0	0	0	1	2.42	2	2	1	0	0	0	0	1	2.69	4		0	0	0	0	0			2	2	1	0	0	0	0	1	1.72	2
1	70	5	2	162	63	24.0055	2008-01	5	3	-2	3	4	0	1	1	0	0	0	0	1	2.39	2	2	1	0	0	0	0	1	3.18	4		0	0	0	0	0			2	2	1	0	0	0	0	1	2.96	2
1	62	3	1	171	76	25.9909	2008-01	1	0	-1	2	2	0	1	1	1	0	0	1	1	2.03	2	3	1	1	1	0	0	1	2.71	4		0	0	0	0	0			2	2	1	1	1	0	0	1	6.69	2
0	69	4	2	99999	58		2008-01	9	9	0	4	7	0	1	1	1	0	1	0	1	2.18	2	2	1	1	0	1	0	1	3.91	2	3	1	1	1	1	0	1	1.6	2	2	1	1	1	1	0	1	1.23	2
0	66	4	2	99999	99999		2007-12	20	17	-3	4	6	0	1	1	0	0	0	0	1	1.68	2	2	1	0	0	0	0	1	2.03	2	2	1	0	0	0	0	1	1.57	4		0	0	0	0	0			4
1	75	6	2	168	54	19.1327	2008-11	16	16	0	4	5	0	1	1	0	0	0	0	1	2.13	2	2	1	0	0	0	0	2		4		0	0	0	0	0			4		0	0	0	0	0			4
1	75	6	2	170	70	24.2215	2008-01	18	4	-14	4	5	0	1	1	0	0	0	0	1	2.57	2	2	1	0	0	0	0	1	2.13	4		0	0	0	0	0			2	2	1	0	0	0	0	1	1.6	2
1	70	5	2	170	67	23.1834	2007-12	2	0	-2	3	4	0	1	1	0	0	0	0	1	2.21	2	2	1	0	0	0	0	1	1.42	2	2	1	0	0	0	0	1	2.43	2	2	1	0	0	0	0	1	2.31	2
0	82	6	2	154	56	23.6128	2007-12	21	1	-20	4	6	0	1	1	0	0	0	0	1	2.93	2	2	1	0	0	0	0	1	1.32	2	2	1	0	0	0	0	1	3.41	2	2	1	0	0	0	0	1	2.79	2
0	77	6	2	160	60	23.4375	2007-11	26	21	-5	4	7	0	1	1	1	0	0	1	1	3.06	2	2	1	1	0	0	0	1	2.96	2	3	1	0	0	0	0	2		2	2	1	0	0	0	0	1	3.44	4
1	52	1	1	99999	99999		2007-12	1	0	-1	3	3	0	1	1	0	0	0	0	1	2.45	2	3	1	1	1	0	0	1	1.7	4		0	0	0	0	0			4		0	0	0	0	0			4
0	71	5	2	156	68	27.9421	2007-12	16	3	-13	4	6	0	1	1	0	0	0	0	1	2.56	4		0	0	0	0	0			4		0	0	0	0	0			2	2	1	0	0	0	0	1	1.83	2
0	75	6	2	150	55	24.4444	2007-12	14	3	-11	4	6	0	1	1	0	0	0	0	1	2.3	2	2	1	0	0	0	0	1	3.51	4		0	0	0	0	0			2	2	1	0	0	0	0	1	1.59	4
0	55	2	1	162	55	20.9572	2007-11	15	3	-12	3	4	0	1	1	1	0	0	1	1	2.55	2	2	1	1	0	0	0	1	3.57	2	2	1	1	0	0	1	1	2.41	2	2	1	1	0	0	1	1	2.41	2
0	77	6	2	156	55	22.6003	2007-09	20	20	0	4	6	0	1	1	0	0	0	0	1	2.25	2	2	1	0	0	0	0	1	2.25	2	2	1	0	0	0	0	2		2	2	1	0	0	0	0	1	2.2	2
1	87	6	2	174	82	27.0842	2007-09	20	13	-7	5	6	0	1	1	0	0	0	0	1	2.06	2	2	1	0	0	0	0	1	1.39	2	2	1	0	0	0	0	1	1.2	2	2	1	0	0	0	0	1	1.26	2
1	67	4	2	162	60	22.8624	2008-11	0	0	0	2	3	0	1	1	1	1	0	0	1	1.64	4		0	0	0	0	0			4		0	0	0	0	0			2	3	1	0	0	0	0	1	1.59	4
1	77	6	2	170	80	27.6817	2007-10	14	12	-2	4	5	0	1	1	0	0	0	0	1	2.29	2	2	1	0	0	0	0	1	1.56	2	2	1	0	0	0	0	2		2	2	1	0	0	0	0	2		2
0	62	3	1	155	63	26.2227	2007-10	1	0	-1	3	4	0	1	1	1	0	0	1	1	1.73	2	2	1	1	0	0	0	1	3.93	2	2	1	1	0	0	1	1	2.13	4		0	0	0	0	0			2
1	87	6	2	164	48	17.8465	2007-09	14	0	-14	4	5	0	1	1	1	0	0	1	1	3.36	4		0	0	0	0	0			4		0	0	0	0	0			2	2	1	1	0	0	1	2		2
0	73	5	2	142	45	22.317	2007-10	3	3	0	3	5	0	1	1	1	0	0	1	1	3.08	2	2	1	1	0	0	0	1	4.1	2	2	1	1	0	0	1	1	3.86	4		0	0	0	0	0
1	71	5	2	163	62	23.3355	2007-09	6	4	-2	4	5	0	1	0	1	0	0	1	1	2.69	2	3	1	1	0	0	0	1	2.15	4		0	0	0	0	0			2	2	1	1	0	0	1	1	2.57	4
1	72	5	2	169	68	23.8087	2007-09	2	1	-1	3	4	0	1	1	1	0	0	1	1	2.72	2	2	1	1	0	0	0	1	2.2	2	2	1	1	0	0	1	1	1.87	2	2	1	1	0	0	1	1	1.21	2
0	86	6	2	155	40	16.6493	2007-09	19	15	-4	4	6	0	1	1	1	0	0	1	1	2.71	4		0	0	0	0	0			4		0	0	0	0	0			4		0	0	0	0	0			4
1	85	6	2	99999	99999		2007-08	2	0	-2	5	6	0	1	1	0	0	0	0	1	3.03	4		0	0	0	0	0			2	2	1	0	0	0	0	1	2.68	2	2	1	0	0	0	0	1	1.43	2
0	79	6	2	152	38.5	16.6638	2007-08	5	1	-4	4	6	0	1	1	0	0	0	0	1	3.46	2	2	1	0	0	0	0	1	3.67	2	2	1	0	0	0	0	1	2.13	4		0	0	0	0	0			2
0	72	5	2	158	68	27.2392	2007-08	17	7	-10	2	4	0	1	1	1	0	0	1	1	1.39	2	3	1	0	0	0	0	1	1.25	2	2	1	0	0	0	0	1	2.95	2	2	1	0	0	0	0	1	3.2	2
1	66	4	2	171	67	22.913	2008-11	1	1	0	3	4	0	1	1	0	0	0	0	1	2.21	4		0	0	0	0	0			2	2	1	0	0	0	0	1	1.33	2	2	1	0	0	0	0	1	1.2	2
1	67	4	2	170	76	26.2976	2007-06	14	1	-13	3	4	0	1	1	1	1	0	1	1	2.28	4		0	0	0	0	0			2	2	1	1	1	0	1	1	2.24	2	2	1	1	1	0	1	1	2.13	2
0	64	3	1	99999	99999		2007-06	20	9	-11	3	4	0	1	1	0	0	0	0	1	2.57	4		0	0	0	0	0			2	2	1	0	0	0	0	1	1.61	2	2	1	0	0	0	0	1	2.39	2
1	60	3	1	177	76	24.2587	2007-06	6	1	-5	2	2	0	1	1	1	0	0	1	1	2.88	4		0	0	0	0	0			2	2	1	1	0	0	1	1	1.17	2	2	1	1	0	0	1	1	1.2	2
1	67	4	2	158	58	23.2335	2007-06	0	0	0	3	5	0	1	1	1	0	0	1	1	2.35	4		0	0	0	0	0			2	3	1	1	0	1	0	1	2.1	4		0	0	0	0	0			2
0	65	4	2	99999	99999		2007-06	18	4	-14	3	5	0	1	1	1	0	0	1	1	2.57	2	2	1	1	0	0	0	1	1.86	2	2	1	1	0	0	1	2		2	2	1	1	0	0	1	2		2
1	67	4	2	158	58	23.2335	2007-06	1	0	-1	2	4	0	1	1	1	0	0	1	1	2.72	3	3	1	1	0	1	0	1	3.11	2	3	1	1	0	1	0	1	2.1	4		0	0	0	0	0			2
1	57	2	1	176	88	28.4091	2007-06	0	0	0	3	3	0	1	1	0	0	0	0	1	1.63	2	2	1	0	0	0	0	1	2.13	4		0	0	0	0	0			4		0	0	0	0	0			4
1	66	4	2	169	74	25.9095	2007-05	2	0	-2	3	4	0	1	1	0	0	0	0	1	1.76	2	2	1	0	0	0	0	1	2.82	2	2	1	0	0	0	0	1	1.69	2	2	1	0	0	0	0	1	3.7	2
0	85	6	2	155	68	28.3039	2007-05	17	1	-16	5	7	0	1	1	0	0	0	0	1	3.14	2	3	1	1	0	0	0	1	1.09	2	2	1	1	0	0	1	1	3.16	2	2	1	1	0	0	1	1	2.06	4
1	80	6	2	165	55.5	20.3857	2007-05	5	1	-4	4	5	0	2	0	0	0	0	0	1	4.3	2	3	1	0	0	0	0	1	1.45	2	2	1	0	0	0	0	1	1.86	2	2	1	0	0	0	0	1	1.23	2
0	75	6	2	163	52	19.5717	2008-10	0	0	0	4	7	0	1	1	1	0	0	1	1	2.91	2	2	1	1	0	0	0	1	1.98	4		0	0	0	0	0			4		0	0	0	0	0			4
1	71	5	2	175	99999		2007-05	14	11	-3	3	4	0	1	1	1	0	0	1	1	2.02	2	2	1	1	0	0	0	1	4.64	4		0	0	0	0	0			2	2	1	1	0	0	1	1	1.72	2
1	60	3	1	165	66	24.2424	2007-05	1	0	-1	4	4	0	1	1	0	0	0	0	1	3.08	2	2	1	0	0	0	0	1	1.8	2	2	1	0	0	0	0	1	1.17	2	2	1	0	0	0	0	1	2.99	2
1	72	5	2	170	85	29.4118	2007-05	9	9	0	3	4	0	1	1	0	0	0	0	1	1.65	2	2	1	0	0	0	0	1	1.85	2	2	1	0	0	0	0	1	1.9	2	2	1	0	0	0	0	1	2.67	4
0	72	5	2	158	63	25.2363	2007-04	0	0	0	4	6	0	1	1	1	0	0	1	1	1.95	2	2	1	1	0	0	0	1	1.73	4		0	0	0	0	0			2	2	1	1	0	0	1	1	4.31	2
1	79	6	2	168	67	23.7387	2007-05	0	0	0	4	5	0	1	1	0	0	0	0	1	3.64	2	2	1	0	0	0	0	1	1.5	2	2	1	0	0	0	0	1	3.03	2	2	1	0	0	0	0	1	4.92	2
1	64	3	1	167	62	22.231	2007-04	3	2	-1	4	4	0	1	1	1	0	0	1	1	2.84	4		0	0	0	0	0			2	2	1	1	0	0	1	1	3.97	2	2	1	1	0	0	1	1	4.15	2
1	61	3	1	173	82.5	27.5652	2007-04	20	3	-17	2	2	0	1	1	1	0	0	1	1	2.73	2	2	1	1	0	0	0	1	2.79	4		0	0	0	0	0			2	2	1	1	0	0	1	1	4.51	2
1	73	5	2	172	65	21.9713	2007-04	23	9	-14	3	5	0	1	1	1	0	0	1	1	3.68	2	3	1	1	1	0	0	2		4		0	0	0	0	0			4		0	0	0	0	0			4
0	70	5	2	158	58.2	23.3136	2007-04	0	0	0	3	5	0	1	1	0	0	0	0	1	2.18	2	2	1	0	0	0	0	1	2.15	4		0	0	0	0	0			4		0	0	0	0	0			2
1	82	6	2	165	65	23.8751	2007-03	1	0	-1	4	5	0	1	1	1	0	0	1	1	2.14	2	2	1	1	0	0	0	1	3.55	4		0	0	0	0	0			4		0	0	0	0	0			2
0	81	6	2	156	50	20.5457	2008-10	2	0	-2	4	6	0	1	1	0	0	0	0	1	2.15	2	2	1	0	0	0	0	1	2.19	4		0	0	0	0	0			4		0	0	0	0	0			4
1	69	4	2	158	68	27.2392	2007-03	8	1	-7	3	4	0	1	1	1	0	0	1	1	2.29	2	3	1	0	0	0	0	1	2.76	4		0	0	0	0	0			2	2	1	0	0	0	0	1	1.23	2
0	86	6	2	153	59	25.204	2007-03	2	1	-1	5	7	0	1	1	1	0	0	1	1	1.96	2	2	1	1	0	0	0	1	3.32	4		0	0	0	0	0			2	3	0	1	0	1	1	2		2
1	63	3	1	160	61.2	23.9062	2007-03	14	6	-8	3	3	0	1	1	1	0	1	0	1	2.21	4		0	0	0	0	0			4		0	0	0	0	0			2	2	1	1	0	1	0	2		2
0	59	2	1	153	51	21.7865	2007-03	0	0	0	2	3	0	1	1	0	0	0	0	1	1.96	2	2	1	0	0	0	0	1	1.67	2	2	1	0	0	0	0	1	1.86	2	2	1	0	0	0	0	1	1.76	2
1	77	6	2	99999	99999		2007-03	1	1	0	4	5	0	1	1	1	0	0	1	1	2.06	2	2	1	1	0	0	0	1	2.98	2	2	1	1	0	0	1	1	2.92	2	2	1	1	0	0	1	1	2.16	2
1	52	1	1	165	73	26.8136	2007-03	17	6	-11	3	3	0	1	1	1	0	0	1	1	1.75	2	2	1	1	0	0	0	1	1.68	2	2	1	1	0	0	1	1	1.09	2	2	1	1	0	0	1	1	2.55	2
1	76	6	2	175	62	20.2449	2007-03	14	11	-3	4	5	0	1	1	0	0	0	0	1	2.88	4		0	0	0	0	0			4		0	0	0	0	0			2	2	1	0	0	0	0	1	1.35	2
0	62	3	1	160	56	21.875	2007-02	13	11	-2	4	5	0	1	1	0	0	0	0	1	2.92	2	2	1	0	0	0	0	1	3.19	4		0	0	0	0	0			2	2	1	0	0	0	0	1	2.44	2
1	58	2	1	170	62	21.4533	2007-02	2	1	-1	2	2	0	1	1	1	0	0	1	1	2.97	4		0	0	0	0	0			2	2	1	1	0	0	1	1	2.42	4		0	0	0	0	0			2
0	83	6	2	160	70	27.3438	2007-02	15	7	-8	3	5	0	1	1	1	0	0	1	1	2.58	2	2	1	1	0	0	0	1	5.14	2	2	1	1	0	0	1	1	1.6	4		0	0	0	0	0			4
0	83	6	2	155	45	18.7305	2006-12	16	15	-1	3	5	0	1	1	0	0	0	0	1	1.96	2	2	1	0	0	0	0	1	2.21	4		0	0	0	0	0			4		0	0	0	0	0			4
0	78	6	2	155	53	22.0604	2008-11	7	6	-1	5	7	0	1	1	0	0	0	0	1	2.72	2	2	1	0	0	0	0	1	1.43	2	2	1	0	0	0	0	1	2.16	2	2	1	0	0	0	0	1	2.27	2
0	76	6	2	153	62	26.4855	2007-12	8	8	0	4	6	0	1	1	0	0	0	0	1	1.16	2	2	1	0	0	0	0	1	1.72	2	2	1	0	0	0	0	1	1.21	2	2	1	0	0	0	0	1	1.77	2
1	69	4	2	165	58	21.3039	2007-11	4	4	0	4	5	0	1	1	0	0	0	0	1	1.78	2	2	1	0	0	0	0	1	1.44	4		0	0	0	0	0			4		0	0	0	0	0			4
0	66	4	2	162	43	16.3847	2007-11	3	3	0	2	4	0	1	1	0	0	0	0	1	2.67	2	2	1	0	0	0	0	1	1.11	2	2	1	0	0	0	0	1	4.53	2	2	1	0	0	0	0	1	3.9	2
0	81	6	2	165	67	24.6097	2007-11	4	4	0	4	6	0	1	1	0	0	0	0	1	2.69	2	2	1	0	0	0	0	1	2.34	2	2	1	0	0	0	0	1	2.72	2	2	1	0	0	0	0	1	1.83	2
0	60	3	1	157	60	24.3418	2007-11	2	2	0	3	4	0	1	1	0	0	0	0	1	1.57	2	2	1	0	0	0	0	1	2.13	2	2	1	0	0	0	0	1	1.91	2	2	1	0	0	0	0	1	2.59	2
1	47	1	1	158	69	27.6398	2007-11	4	2	-2	3	4	0	1	1	0	0	0	0	1	2.7	3	4	0	0	0	0	0	2				0	0	0	0	0					0	0	0	0	0
1	71	5	2	170	55	19.0311	2007-11	16	18	2	2	2	0	1	1	0	0	0	0	1	2.27	4		0	0	0	0	0			4		0	0	0	0	0			4		0	0	0	0	0			4
1	64	3	1	167	68	24.3824	2007-11	4	3	-1	3	3	0	1	1	0	0	0	0	1	2.23	2	2	1	0	0	0	0	1	3.13	2	2	1	0	0	0	0	1	3.1	2	2	1	0	0	0	0	1	2.59	2
1	75	6	2	167	60	21.5139	2007-11	12	3	-9	5	6	0	1	1	0	0	0	0	1	2.59	2	2	1	0	0	0	0	1	2.14	2	2	1	0	0	0	0	1	3.26	2	2	1	0	0	0	0	1	1.69	2
0	60	3	1	155	75	31.2175	2007-11	10	1	-9	2	4	0	1	1	1	0	0	1	1	1.3	2	2	1	1	0	0	0	1	2.51	2	2	1	1	0	0	1	1	2.77	2	2	1	1	0	0	1	1	3.34	2
0	74	5	2	167	70	25.0995	2008-11	20	19	-1	4	6	0	1	1	0	0	0	0	1	3.9	4		0	0	0	0	0			4		0	0	0	0	0			4		0	0	0	0	0			4
1	75	6	2	170	56	19.3772	2007-10	12	10	-2	4	5	0	1	1	0	0	0	0	1	2.82	2	2	1	0	0	0	0	1	3.06	4		0	0	0	0	0			4		0	0	0	0	0			4
1	73	5	2	172	58	19.6052	2007-10	12	10	-2	3	5	0	1	1	0	0	0	0	1	1.86	4		0	0	0	0	0			4		0	0	0	0	0			4		0	0	0	0	0			4
0	73	5	2	166	55	19.9594	2007-10	7	2	-5	2	4	0	1	0	1	0	0	1	1	1.98	4		0	0	0	0	0			4		0	0	0	0	0			4		0	0	0	0	0			4
1	79	6	2	180	84	25.9259	2007-10	7	2	-5	4	5	0	1	1	0	0	0	0	1	2.25	2	2	1	0	0	0	0	1	2.47	2	2	1	0	0	0	0	1	2.42	2	2	1	0	0	0	0	1	2.3	2
0	67	4	2	160	55	21.4844	2007-10	22	20	-2	4	7	0	1	1	1	0	0	1	1	1.31	3	4	0	0	0	0	0	1	1.21			0	0	0	0	0					0	0	0	0	0
0	68	4	2	152	48	20.7756	2007-10	11	7	-4	4	6	0	1	1	0	0	0	0	1	3.48	2	2	1	0	0	0	0	1	1.16	2	2	1	0	0	0	0	1	2.55	2	2	1	0	0	0	0	1	1.44	2
1	65	4	2	168	72	25.5102	2007-10	2	2	0	3	4	0	1	1	1	0	0	1	1	2.84	2	2	1	1	0	0	0	1	1.67	2	2	1	1	0	0	1	1	3.51	2	2	1	1	0	0	1	1	1.55	2
1	66	4	2	165	75	27.5482	2007-09	1	0	-1	3	4	0	1	1	0	0	0	0	1	1.17	2	2	1	0	0	0	0	1	1.18	2	2	1	0	0	0	0	1	1.17	2	2	1	0	0	0	0	1	1.24	2
1	74	5	2	159	52	20.5688	2007-09	18	17	-1	3	4	0	1	1	0	0	0	0	1	6.15	2	2	1	0	0	0	0	1	3.23	4		0	0	0	0	0			4		0	0	0	0	0			4
0	73	5	2	155	62	25.8065	2007-09	9	9	0	3	5	0	1	1	0	0	0	0	1	1.49	2	2	1	0	0	0	0	1	1.71	2	2	1	0	0	0	0	1	2.37	2	2	1	0	0	0	0	1	1.66	2
0	48	1	1	157	56	22.719	2008-11	18	21	3	4	5	0	1	1	0	0	0	0	1	2.51	2	2	1	0	0	0	0	1	2.32	2	2	1	0	0	0	0	1	1.44	2	2	1	0	0	0	0	1	2.78	2
1	68	4	2	174	74	24.4418	2007-09	8	8	0	2	3	0	1	1	0	0	0	0	1	1.55	2	2	1	0	0	0	0	1	1.7	4		0	0	0	0	0			4		0	0	0	0	0			4
1	76	6	2	170	66	22.8374	2007-08	2	2	0	5	7	0	1	0	1	1	0	0	1	1.02	4		0	0	0	0	0			4		0	0	0	0	0			4		0	0	0	0	0			2
1	61	3	1	173	78	26.0617	2007-08	18	7	-11	2	3	0	1	1	1	0	0	1	1	1.7	2	2	1	1	0	0	0	1	1.65	2	2	1	1	0	0	1	1	2.32	2	2	1	1	0	0	1	1	2.55	2
1	79	6	2	165	61	22.4059	2007-08	2	2	0	5	7	0	1	0	1	1	0	0	1	1.2	2	2	0	1	1	0	0	1	1.11	2	2	0	1	1	0	0	2		2	2	0	1	1	0	0	1	1.78	2
1	47	1	1	172	71	23.9995	2007-08	9	7	-2	2	3	0	1	1	0	0	0	0	1	2.65	2	2	1	0	0	0	0	1	2.7	2	2	1	0	0	0	0	1	1.63	2	2	1	0	0	0	0	1	1.66	2
1	70	5	2	177	78	24.8971	2007-08	4	2	-2	4	5	0	1	1	1	1	0	0	1	2.55	2	2	1	1	1	0	0	1	0.97	2	2	1	1	1	0	0	1	1.63	2	2	1	1	1	0	0	1	1.67	2
1	43	1	1	170	70	24.2215	2007-07	17	14	-3	2	3	0	1	1	0	0	0	0	1	1.72	2	2	1	0	0	0	0	1	1.37	2	2	1	0	0	0	0	1	1.38	2	2	1	0	0	0	0	1	2.19	2
0	72	5	2	148	46	21.0007	2007-07	10	7	-3	2	4	0	1	1	1	1	0	0	1	1.58	2	2	1	1	1	0	0	1	1.95	4		0	0	0	0	0			4		0	0	0	0	0			4
1	72	5	2	168	68	24.093	2007-07	14	14	0	3	4	0	1	0	1	1	0	0	1	0.99	3	4	0	0	0	0	0	2				0	0	0	0	0					0	0	0	0	0
1	65	4	2	165	55	20.202	2007-07	12	2	-10	3	5	0	1	0	1	1	1	0	1	0.83	4		0	0	0	0	0			4		0	0	0	0	0			4		0	0	0	0	0			4
1	72	5	2	165	40	14.6924	2008-11	4	2	-2	2	3	0	1	1	0	0	0	0	1	1.22	2	2	1	0	0	0	0	1	1.3	2	2	1	0	0	0	0	1	3.19	2	2	1	0	0	0	0	1	4.58	2
1	69	4	2	168	67	23.7387	2007-07	7	5	-2	2	3	0	1	1	0	0	0	0	1	1.58	2	2	1	0	0	0	0	1	2.92	2	2	1	0	0	0	0	1	3.66	2	2	1	0	0	0	0	1	1.91	2
0	71	5	2	158	52	20.83	2007-06	5	3	-2	3	5	0	1	0	1	0	1	0	1	1.07	2	2	0	1	0	1	0	2		4		0	0	0	0	0			4		0	0	0	0	0			2
1	48	1	1	170	75	25.9516	2007-06	9	6	-3	2	2	0	1	1	0	0	0	0	1	2.96	2	2	1	0	0	0	0	1	4.91	2	2	1	0	0	0	0	1	2.25	2	2	1	0	0	0	0	1	2.03	2
0	67	4	2	150	51	22.6667	2007-06	19	18	-1	3	5	0	1	1	0	0	0	0	1	2.54	2	2	1	0	0	0	0	1	1.86	2	2	1	0	0	0	0	1	2.23	2	2	1	0	0	0	0	1	2.07	2
0	46	1	1	156	65	26.7094	2007-04	18	14	-4	2	3	0	1	1	0	0	0	0	1	1.23	2	2	1	0	0	0	0	1	1.16	2	2	1	0	0	0	0	1	1.22	2	2	1	0	0	0	0	1	1.29	2
1	71	5	2	162	60	22.8624	2007-04	7	3	-4	4	5	0	1	0	1	1	1	0	1	2.45	4		0	0	0	0	0			4		0	0	0	0	0			4		0	0	0	0	0			4
0	75	6	2	160	44	17.1875	2007-04	5	4	-1	4	6	0	1	1	0	0	0	0	1	1	2	2	1	0	0	0	0	1	1.42	2	2	1	0	0	0	0	1	2.45	4		0	0	0	0	0			4
0	76	6	2	162	73	27.8159	2007-04	12	8	-4	5	7	0	1	1	1	1	0	0	1	1.38	2	2	1	1	1	0	0	1	2.16	2	2	1	1	1	0	0	1	1.55	2	2	1	1	1	0	0	1	2.8	2
1	46	1	1	176	68	21.9525	2007-03	6	1	-5	3	4	0	1	1	0	0	0	0	1	1	2	2	1	0	0	0	0	1	1.52	2	2	1	0	0	0	0	1	2.01	3	4	0	0	0	0	0	1	6.75
1	70	5	2	168	72	25.5102	2007-03	9	0	-9	4	5	0	1	1	1	1	0	0	1	2.89	2	2	1	1	1	0	0	1	1.78	2	2	1	1	1	0	0	1	2.01	2	3	1	0	0	0	0	1	6.75	2
0	67	4	2	158	65	26.0375	2008-11	4	2	-2	3	4	0	1	1	0	0	0	0	1	1.11	2	2	1	0	0	0	0	1	1.16	2	2	1	0	0	0	0	1	1.27	2	2	1	0	0	0	0	1	1.71	2
0	72	5	2	158	68	27.2392	2007-02	15	10	-5	3	5	0	1	0	1	1	1	0	1	1.22	2	2	0	1	1	1	0	2		4		0	0	0	0	0			4		0	0	0	0	0			4
1	43	1	1	176	96	30.9917	2007-01	2	2	0	3	3	0	1	1	0	0	0	0	1	1.41	2	2	1	0	0	0	0	1	1.91	2	2	1	0	0	0	0	1	1.33	4		0	0	0	0	0			2
1	72	5	2	165	63	23.1405	2007-01	1	0	-1	2	3	0	1	1	0	0	0	0	1	2	2	2	1	0	0	0	0	1	1.01	4		0	0	0	0	0			2	2	1	0	0	0	0	1	1.09	2
1	67	4	2	178	75	23.6713	2007-01	20	18	-2	3	4	0	1	1	0	0	0	0	1	1.6	4		0	0	0	0	0			4		0	0	0	0	0			4		0	0	0	0	0			4
0	68	4	2	168	67	23.7387	2007-01	10	7	-3	3	5	0	1	0	1	1	0	0	1	1	2	2	0	1	1	0	0	2		2	2	0	1	1	0	0	2		2	2	0	1	1	0	0	2		2
0	71	5	2	168	42	14.881	2007-01	18	11	-7	2	4	0	1	1	0	0	0	0	1	2.77	2	2	1	0	0	0	0	1	1.98	2	2	1	0	0	0	0	1	1.68	2	2	1	0	0	0	0	1	2.52	2
0	67	4	2	153	54	23.0681	2007-01	2	2	0	3	6	0	1	1	1	1	0	0	1	2.15	4		0	0	0	0	0			4		0	0	0	0	0			2	2	1	1	1	0	0	1	1.69	2
1	71	5	2	165	65	23.8751	2007-01	14	14	0	3	4	0	1	1	0	0	0	0	1	4.4	2	2	1	0	0	0	0	1	2.35	4		0	0	0	0	0			4		0	0	0	0	0			4
0	81	6	2	156	65	26.7094	2007-01	14	14	0	4	7	0	1	1	0	0	0	0	1	2.18	2	2	1	0	0	0	0	1	1.3	4		0	0	0	0	0			4		0	0	0	0	0			4
0	79	6	2	152	46	19.91	2007-01	13	11	-2	4	6	0	1	1	0	0	0	0	1	2.82	3	4	0	0	0	0	0	1	6.16			0	0	0	0	0					0	0	0	0	0
0	77	6	2	170	65	22.4913	2008-11	7	7	0	5	7	0	1	1	0	0	0	0	1	1.51	4		0	0	0	0	0			4		0	0	0	0	0			4		0	0	0	0	0			4
1	41	1	1	168	60	21.2585	2007-01	11	16	5	2	2	0	1	1	0	0	0	0	1	0.98	3	4	0	0	0	0	0	2				0	0	0	0	0					0	0	0	0	0
1	41	1	1	175	78	25.4694	2008-11	7	0	-7	3	4	0	1	1	0	0	0	0	1	2.44	2	2	1	0	0	0	0	1	1.87	4		0	0	0	0	0			2	2	1	0	0	0	0	1	1.99	2
0	85	6	2	153	50	21.3593	2008-10	14	11	-3	5	7	0	1	1	0	0	0	0	1	2.47	2	2	1	0	0	0	0	1	1.2	2	2	1	0	0	0	0	1	2.49	2	2	1	0	0	0	0	1	2.49	2
1	71	5	2	164	73	27.1416	2008-10	4	4	0	2	3	0	1	1	0	0	0	0	1	2.23	2	2	1	0	0	0	0	1	1.97	4		0	0	0	0	0			4		0	0	0	0	0			2
0	72	5	2	160	63	24.6094	2008-10	14	14	0	5	7	0	1	1	0	0	0	0	1	2.39	4		0	0	0	0	0			4		0	0	0	0	0			4		0	0	0	0	0			4
1	69	4	2	165	62	22.7732	2006-12	9	5	-4	2	3	0	1	1	0	0	0	0	1	2.91	2	2	1	0	0	0	0	1	2.32	4		0	0	0	0	0			2	2	1	0	0	0	0	1	1.86	2
1	68	4	2	170	65.8	22.7682	2008-10	2	2	0	3	4	0	1	1	0	0	0	0	1	2.27	2	2	1	0	0	0	0	1	2.37	2	2	1	0	0	0	0	1	1.78	2	2	1	0	0	0	0	1	1.51	2
0	75	6	2	148	50	22.8269	2008-10	4	2	-2	3	6	0	1	1	0	0	0	0	1	3.34	2	2	1	0	0	0	0	1	3.21	2	2	1	0	0	0	0	1	2.9	2	2	1	0	0	0	0	1	2.1	2
1	67	4	2	157	43	17.4449	2008-10	2	2	0	5	7	0	2	0	0	0	0	0	1	8.36	4		0	0	0	0	0			4		0	0	0	0	0			4		0	0	0	0	0			4
0	84	6	2	142	48	23.8048	2008-10	3	3	0	5	8	0	1	1	0	0	0	0	1	2.61	4		0	0	0	0	0			4		0	0	0	0	0			4		0	0	0	0	0			4
1	70	5	2	165	65	23.8751	2008-10	8	8	0	3	4	0	1	1	0	0	0	0	1	0.98	4		0	0	0	0	0			4		0	0	0	0	0			4		0	0	0	0	0			4
0	71	5	2	158	65	26.0375	2008-09	3	3	0	3	5	0	1	1	0	0	0	0	1	1.93	2	2	1	0	0	0	0	1	4.4	3	2	1	0	0	0	0	1	1.2	2	2	1	0	0	0	0	1	2.51	4
0	65	4	2	167	51.5	18.4661	2008-09	11	8	-3	4	7	0	1	0	1	1	0	0	1	1.09	2	2	0	1	1	0	0	2		2	2	0	1	1	0	0	2		4		0	0	0	0	0			4
0	69	4	2	167	42	15.0597	2008-09	11	7	-4	4	6	0	1	1	0	0	0	0	1	2.57	2	2	1	0	0	0	0	1	2.74	3	2	1	0	0	0	0	1	1.58	2	2	1	0	0	0	0	1	1.07	4
1	82	6	2	99999	99999		2008-09	10	12	2	4	5	0	1	1	0	0	0	0	1	1.12	4		0	0	0	0	0			4		0	0	0	0	0			4		0	0	0	0	0			4
0	65	4	2	170	68	23.5294	2008-09	15	15	0	3	5	0	1	1	0	0	0	0	1	1.7	2	2	1	0	0	0	0	1	1.43	2	2	1	0	0	0	0	1	1.25	4		0	0	0	0	0			2
1	57	2	1	165	65	23.8751	2008-12	0	0	0	2	2	0	1	1	0	0	0	0	1	0.85	4		0	0	0	0	0			2	2	1	0	0	0	0	1	1.13	2	2	1	0	0	0	0	1	3.51	2
1	49	1	1	172	81	27.3797	2008-09	1	0	-1	3	3	0	1	1	0	0	0	0	1	3.02	2	2	1	0	0	0	0	1	2.48	2	2	1	0	0	0	0	1	1.65	2	2	1	0	0	0	0	1	2.25	2
1	64	3	1	168	68	24.093	2008-09	21	6	-15	3	3	0	1	1	0	0	0	0	1	1.93	2	2	1	0	0	0	0	1	2.42	2	2	1	0	0	0	0	1	1.68	2	2	1	0	0	0	0	1	1.57	2
1	64	3	1	168	66	23.3844	2008-09	10	9	-1	2	2	0	1	1	0	0	0	0	1	2.27	2	2	1	0	0	0	0	1	1.66	2	2	1	0	0	0	0	1	1.42	2	2	1	0	0	0	0	1	1.8	2
0	77	6	2	156	42	17.2584	2008-08	7	3	-4	5	7	0	1	1	0	0	0	0	1	2.63	2	2	1	0	0	0	0	1	2.43	2	2	1	0	0	0	0	1	1.82	2	2	1	0	0	0	0	1	1.79	2
1	66	4	2	177	80	25.5354	2008-08	3	3	0	3	4	0	1	1	0	0	0	0	1	2.8	2	2	1	0	0	0	0	1	2.77	2	2	1	0	0	0	0	1	3.05	2	2	1	0	0	0	0	1	2.47	3
1	69	4	2	171	64	21.8871	2008-08	6	6	0	3	5	0	1	1	0	0	0	0	1	2.56	4		0	0	0	0	0			4		0	0	0	0	0			4		0	0	0	0	0			4
1	59	2	1	177	75	23.9395	2008-08	1	0	-1	2	2	0	1	1	0	0	0	0	1	1.16	2	2	1	0	0	0	0	1	2.35	4		0	0	0	0	0			2	2	1	0	0	0	0	1	1.91	2
1	51	1	1	175	85	27.7551	2008-08	14	8	-6	2	2	0	1	1	0	0	0	0	1	1.87	2	2	1	0	0	0	0	1	1.27	2	2	1	0	0	0	0	1	1.12	4		0	0	0	0	0			4
0	75	6	2	154	46	19.3962	2008-08	17	17	0	5	7	0	1	0	1	1	0	0	1	1.07	4		0	0	0	0	0			4		0	0	0	0	0			4		0	0	0	0	0			4
1	48	1	1	170	71	24.5675	2008-08	6	10	4	3	4	0	1	0	1	0	0	1	1	1.02	2	2	0	1	0	0	0	1	2.93	2	2	0	1	0	0	1	1	2.52	4		0	0	0	0	0			2
0	57	2	1	158	50	20.0288	2008-12	25	24	-1	3	4	0	1	1	0	0	0	0	1	1.64	4		0	0	0	0	0			4		0	0	0	0	0			4		0	0	0	0	0			4
1	69	4	2	150	47	20.8889	2008-08	13	3	-10	3	5	0	1	1	0	0	0	0	1	3.2	2	2	1	0	0	0	0	1	2.78	2	2	1	0	0	0	0	1	1.31	2	2	1	0	0	0	0	1	2.09	2
1	80	6	2	170	80	27.6817	2008-07	11	9	-2	4	5	0	1	1	0	0	0	0	1	2.82	2	2	1	0	0	0	0	1	1.16	2	2	1	0	0	0	0	1	1.68	2	2	1	0	0	0	0	1	0.96	2
0	66	4	2	155	60	24.974	2008-07	14	13	-1	3	6	0	1	1	0	0	0	0	1	2.34	3	2	1	0	0	0	0	1	1.19	2	2	1	0	0	0	0	1	2.23	2	2	1	0	0	0	0	1	2.47	4
0	84	6	2	150	46	20.4444	2008-07	3	2	-1	5	7	0	1	0	1	0	0	1	1	1.35	2	2	0	1	0	0	0	1	0.99	4		0	0	0	0	0			2	2	0	1	0	0	1	1	0.95	2
0	64	3	1	157	63	25.5588	2008-07	2	2	0	3	4	0	1	1	0	0	0	0	1	2.27	4		0	0	0	0	0			2	2	1	0	0	0	0	1	2.45	4		0	0	0	0	0			2
0	73	5	2	99999	99999		2008-07	8	5	-3	3	6	0	1	1	0	0	0	0	1	1.85	2	2	1	0	0	0	0	1	1.7	2	2	1	0	0	0	0	1	1.81	2	2	1	0	0	0	0	1	3.83	2
0	77	6	2	160	64.5	25.1953	2008-06	2	2	0	6	9	0	1	1	0	0	0	0	1	1.31	2	2	1	0	0	0	0	1	1.76	4		0	0	0	0	0			2	2	1	0	0	0	0	1	1.04	2
1	76	6	2	158	53	21.2306	2008-06	7	7	0	4	5	0	1	1	0	0	0	0	1	1.07	2	2	1	0	0	0	0	1	1.53	2	2	1	0	0	0	0	1	1.64	2	2	1	0	0	0	0	1	1.55	2
0	70	5	2	168	75	26.5731	2008-06	4	4	0	2	4	0	1	1	0	0	0	0	1	3.23	2	2	1	0	0	0	0	1	1.34	4		0	0	0	0	0			2	2	1	0	0	0	0	1	2.67	4
0	70	5	2	150	50	22.2222	2008-06	5	0	-5	4	6	0	1	1	0	0	0	0	1	0.88	4		0	0	0	0	0			4		0	0	0	0	0			4		0	0	0	0	0			4
1	77	6	2	170	59	20.4152	2008-12	6	4	-2	4	5	0	1	1	0	0	0	0	1	2.73	4		0	0	0	0	0			2	2	1	0	0	0	0	1	1.35	4		0	0	0	0	0			2
0	62	3	1	158	56	22.4323	2008-06	0	0	0	2	3	0	1	1	0	0	0	0	1	2.65	2	2	1	0	0	0	0	1	2.81	2	2	1	0	0	0	0	1	3.32	2	2	1	0	0	0	0	1	2.3	2
1	77	6	2	166	68	24.677	2008-06	13	0	-13	4	5	0	1	1	0	0	0	0	1	3.71	4		0	0	0	0	0			4		0	0	0	0	0			4		0	0	0	0	0			4
0	57	2	1	158	53	21.2306	2008-06	13	0	-13	2	4	0	1	1	0	0	0	0	1	1.48	2	2	1	0	0	0	0	1	1.81	2	2	1	0	0	0	0	1	2.38	2	2	1	0	0	0	0	1	1.32	2
1	63	3	1	165	61	22.4059	2008-06	2	0	-2	2	3	0	1	1	0	0	0	0	1	2.9	2	4	0	0	0	0	0	1	6.68	2	3	1	0	0	0	0	1	1.07	2	2	1	0	0	0	0	1	2.58	2
1	71	5	2	170	62	21.4533	2008-05	13	11	-2	4	6	0	1	1	0	0	0	0	1	2.14	4		0	0	0	0	0			4		0	0	0	0	0			4		0	0	0	0	0			4
1	55	2	1	159	75	29.6665	2008-06	22	30	8	2	2	0	1	1	0	0	0	0	1	1.01	4		0	0	0	0	0			4		0	0	0	0	0			3	4	0	0	0	0	0	2
0	71	5	2	160	58	22.6562	2008-05	15	11	-4	3	5	0	1	1	0	0	0	0	1	3.63	4		0	0	0	0	0			4		0	0	0	0	0			4		0	0	0	0	0			4
1	63	3	1	165	60	22.0386	2008-05	15	4	-11	2	2	0	1	1	0	0	0	0	1	2.63	2	4	0	0	0	0	0	1	5.73	2	3	1	0	0	0	0	1	3.86	2	2	1	0	0	0	0	1	1.41	2
1	72	5	2	165	60	22.0386	2008-05	10	5	-5	2	3	0	1	1	0	0	0	0	1	2.93	2	2	1	0	0	0	0	1	2.15	2	2	1	0	0	0	0	1	2.48	2	2	1	0	0	0	0	1	1.57	2
0	71	5	2	155	50	20.8117	2008-05	13	8	-5	2	4	0	1	1	0	0	0	0	1	1.12	4		0	0	0	0	0			4		0	0	0	0	0			4		0	0	0	0	0			4
1	73	5	2	173	70	23.3887	2008-11	16	11	-5	2	3	0	1	1	0	0	0	0	1	1.91	2	2	1	0	0	0	0	1	1.57	2	2	1	0	0	0	0	1	1.99	2	2	1	0	0	0	0	1	1.79	2
1	63	3	1	162	57	21.7192	2008-05	11	11	0	3	3	0	1	1	0	0	0	0	1	2.36	2	2	1	0	0	0	0	1	2.77	2	2	1	0	0	0	0	1	2.72	4		0	0	0	0	0			4
0	50	1	1	165	50	18.3655	2008-05	10	18	8	2	3	0	1	1	0	0	0	0	1	2.52	4		0	0	0	0	0			4		0	0	0	0	0			4		0	0	0	0	0			4
0	49	1	1	155	50	20.8117	2008-04	11	6	-5	2	3	0	1	1	0	0	0	0	1	1.06	2	2	1	0	0	0	0	1	1.89	2	2	1	0	0	0	0	1	2.01	2	2	1	0	0	0	0	1	1.29	2
1	67	4	2	161	65	25.0762	2008-04	5	3	-2	4	6	0	1	1	0	0	0	0	1	3.16	2	2	1	0	0	0	0	1	1.07	2	2	1	0	0	0	0	1	1.59	2	2	1	0	0	0	0	1	2.26	2
0	78	6	2	150	45	20	2008-04	2	3	1	3	5	0	1	1	0	0	0	0	1	1.06	4		0	0	0	0	0			4		0	0	0	0	0			4		0	0	0	0	0			4
1	81	6	2	169	60	21.0077	2008-04	0	0	0	4	5	0	1	1	0	0	0	0	1	2.66	4		0	0	0	0	0			3	2	1	0	0	0	0	1	2.75	4		0	0	0	0	0			4
1	70	5	2	164	74	27.5134	2008-04	3	3	0	3	4	0	1	1	0	0	0	0	1	1.13	2	2	1	0	0	0	0	1	2.92	2	2	1	0	0	0	0	1	2.77	2	2	1	0	0	0	0	1	3.09	2
0	73	5	2	156	68	27.9421	2008-04	3	2	-1	3	5	0	1	1	0	0	0	0	1	2.5	2	2	1	0	0	0	0	1	2.94	2	2	1	0	0	0	0	1	1.37	2	2	1	0	0	0	0	1	1.26	2
1	82	6	2	155	52	21.6441	2008-04	15	15	0	4	5	0	1	1	0	0	0	0	1	1.48	4		0	0	0	0	0			4		0	0	0	0	0			4		0	0	0	0	0			4
0	82	6	2	148	53	24.1965	2008-03	1	1	0	5	7	0	1	1	0	0	0	0	1	2.51	2	2	1	0	0	0	0	1	1.22	2	2	1	0	0	0	0	1	1.16	2	2	1	0	0	0	0	1	1.87	2
0	76	6	2	160	67	26.1719	2008-11	18	18	0	4	6	0	1	1	0	0	0	0	1	1.45	2	2	1	0	0	0	0	1	1.98	2	2	1	0	0	0	0	1	2.43	2	2	1	0	0	0	0	1	1.68	4
1	69	4	2	167	80	28.6851	2008-03	6	6	0	2	3	0	1	1	0	0	0	0	1	2.29	4		0	0	0	0	0			4		0	0	0	0	0			2	2	1	0	0	0	0	1	0.98	2
1	66	4	2	170	62	21.4533	2008-03	6	6	0	2	3	0	1	1	0	0	0	0	1	0.93	4		0	0	0	0	0			2	2	1	0	0	0	0	2		4		0	0	0	0	0			4
1	58	2	1	170	60	20.7612	2008-03	9	8	-1	4	4	0	1	1	0	0	0	0	1	2.5	4		0	0	0	0	0			4		0	0	0	0	0			4		0	0	0	0	0			4
0	76	6	2	157	53	21.5019	2008-04	5	7	2	4	6	0	1	0	1	0	0	1	1	1.11	2	2	0	1	0	0	0	1	2.36	2	2	0	1	0	0	1	1	1.4	2	2	0	1	0	0	1	1	1.07	4
0	63	3	1	155	43	17.898	2008-03	13	3	-10	3	5	0	1	1	0	0	0	0	1	1.76	2	2	1	0	0	0	0	1	1.86	2	2	1	0	0	0	0	1	1.86	2	2	1	0	0	0	0	1	1.85	2
0	72	5	2	152	49	21.2084	2008-03	0	0	0	3	5	0	1	1	0	0	0	0	1	2.14	2	2	1	0	0	0	0	1	2.03	2	2	1	0	0	0	0	1	1.4	3	2	1	0	0	0	0	1	1.08	2
1	69	4	2	168	62	21.9671	2008-03	19	13	-6	3	4	0	1	1	0	0	0	0	1	2.01	4		0	0	0	0	0			4		0	0	0	0	0			4		0	0	0	0	0			4
1	54	1	1	172	69	23.3234	2008-02	4	1	-3	2	2	0	1	1	0	0	0	0	1	1.9	2	2	1	0	0	0	0	1	2.15	2	2	1	0	0	0	0	1	2.91	2	2	1	0	0	0	0	1	2.49	2
1	52	1	1	168	85	30.1162	2008-02	12	5	-7	2	2	0	1	1	0	0	0	0	1	1.78	2	2	1	0	0	0	0	1	1.4	2	2	1	0	0	0	0	1	1.63	2	2	1	0	0	0	0	1	1.68	2
0	81	6	2	152	60	25.9695	2008-02	17	7	-10	5	7	0	1	0	1	1	0	0	2		4		0	0	0	0	0			4		0	0	0	0	0			4		0	0	0	0	0			4
1	63	3	1	163	99999		2008-11	15	5	-10	2	2	0	1	1	0	0	0	0	1	1.59	4		0	0	0	0	0			4		0	0	0	0	0			4		0	0	0	0	0			2
0	37	1	1	155	47	19.563	2008-02	13	11	-2	2	4	0	1	1	0	0	0	0	1	1.12	2	2	1	0	0	0	0	1	2.15	2	2	1	0	0	0	0	1	2.45	2	2	1	0	0	0	0	1	2.79	2
0	82	6	2	140	33	16.8367	2008-02	4	4	0	3	5	0	1	1	0	0	0	0	1	2.11	2	2	1	0	0	0	0	1	1.99	4		0	0	0	0	0			2	2	1	0	0	0	0	1	1.67	2
0	65	4	2	151	52	22.806	2008-01	1	0	-1	4	6	0	1	1	0	0	0	0	1	1	2	3	0	1	0	0	0	2		4		0	0	0	0	0			4		0	0	0	0	0			4
0	73	5	2	155	53	22.0604	2008-01	14	9	-5	3	5	0	1	1	0	0	0	0	1	2.5	4		0	0	0	0	0			4		0	0	0	0	0			4		0	0	0	0	0			4
1	64	3	1	165	60	22.0386	2008-01	16	17	1	3	3	0	1	1	0	0	0	0	1	1.33	2	2	1	0	0	0	0	1	1.35	4		0	0	0	0	0			4		0	0	0	0	0			4
0	68	4	2	165	65	23.8751	2008-01	9	5	-4	3	5	0	1	1	0	0	0	0	1	2.06	2	2	1	0	0	0	0	2		4		0	0	0	0	0			2	2	1	0	0	0	0	2		2
1	74	5	2	173	80	26.7299	2008-01	13	9	-4	3	5	0	1	1	0	0	0	0	1	1.4	2	3	0	1	1	0	0	2		2	2	0	1	1	0	0	2		4		0	0	0	0	0			4
1	86	6	2	172	50	16.901	2008-01	15	15	0	4	5	0	1	1	0	0	0	0	1	2.88	3	4	0	0	0	0	0	1	2.54	4		0	0	0	0	0			4		0	0	0	0	0			4
0	54	1	1	160	50	19.5312	2008-01	7	3	-4	3	4	0	1	0	1	1	0	0	1	2.5	2	3	1	0	0	0	0	1	1.26	2	2	1	0	0	0	0	1	1.24	2	2	1	0	0	0	0	1	1.16	2
0	54	1	1	156	56	23.0112	2008-01	7	3	-4	4	6	0	2	0	0	0	0	0	1	1.17	3	4	0	0	0	0	0	2				0	0	0	0	0					0	0	0	0	0
1	52	1	1	166	64	23.2254	2008-11	18	18	0	2	2	0	1	1	0	0	0	0	2		4		0	0	0	0	0			4		0	0	0	0	0			4		0	0	0	0	0			4
0	69	4	2	152	38	16.4474	2007-12	11	12	1	2	5	0	1	1	0	0	0	0	1	3.1	2	2	1	0	0	0	0	1	3.61	4		0	0	0	0	0			2	3	0	1	0	1	0	2		2
1	65	4	2	175	60	19.5918	2007-12	18	18	0	3	4	0	1	0	1	1	0	0	1	1.21	2	2	0	1	1	0	0	2		2	2	0	1	1	0	0	2		2	2	0	1	1	0	0	2		2
0	58	2	1	155	57	23.7253	2007-12	8	8	0	3	5	0	1	1	0	0	0	0	1	2.16	2	2	1	0	0	0	0	1	1.31	2	2	1	0	0	0	0	1	5.01	3	4	0	0	0	0	0	1	3.68
1	50	1	1	170	88	30.4498	2007-12	3	1	-2	2	2	0	1	1	0	0	0	0	1	1.19	2	2	1	0	0	0	0	1	1.63	4		0	0	0	0	0			4		0	0	0	0	0			4
1	56	2	1	175	80	26.1224	2007-12	4	2	-2	4	4	0	1	1	0	0	0	0	1	1.91	2	2	1	0	0	0	0	1	1.06	2	2	1	0	0	0	0	1	1.07	2	2	1	0	0	0	0	1	1.12	2
1	63	3	1	174	72	23.7812	2007-12	2	0	-2	2	3	0	1	1	0	0	0	0	1	2.14	2	2	1	0	0	0	0	1	2	4		0	0	0	0	0			4		0	0	0	0	0			4
1	64	3	1	172	81	27.3797	2007-12	3	2	-1	4	4	0	1	1	0	0	0	0	1	0.95	2	2	1	0	0	0	0	1	1.34	2	2	1	0	0	0	0	1	1.34	2	2	1	0	0	0	0	1	1.42	2
1	77	6	2	162	63	24.0055	2007-12	4	12	8	5	6	0	1	1	0	0	0	0	1	2.15	2	2	1	0	0	0	0	1	2.37	4		0	0	0	0	0			4		0	0	0	0	0			4
0	64	3	1	163	55	20.7008	2007-12	8	0	-8	2	3	0	1	1	0	0	0	0	1	2.51	2	2	1	0	0	0	0	1	2.39	2	2	1	0	0	0	0	1	1.07	2	2	1	0	0	0	0	1	1.38	2
1	68	4	2	170	68	23.5294	2007-12	19	33	14	4	5	0	2	0	0	0	0	0	1	0.98	4		0	0	0	0	0			4		0	0	0	0	0			4		0	0	0	0	0			4
0	72	5	2	156	71.15	29.2365	2008-12	3	99		3	5	0	1	1	1	1	0	0	1	1.02	2	2	1	1	1	0	0	1	2.27	2	2	1	1	1	0	0	1	2.66	2	2	1	1	1	0	0	1	2.39	2
0	72	5	2	99999	99999		2008-08	99	99		3	5	0	2	0	0	0	0	0	1	1.74	4		0	0	0	0	0			4		0	0	0	0	0			4		0	0	0	0	0			4
0	87	6	2	99999	99999		2005-09	99	99		4	6	0	1	0	1	0	0	1	1	1.06	4		0	0	0	0	0			4		0	0	0	0	0			4		0	0	0	0	0			4
0	83	6	2	99999	99999		2005-09	99	99		4	6	0	1	1	0	0	0	0	1	3.19	2	2	1	0	0	0	0	1	2.81	3	2	1	0	0	0	0	1	3.08	3	2	1	0	0	0	0	1	2.36	2
0	73	5	2	99999	99999		2005-08	99	99		3	5	0	1	0	1	1	0	0	1	1.02	3	3	1	0	0	0	0	1	1.59	2	2	1	0	0	0	0	1	2.35	2	2	1	0	0	0	0	1	3.09	2
0	78	6	2	99999	99999		2005-08	99	99		4	6	0	1	0	1	0	0	1	1	1.3	4		0	0	0	0	0			4		0	0	0	0	0			4		0	0	0	0	0			4
1	70	5	2	168	58	20.5499	2005-08	99	99		2	3	0	1	1	0	0	0	0	1	2.08	2	2	1	0	0	0	0	1	2.57	3	2	1	0	0	0	0	1	1.73	2	2	1	0	0	0	0	1	1.89	2
0	82	6	2	99999	99999		2005-07	99	99		3	6	0	1	0	1	0	0	1	1	1.02	4		0	0	0	0	0			4		0	0	0	0	0			4		0	0	0	0	0			4
0	84	6	2	99999	99999		2005-07	99	99		3	5	0	1	0	1	0	0	1	1	1.03	3	4	0	0	0	0	0	1	1.34			0	0	0	0	0					0	0	0	0	0
1	72	5	2	159	56	22.151	2005-07	9	99		2	3	0	1	0	1	0	1	0	1	0.93	2	2	0	1	0	1	0	2		3	3	1	0	0	0	0	1	1.65	2	2	1	0	0	0	0	1	3.1	2
1	71	5	2	165	57	20.9366	2005-06	99	99		4	5	0	1	1	0	0	0	0	1	1.8	2	3	0	1	1	0	0	1	1.1	2	3	1	1	1	0	0	1	1.08	3	3	1	0	0	0	0	1	9999	2
1	63	3	1	99999	99999		2005-05	99	99		3	3	0	1	1	0	0	0	0	1	2.07	4		0	0	0	0	0			4		0	0	0	0	0			4		0	0	0	0	0			4
1	54	1	1	99999	99999		2008-08	0	99		3	3	0	1	1	0	0	0	0	1	2.17	4		0	0	0	0	0			4		0	0	0	0	0			4		0	0	0	0	0			4
0	69	4	2	150	57	25.3333	2005-05	99	99		3	5	0	1	1	0	0	0	0	1	4.47	2	2	1	0	0	0	0	1	2.78	2	2	1	0	0	0	0	1	2.2	2	2	1	0	0	0	0	1	2.02	2
1	58	2	1	164.3	83.3	30.8581	2005-05	99	99		3	3	0	1	1	0	0	0	0	1	2.25	2	2	1	0	0	0	0	1	1.28	2	3	0	1	0	0	1	1	1.48	3	3	1	0	0	0	0	1	1.52	2
1	55	2	1	99999	99999		2005-04	99	99		4	5	0	1	1	1	0	0	1	1	1.87	2	2	1	1	0	0	0	1	1.28	2	2	1	1	0	0	1	1	1.47	2	2	1	1	0	0	1	1	1.86	2
0	68	4	2	99999	99999		2005-04	99	99		2	4	0	1	1	0	0	0	0	1	2.54	2	2	1	0	0	0	0	2		2	2	1	0	0	0	0	1	1.53	2	2	1	0	0	0	0	1	1.24	2
0	79	6	2	99999	99999		2005-03	99	99		5	7	0	1	1	1	0	0	1	1	2.18	2	2	1	1	0	0	0	1	1.32	3	2	1	1	0	0	1	1	2.94	2	2	1	1	0	0	1	1	3.06	2
0	67	4	2	99999	99999		2005-03	99	99		2	4	0	1	1	1	0	0	1	1	1.67	4		0	0	0	0	0			4		0	0	0	0	0			4		0	0	0	0	0			4
1	48	1	1	99999	99999		2005-03	99	99		2	3	0	1	1	0	0	0	0	1	2.33	2	2	1	0	0	0	0	1	2.06	2	2	1	0	0	0	0	1	2.19	2	2	1	0	0	0	0	1	1.83	4
1	75	6	2	99999	99999		2005-02	99	99		3	4	0	1	1	0	0	0	0	1	1.26	2	2	1	0	0	0	0	1	2.31	4		0	0	0	0	0			4		0	0	0	0	0			4
1	61	3	1	99999	99999		2005-02	99	99		2	2	0	1	0	1	0	0	1	1	1.02	4		0	0	0	0	0			4		0	0	0	0	0			4		0	0	0	0	0			4
1	76	6	2	99999	99999		2005-02	99	99		4	5	0	1	1	0	0	0	0	1	2.77	2	2	1	0	0	0	0	1	2.03	2	2	1	0	0	0	0	1	1.7	3	3	0	1	0	0	1	1	1.13	2
0	78	6	2	99999	99999		2008-08	5	0	-5	4	6	0	1	1	0	0	0	0	1	1.73	2	2	1	0	0	0	0	1	2.15	2	2	1	0	0	0	0	1	2.27	2	2	1	0	0	0	0	1	2.34	2
1	58	2	1	99999	99999		2005-01	99	99		2	2	0	1	1	0	0	0	0	1	2.73	2	2	1	0	0	0	0	1	3.01	2	2	1	0	0	0	0	1	1.6	2	2	1	0	0	0	0	1	2.8	2
0	79	6	2	99999	99999		2004-12	99	99		4	6	0	1	0	1	1	1	0	1	0.98	2	2	0	1	1	1	0	2		4		0	0	0	0	0			2	2	0	1	1	1	0	2		2
1	69	4	2	99999	99999		2004-11	99	99		4	6	0	1	1	0	0	0	0	1	1.21	4		0	0	0	0	0			4		0	0	0	0	0			4		0	0	0	0	0			4
1	81	6	2	99999	99999		2004-11	99	99		3	4	0	1	1	0	0	0	0	1	3.09	4		0	0	0	0	0			2	3	1	1	0	0	1	1	2.33	2	2	1	1	0	0	1	1	2.45	2
1	74	5	2	99999	99999		2004-11	99	99		2	3	0	1	0	1	1	0	1	1	1.27	2	2	0	1	1	0	0	2		2	2	0	1	1	0	1	2		4		0	0	0	0	0			4
1	85	6	2	99999	99999		2004-11	99	99		4	5	0	1	1	0	0	0	0	1	2.16	2	2	1	0	0	0	0	1	1.53	2	2	1	0	0	0	0	1	2.37	2	2	1	0	0	0	0	1	3.41	2
0	85	6	2	99999	99999		2004-10	99	99		4	6	0	1	0	1	0	0	1	1	0.93	4		0	0	0	0	0			2	2	0	1	0	0	1	2		2	2	0	1	0	0	1	2		3
1	59	2	1	156.1	63.8	26.1827	2004-10	2	99		2	2	0	1	0	1	1	1	0	1	0.91	2	2	0	1	1	1	0	2		4		0	0	0	0	0			2	2	0	1	1	1	0	2		2
1	83	6	2	99999	99999		2004-09	99	99		4	5	0	1	0	1	1	0	0	1	1.16	2	2	0	1	1	0	0	2		2	2	0	1	1	0	0	2		2	2	0	1	1	0	0	2		2
0	74	5	2	99999	99999		2004-07	99	99		2	4	0	1	0	1	0	0	1	1	0.94	4		0	0	0	0	0			2	2	0	1	0	0	1	2		2	2	0	1	0	0	1	2		4
0	76	6	2	99999	99999		2008-07	1	1	0	5	7	0	1	1	0	0	0	0	1	1.8	2	2	1	0	0	0	0	1	2.94	2	2	1	0	0	0	0	1	3.44	2	2	1	0	0	0	0	1	1.95	2
1	84	6	2	99999	99999		2004-06	99	99		4	5	0	1	0	1	0	0	1	1	0.93	3	2	0	1	0	0	0	1	0.93	2	2	0	1	0	0	1	2		3	2	0	1	0	0	1	1	1.35	4
0	76	6	2	99999	99999		2004-06	99	99		4	6	0	1	0	1	0	0	1	1	1.24	4		0	0	0	0	0			4		0	0	0	0	0			4		0	0	0	0	0			4
0	85	6	2	99999	99999		2004-06	99	99		4	6	0	1	1	0	0	0	0	1	3.32	4		0	0	0	0	0			4		0	0	0	0	0			4		0	0	0	0	0			4
1	81	6	2	99999	99999		2004-06	99	99		3	4	0	1	1	0	0	0	0	1	2.33	2	2	1	0	0	0	0	1	2.54	4		0	0	0	0	0			2	2	1	0	0	0	0	1	2.12	2
1	78	6	2	99999	99999		2004-06	99	99		5	6	0	1	0	1	0	0	1	1	1.01	4		0	0	0	0	0			4		0	0	0	0	0			4		0	0	0	0	0			2
1	68	4	2	99999	99999		2004-05	99	99		3	4	0	1	0	1	0	1	0	1	1.59	4		0	0	0	0	0			4		0	0	0	0	0			4		0	0	0	0	0			4
0	66	4	2	148	54	24.653	2004-05	99	99		3	5	0	1	1	0	0	0	0	1	1.83	2	2	1	0	0	0	0	1	2.05	2	2	1	0	0	0	0	1	1.67	2	2	1	0	0	0	0	1	2.31	2
1	61	3	1	99999	99999		2004-04	99	99		3	4	0	1	0	1	0	0	1	1	1.78	4		0	0	0	0	0			4		0	0	0	0	0			4		0	0	0	0	0			4
0	66	4	2	147	48	22.213	2004-01	99	99		2	4	1	1	1	0	0	0	0	1	2.77	2	2	1	0	0	0	0	1	2.32	3	2	1	0	0	0	0	1	1.51	2	2	1	0	0	0	0	1	1.4	2
0	80	6	2	99999	99999		2004-01	99	99		4	6	0	1	1	0	0	0	0	1	1.9	2	2	1	0	0	0	0	1	2.11	2	2	1	0	0	0	0	1	2.2	2	2	1	0	0	0	0	1	1.92	2
1	63	3	1	99999	99999		2008-07	5	0	-5	2	3	0	1	1	1	1	1	0	1	1.95	2	3	1	0	0	0	0	1	1.41	2	2	1	0	0	0	0	1	2.31	4		0	0	0	0	0			4
1	65	4	2	165	64.5	23.6915	2004-01	99	99		4	5	0	1	1	0	0	0	0	1	2.37	2	2	1	0	0	0	0	1	2.58	4		0	0	0	0	0			2	3	1	1	0	0	1	1	2.81	2
1	49	1	1	99999	99999		2004-01	99	99		2	3	0	1	1	0	0	0	0	1	2.09	2	2	1	0	0	0	0	1	3.34	2	2	1	0	0	0	0	1	1.1	2	2	1	0	0	0	0	1	2.83	2
1	83	6	2	99999	99999		2004-01	99	99		4	5	0	1	1	0	0	0	0	1	2.63	2	2	1	0	0	0	0	1	3.01	2	2	1	0	0	0	0	1	1.19	2	2	1	0	0	0	0	1	3.02	2
1	78	6	2	99999	99999		2003-12	99	99		4	5	0	1	1	0	0	0	0	1	1.89	4		0	0	0	0	0			2	2	1	0	0	0	0	1	1.12	2	3	0	1	0	0	1	1	1.43	4
1	57	2	1	170	71	24.5675	2003-12	99	99		3	3	0	1	1	0	0	0	0	1	2.99	2	2	1	0	0	0	0	1	1.96	2	2	1	0	0	0	0	1	1.85	2	2	1	0	0	0	0	1	2.58	2
0	57	2	1	148	58	26.4792	2003-10	99	99		5	6	0	1	1	0	0	0	0	1	1.72	2	2	1	0	0	0	0	1	1.48	2	2	1	0	0	0	0	1	1.17	2	2	1	0	0	0	0	1	1.87	2
0	78	6	2	99999	99999		2003-10	99	99		4	6	0	1	1	0	0	0	0	1	3.86	2	2	1	0	0	0	0	1	2.05	2	2	1	0	0	0	0	1	2.1	2	2	1	0	0	0	0	1	1.8	2
1	48	1	1	99999	99999		2003-09	99	99		3	3	0	1	0	1	1	0	0	2		2	2	0	1	1	0	0	2		3	3	1	0	0	0	0	1	3.73	2	2	1	0	0	0	0	1	1.82	2
0	62	3	1	99999	99999		2003-06	99	99		3	4	0	1	1	0	0	0	0	1	2.33	2	2	1	0	0	0	0	1	2.41	2	2	1	0	0	0	0	1	2.41	2	2	1	0	0	0	0	1	2.34	2
1	72	5	2	99999	99999		2003-05	99	99		3	4	0	1	1	0	0	0	0	1	2.84	2	2	1	0	0	0	0	1	2.52	2	2	1	0	0	0	0	1	2.33	2	2	1	0	0	0	0	1	1.9	2
0	95	6	2	99999	99999		2008-06	21	23	2	4	7	0	1	0	1	0	0	1	1	0.98	4		0	0	0	0	0			4		0	0	0	0	0			4		0	0	0	0	0			4
0	80	6	2	99999	99999		2003-04	99	99		5	7	0	1	0	1	0	0	1	2		2	2	0	1	0	0	0	2		2	2	0	1	0	0	1	2		2	2	0	1	0	0	1	2		2
0	82	6	2	99999	50		2008-05	24	99		4	6	0	1	1	0	0	0	0	1	2.56	2	2	1	0	0	0	0	1	1.58	2	2	1	0	0	0	0	2		2	2	1	0	0	0	0	1	2.16	2
1	72	5	2	99999	99999		2008-06	3	1	-2	2	3	0	1	1	0	0	0	0	1	2.01	2	2	1	0	0	0	0	1	1.26	2	2	1	0	0	0	0	1	2.99	2	2	1	0	0	0	0	1	2.21	2
1	79	6	2	99999	99999		2008-05	3	1	-2	3	4	0	1	1	0	0	0	0	1	2.62	2	2	1	0	0	0	0	1	2.52	2	2	1	0	0	0	0	1	1.91	2	2	1	0	0	0	0	1	2.49	3
0	73	5	2	99999	99999		2008-03	14	7	-7	2	4	0	1	1	0	0	0	0	1	1.47	4		0	0	0	0	0			4		0	0	0	0	0			4		0	0	0	0	0			4
0	69	4	2	162	57	21.7192	2008-12	99	99		3	5	0	1	1	0	0	0	0	1	2.73	2	2	1	0	0	0	0	1	2.32	2	2	1	0	0	0	0	1	1.93	2	2	1	0	0	0	0	1	1.59	2
1	83	6	2	99999	99999		2008-04	4	2	-2	4	5	0	1	0	1	1	0	0	2		2	3	1	0	0	0	0	2		4		0	0	0	0	0			4		0	0	0	0	0			4
0	79	6	2	99999	99999		2008-03	4	99		4	6	0	1	1	0	0	0	0	1	2.54	2	2	1	0	0	0	0	1	2.44	3	2	1	0	0	0	0	1	3.28	3	2	1	0	0	0	0	1	1.14	2
1	64	3	1	99999	99999		2008-03	1	1	0	2	2	0	1	1	1	0	0	1	1	0.96	2	2	1	1	0	0	0	1	3.08	4		0	0	0	0	0			2	2	1	1	0	0	1	1	1.98	4
1	82	6	2	99999	99999		2008-01	6	9	3	4	5	0	1	0	1	1	0	0	1	1.55	4		0	0	0	0	0			4		0	0	0	0	0			4		0	0	0	0	0			4
1	71	5	2	99999	99999		2008-01	6	99		4	5	0	1	0	1	1	0	0	1	0.99	4		0	0	0	0	0			4		0	0	0	0	0			4		0	0	0	0	0			4
1	82	6	2	99999	99999		2008-02	12	5	-7	4	5	0	1	1	1	1	0	0	2		4		0	0	0	0	0			4		0	0	0	0	0			4		0	0	0	0	0			4
1	87	6	2	99999	99999		2008-01	4	3	-1	4	5	0	1	0	1	1	0	0	1	1	4		0	0	0	0	0			2	2	0	1	1	0	0	2		2	2	0	1	1	0	0	2		2
1	87	6	2	99999	99999		2008-01	8	99		3	4	0	1	1	0	0	0	0	1	1.75	4		0	0	0	0	0			4		0	0	0	0	0			4		0	0	0	0	0			4
0	75	6	2	99999	99999		2007-12	12	9	-3	4	6	0	1	0	1	1	0	0	1	1.04	4		0	0	0	0	0			2	2	0	1	1	0	0	2		2	2	0	1	1	0	0	2		2
0	75	6	2	99999	99999		2007-12	8	99		4	6	0	1	1	0	0	0	0	1	2.01	3	4	0	0	0	0	0	2				0	0	0	0	0					0	0	0	0	0
0	98	6	2	162	65.75	25.0533	2008-12	4	1	-3	5	7	0	1	0	1	0	0	1	1	2.44	2	2	0	1	0	0	0	1	3.38	4		0	0	0	0	0			4		0	0	0	0	0			4
1	47	1	1	99999	99999		2007-12	99	99		2	2	0	1	1	1	1	0	0	1	1.04	2	3	1	0	0	0	0	1	2.81	2	2	1	0	0	0	0	1	2.75	2	2	1	0	0	0	0	1	1.85	2
1	74	5	2	99999	99999		2007-12	6	99		4	5	0	1	1	1	1	0	0	1	2.01	3	2	1	1	1	0	0	1	1.87	2	3	1	0	0	0	0	1	3.76	2	2	1	0	0	0	0	1	2.21	2
1	65	4	2	99999	99999		2007-11	7	7	0	2	4	0	1	1	1	1	0	0	1	2.51	4		0	0	0	0	0			4		0	0	0	0	0			4		0	0	0	0	0			4
1	76	6	2	99999	99999		2007-11	99	99		3	4	0	1	1	0	0	0	0	1	2.48	2	2	1	0	0	0	0	1	1.57	2	2	1	0	0	0	0	1	2.22	2	2	1	0	0	0	0	1	2.52	2
0	66	4	2	99999	99999		2007-11	13	1	-12	2	4	0	1	1	0	0	0	0	1	2.07	2	2	1	0	0	0	0	1	0.99	2	2	1	0	0	0	0	1	2.04	2	2	1	0	0	0	0	1	1.83	4
0	83	6	2	99999	99999		2007-11	0	99		4	6	0	1	1	0	0	0	0	1	2.65	2	2	1	0	0	0	0	1	1.53	2	2	1	0	0	0	0	1	1.82	2	2	1	0	0	0	0	1	2.28	4
1	71	5	2	99999	99999		2007-10	99	99		4	5	0	1	1	0	0	0	0	1	2.66	4		0	0	0	0	0			3	2	1	0	0	0	0	1	0.98	4		0	0	0	0	0			4
0	62	3	1	154.7	72.2	30.1687	2007-10	3	99		5	7	0	1	1	1	1	0	0	1	1.74	2	2	1	1	1	0	0	1	2.86	2	2	1	1	1	0	0	1	1.82	2	2	1	1	1	0	0	1	1.09	2
1	77	6	2	99999	99999		2007-10	18	99		3	4	0	1	0	1	0	0	1	1	1.1	2	3	1	1	0	0	0	2		2	2	1	1	0	0	1	1	1.02	2	2	1	1	0	0	1	1	1.53	4
1	69	4	2	99999	99999		2007-09	18	99		2	3	0	1	0	1	0	1	0	1	1.59	4		0	0	0	0	0			4		0	0	0	0	0			4		0	0	0	0	0			3
0	80	6	2	158	68	27.2392	2008-12	1	99		4	7	0	1	1	1	1	0	0	1	2.39	3	3	1	0	0	0	0	1	1.85	3	4	0	0	0	0	0	1	1.08	4		0	0	0	0	0			4
1	78	6	2	160	62	24.2188	2007-09	2	99		5	6	0	1	1	0	0	0	0	1	1.94	2	2	1	0	0	0	0	1	2.88	2	2	1	0	0	0	0	1	1.04	2	2	1	0	0	0	0	1	1.31	2
1	67	4	2	164	65	24.1672	2007-10	99	99		4	5	0	1	1	0	0	0	0	1	2.15	2	2	1	0	0	0	0	1	2.38	2	2	1	0	0	0	0	1	2.01	2	2	1	0	0	0	0	1	2.16	3
0	70	5	2	99999	99999		2007-09	99	99		3	5	0	1	1	0	0	0	0	1	2.21	2	2	1	0	0	0	0	1	1.51	2	2	1	0	0	0	0	1	1.69	2	2	1	0	0	0	0	1	2.34	2
1	79	6	2	99999	99999		2007-09	99	99		3	4	0	1	0	1	1	0	0	1	1.02	2	3	1	0	0	0	0	1	3.46	2	2	1	0	0	0	0	1	1.43	2	2	1	0	0	0	0	1	2.22	2
0	73	5	2	99999	99999		2007-09	3	99		2	4	0	1	1	0	0	0	0	1	1.77	2	2	1	0	0	0	0	1	2.86	4		0	0	0	0	0			2	2	1	0	0	0	0	1	2.09	2
1	84	6	2	99999	99999		2007-09	11	99		4	5	0	1	1	0	0	0	0	1	3.41	4		0	0	0	0	0			4		0	0	0	0	0			4		0	0	0	0	0			4
0	82	6	2	99999	99999		2007-08	6	3	-3	4	6	0	1	1	0	0	0	0	1	2.66	2	2	1	0	0	0	0	1	2.01	4		0	0	0	0	0			2	2	1	0	0	0	0	1	1.43	2
1	85	6	2	99999	99999		2007-08	24	99		4	5	0	1	0	1	0	1	0	1	0.96	4		0	0	0	0	0			2	3	0	1	1	1	0	2		2	3	0	1	1	0	0	2		4
1	67	4	2	167	68	24.3824	2007-07	4	99		4	5	0	1	1	0	0	0	0	1	2.36	2	2	1	0	0	0	0	1	2.2	2	2	1	0	0	0	0	1	1.98	2	2	1	0	0	0	0	1	2.62	2
1	66	4	2	99999	99999		2007-06	5	1	-4	3	4	0	1	0	1	1	0	0	1	1.13	2	3	1	0	0	0	0	1	2.42	2	2	1	0	0	0	0	1	2.52	2	2	1	0	0	0	0	1	2.33	2
0	82	6	2	99999	99999		2008-11	10	99		5	7	0	1	0	1	1	1	0	1	1.12	4		0	0	0	0	0			4		0	0	0	0	0			4		0	0	0	0	0			4
1	81	6	2	160	53	20.7031	2007-05	5	3	-2	3	4	0	1	1	0	0	0	0	1	2.8	2	2	1	0	0	0	0	1	3.09	2	2	1	0	0	0	0	1	1.4	2	2	1	0	0	0	0	1	1.45	2
0	81	6	2	150	60	26.6667	2007-05	99	99		4	6	0	1	0	1	1	0	0	1	1.04	2	3	0	1	0	0	0	2		2	2	0	1	0	0	1	2		2	2	0	1	0	0	1	2		2
1	52	1	1	162	62	23.6244	2007-05	99	99		2	2	0	1	1	0	0	0	0	1	3.57	2	2	1	0	0	0	0	1	1.6	2	2	1	0	0	0	0	1	3.55	2	2	1	0	0	0	0	1	3.48	2
1	59	2	1	99999	63		2007-04	6	99		4	4	0	1	0	1	1	1	0	1	1.02	3	3	1	0	0	0	0	1	1.75	2	2	1	0	0	0	0	1	2	2	2	1	0	0	0	0	1	1.53	4
1	66	4	2	99999	99999		2007-04	99	99		4	5	0	1	1	0	0	0	0	1	2.41	2	2	1	0	0	0	0	1	2.82	2	2	1	0	0	0	0	1	3.06	2	2	1	0	0	0	0	1	3.28	2
1	84	6	2	99999	99999		2007-03	99	99		4	6	0	1	1	0	0	0	0	1	1.26	2	2	1	0	0	0	0	1	2.68	2	2	1	0	0	0	0	1	3.92	2	2	1	0	0	0	0	1	4.55	2
0	64	3	1	162.1	72.3	27.5152	2007-03	99	99		4	6	0	1	1	0	0	0	0	1	2.74	2	2	1	0	0	0	0	1	1.63	2	2	1	0	0	0	0	1	2.54	2	2	1	0	0	0	0	1	2.94	2
1	84	6	2	99999	99999		2007-02	99	99		5	6	0	1	1	0	0	0	0	1	1.95	2	2	1	0	0	0	0	1	1.43	2	2	1	0	0	0	0	1	2.14	2	2	1	0	0	0	0	1	1.7	2
1	70	5	2	99999	99999		2006-12	99	99		3	4	0	1	1	0	0	0	0	1	1.44	4		0	0	0	0	0			4		0	0	0	0	0			4		0	0	0	0	0			4
0	70	5	2	151.8	68.2	29.5965	2007-01	99	99		4	6	0	1	1	1	0	1	0	1	2	2	2	1	1	0	1	0	1	2.72	2	2	1	1	0	1	0	1	1.97	2	2	1	1	0	1	0	1	2.19	2
0	83	6	2	99999	99999		2008-11	2	99		3	5	0	1	0	1	1	1	0	1	1.54	2	3	0	1	0	1	0	2		4		0	0	0	0	0			4		0	0	0	0	0			4
0	74	5	2	99999	99999		2006-12	99	99		3	5	0	1	1	0	0	0	0	1	2.31	2	2	1	0	0	0	0	1	1.35	2	2	1	0	0	0	0	1	3.45	2	2	1	0	0	0	0	1	1.93	2
1	64	3	1	99999	99999		2006-12	99	99		3	3	0	1	1	0	0	0	0	1	2.56	2	2	1	0	0	0	0	1	2.49	2	2	1	0	0	0	0	1	3.13	2	2	1	0	0	0	0	1	2.12	2
0	80	6	2	156	60	24.6548	2006-12	99	99		5	7	0	1	0	1	1	1	0	1	1.08	4		0	0	0	0	0			4		0	0	0	0	0			4		0	0	0	0	0			3
1	78	6	2	160	42.7	16.6797	2006-12	99	99		3	4	0	1	1	0	0	0	0	1	3.29	2	2	1	0	0	0	0	1	1.4	2	2	1	0	0	0	0	1	1.93	2	2	1	0	0	0	0	1	2.24	2
0	78	6	2	99999	99999		2006-11	99	99		5	8	0	1	1	0	0	0	0	1	4.09	2	2	1	0	0	0	0	1	1.12	2	2	1	0	0	0	0	2		2	2	1	0	0	0	0	1	1.71	2
1	58	2	1	184	85	25.1063	2006-11	99	99		3	3	0	1	1	0	0	0	0	1	1.78	2	2	1	0	0	0	0	1	2.03	2	2	1	0	0	0	0	1	1.91	2	2	1	0	0	0	0	1	1.82	4
1	71	5	2	99999	99999		2006-11	99	99		4	5	0	1	0	1	0	0	1	1	0.98	4		0	0	0	0	0			3	2	0	1	0	0	1	1	1.09	2	2	0	1	0	0	1	2		2
1	60	3	1	165	67	24.6097	2006-11	99	99		4	4	0	1	1	0	0	0	0	1	2.29	2	2	1	0	0	0	0	1	1.69	2	2	1	0	0	0	0	1	3.03	4		0	0	0	0	0			2
1	65	4	2	165	53	19.4674	2006-11	99	99		2	4	0	1	1	0	0	0	0	1	2.79	2	2	1	0	0	0	0	1	3.63	2	2	1	0	0	0	0	1	2.53	2	2	1	0	0	0	0	1	2.67	2
0	84	6	2	99999	99999		2006-10	99	99		5	7	0	1	1	1	0	0	1	1	2.19	4		0	0	0	0	0			4		0	0	0	0	0			4		0	0	0	0	0			4
1	66	4	2	166	76	27.5802	2008-11	1	99		4	6	0	1	1	1	1	0	1	1	1.4	2	3	1	1	1	0	0	1	2.72	2	2	1	1	1	0	0	1	2.34	2	2	1	1	1	0	0	1	1.97	2
1	78	6	2	99999	99999		2006-09	99	99		4	5	0	1	1	0	0	0	0	1	2.3	4		0	0	0	0	0			4		0	0	0	0	0			4		0	0	0	0	0			4
1	63	3	1	99999	99999		2006-09	99	99		3	3	0	1	1	1	1	0	0	1	1.27	2	3	1	0	0	0	0	1	4.18	2	2	1	0	0	0	0	1	4.19	2	2	1	0	0	0	0	1	4.01	2
1	67	4	2	161	53	20.4467	2006-09	15	99		2	4	0	1	1	0	0	0	0	1	1.49	2	2	1	0	0	0	0	1	2.58	2	2	1	0	0	0	0	1	1.12	2	2	1	0	0	0	0	1	2.11	2
1	77	6	2	99999	99999		2006-08	99	99		4	5	0	1	1	0	0	0	0	1	2.38	4		0	0	0	0	0			4		0	0	0	0	0			4		0	0	0	0	0			4
1	96	6	2	99999	99999		2006-08	99	99		3	5	0	1	1	0	0	0	0	1	5.29	4		0	0	0	0	0			4		0	0	0	0	0			4		0	0	0	0	0			4
0	66	4	2	99999	99999		2006-08	99	99		3	5	0	1	0	1	0	0	1	1	0.96	4		0	0	0	0	0			4		0	0	0	0	0			4		0	0	0	0	0			4
1	68	4	2	99999	99999		2006-07	99	99		4	5	0	1	1	1	0	0	1	1	1.07	2	2	1	1	0	0	0	1	1.54	2	2	1	1	0	0	1	1	1.38	2	2	1	1	0	0	1	1	1.99	2
0	69	4	2	163	73	27.4756	2006-06	14	99		3	5	0	1	0	1	1	0	0	1	1.09	4		0	0	0	0	0			3	2	0	1	1	0	0	1	1.04	2	3	0	1	0	0	1	2		4
0	74	5	2	160	68	26.5625	2006-06	99	99		3	6	0	1	0	1	1	1	0	1	0.97	3	2	0	1	1	1	0	1	0.98	2	2	0	1	1	1	0	2		2	2	0	1	1	1	0	2		2
1	73	5	2	99999	99999		2006-04	17	99		4	5	0	1	1	0	0	0	0	1	1.96	4		0	0	0	0	0			4		0	0	0	0	0			4		0	0	0	0	0			4
0	82	6	2	99999	99999		2008-11	14	99		4	6	0	2	0	0	0	0	0	1	1.33	4		0	0	0	0	0			4		0	0	0	0	0			4		0	0	0	0	0			4
0	86	6	2	99999	99999		2006-04	99	99		3	5	0	1	1	0	0	0	0	1	3.18	2	2	1	0	0	0	0	1	3.36	2	2	1	0	0	0	0	1	2.7	2	2	1	0	0	0	0	1	2.73	2
1	64	3	1	99999	99999		2006-03	99	99		3	3	0	1	1	1	0	0	1	1	2.83	4		0	0	0	0	0			4		0	0	0	0	0			4		0	0	0	0	0			4
0	80	6	2	99999	99999		2006-03	99	99		3	5	0	1	0	1	1	0	1	1	0.96	2	3	0	1	1	0	0	2		2	2	0	1	1	0	0	2		3	2	0	1	1	0	0	1	0.88	4
0	85	6	2	99999	99999		2006-03	99	99		5	7	0	1	1	0	0	0	0	1	4.1	2	2	1	0	0	0	0	1	1.99	2	2	1	0	0	0	0	1	1.78	2	2	1	0	0	0	0	1	1.65	2
1	68	4	2	99999	99999		2006-03	99	99		2	3	0	1	1	0	0	0	0	1	3.04	2	3	0	1	0	0	0	2		2	2	0	1	0	0	1	2		2	3	1	0	0	0	0	1	1.03	2
0	74	5	2	99999	99999		2006-02	99	99		4	6	0	1	1	0	0	0	0	1	2.31	4		0	0	0	0	0			4		0	0	0	0	0			4		0	0	0	0	0			4
0	74	5	2	99999	99999		2006-01	99	99		2	4	0	1	1	0	0	0	0	1	4.33	2	2	1	0	0	0	0	1	5	2	2	1	0	0	0	0	1	1.07	3	3	0	1	1	1	0	1	0.97	4
1	69	4	2	99999	99999		2006-01	99	99		2	3	0	1	0	1	1	0	0	1	1	4		0	0	0	0	0			4		0	0	0	0	0			3	3	0	1	0	0	1	1	1.03	4
0	72	5	2	154	49	20.6612	2006-01	99	99		3	5	0	1	1	0	0	0	0	1	1.81	2	2	1	0	0	0	0	1	2.92	2	2	1	0	0	0	0	1	2.97	2	2	1	0	0	0	0	1	2.9	2
0	77	6	2	148	43	19.6311	2006-01	99	99		4	7	0	1	0	1	0	0	1	1	3.02	2	3	1	0	0	0	0	1	3.48	2	2	1	0	0	0	0	1	1.73	2	2	1	0	0	0	0	1	2.05	2
0	81	6	2	99999	99999		2008-09	8	99		3	5	0	1	0	1	1	0	0	1	1.18	4		0	0	0	0	0			4		0	0	0	0	0			4		0	0	0	0	0			4
0	82	6	2	99999	99999		2005-12	99	99		4	6	0	1	0	1	1	0	0	1	1.16	4		0	0	0	0	0			4		0	0	0	0	0			4		0	0	0	0	0			4
0	81	6	2	99999	99999		2005-12	21	99		4	6	0	1	1	0	0	0	0	1	3.4	4		0	0	0	0	0			4		0	0	0	0	0			4		0	0	0	0	0			4
0	79	6	2	99999	99999		2005-11	99	99		4	7	0	1	1	0	0	0	0	1	3.21	2	2	1	0	0	0	0	1	9999	2	2	1	0	0	0	0	1	2.11	2	2	1	0	0	0	0	1	2.1	2
0	64	3	1	165	75	27.5482	2005-10	99	99		3	4	0	1	1	0	0	0	0	1	1.88	2	2	1	0	0	0	0	1	3.06	4		0	0	0	0	0			2	2	1	0	0	0	0	1	3.66	2
1	70	5	2	99999	99999		2005-10	99	99		3	4	0	1	1	0	0	0	0	1	2.5	2	2	1	0	0	0	0	1	1.48	2	2	1	0	0	0	0	1	1.94	2	2	1	0	0	0	0	1	1.75	4
0	74	5	2	149	47.5	21.3954	2005-10	99	99		2	4	0	1	1	0	0	0	0	1	1.97	2	2	1	0	0	0	0	1	1.29	2	3	1	1	0	0	1	1	2.15	2	2	1	1	0	0	1	1	2	2
1	73	5	2	99999	99999		2005-10	99	99		3	4	0	1	1	0	0	0	0	1	1.34	3	3	0	1	0	0	0	1	1.03	2	2	0	1	0	0	1	2		2	2	0	1	0	0	1	2		2
0	65	4	2	99999	99999		2005-10	8	99		4	6	0	1	0	1	0	0	1	1	0.95	3	3	1	0	0	0	0	1	2.17	2	2	1	0	0	0	0	2		2	2	1	0	0	0	0	2		4
0	79	6	2	99999	99999		2005-10	99	99		4	6	0	1	1	0	0	0	0	1	2.8	4		0	0	0	0	0			4		0	0	0	0	0			4		0	0	0	0	0			4
0	68	4	2	99999	99999		2005-10	99	99		4	6	0	1	0	1	0	0	1	1	0.96	4		0	0	0	0	0			4		0	0	0	0	0			4		0	0	0	0	0			4
0	79	6	2	146	43	20.1726	2008-12	2	1	-1	5	7	0	1	0	1	1	1	0	1	1	4		0	0	0	0	0			2	2	0	1	1	1	0	2		4		0	0	0	0	0			2
1	75	6	2	177	79.9	25.5035	2008-11	8	4	-4	5	6	0	1	1	0	0	0	0	1	2.25	3	2	1	0	0	0	0	1	2.93	2	2	1	0	0	0	0	1	2.81	2	2	1	0	0	0	0	2		4
0	66	4	2	99999	40.3		2006-07	99	99		2	4	0	1	1	0	0	0	0	1	2.52	2	2	1	0	0	0	0	1	1.96	2	2	1	0	0	0	0	1	2.4	2	2	1	0	0	0	0	1	3.54	4
1	68	4	2	160	50	19.5312	2006-07	99	99		3	4	0	1	1	1	1	0	0	1	2.29	2	2	1	1	1	0	0	1	1.22	4		0	0	0	0	0			2	2	1	1	1	0	0	1	1.11	2
0	62	3	1	99999	58.1		2006-06	13	1	-12	3	4	0	1	1	0	0	0	0	1	2.66	2	2	1	0	0	0	0	1	1.86	2	2	1	0	0	0	0	1	1.54	2	2	1	0	0	0	0	1	2.97	2
0	58	2	1	151	49.3	21.6219	2006-06	99	99		2	3	0	1	1	0	0	0	0	1	2.36	2	2	1	0	0	0	0	1	1.59	2	2	1	0	0	0	0	1	1.82	3	3	0	1	1	1	0	1	1.19	2
1	54	1	1	99999	99999		2006-06	99	99		4	4	0	1	1	0	0	0	0	1	1.83	2	2	1	0	0	0	0	1	1.88	2	2	1	0	0	0	0	1	2.86	2	2	1	0	0	0	0	1	2.38	2
1	65	4	2	99999	62.85		2006-06	99	99		4	5	0	1	1	0	0	0	0	1	2.68	4		0	0	0	0	0			4		0	0	0	0	0			4		0	0	0	0	0			4
1	86	6	2	99999	99999		2006-06	99	99		4	5	0	1	0	1	1	1	0	1	1.16	2	3	0	1	1	0	0	2		2	3	0	1	0	1	0	2		2	2	0	1	0	1	0	2		2
1	76	6	2	99999	99999		2006-03	99	99		4	5	0	1	1	0	0	0	0	1	2.75	2	2	1	0	0	0	0	1	2.13	2	2	1	0	0	0	0	1	9999	4		0	0	0	0	0			4
0	55	2	1	99999	54.1		2006-05	99	99		2	3	0	1	1	0	0	0	0	1	1.55	2	2	1	0	0	0	0	1	2.6	2	2	1	0	0	0	0	1	2.36	4		0	0	0	0	0			2
0	62	3	1	160	56.98	22.2578	2006-05	99	99		3	4	0	1	1	1	0	1	0	1	3.19	2	2	1	1	0	1	0	1	1.09	2	3	0	1	0	1	1	1	2.57	2	2	0	1	0	1	1	2		2
0	69	4	2	163	57.7	21.717	2008-10	9	6	-3	2	4	0	1	1	0	0	0	0	1	2.15	2	2	1	0	0	0	0	1	1.27	2	2	1	0	0	0	0	1	2.91	2	2	1	0	0	0	0	1	2.49	2
0	76	6	2	99999	99999		2006-04	99	99		5	7	0	1	1	0	0	0	0	1	2.04	2	2	1	0	0	0	0	1	1.41	2	2	1	0	0	0	0	1	1.89	2	2	1	0	0	0	0	1	1.35	2
0	56	2	1	154	47.1	19.86	2006-04	99	99		2	3	0	1	1	0	0	0	0	1	1.34	4		0	0	0	0	0			2	2	1	0	0	0	0	2		2	2	1	0	0	0	0	2		2
0	64	3	1	99999	99999		2006-04	99	99		3	4	0	1	1	0	0	0	0	1	2.6	2	2	1	0	0	0	0	1	2.79	2	2	1	0	0	0	0	1	1.04	2	2	1	0	0	0	0	1	2.26	4
1	76	6	2	99999	99999		2006-03	99	99		4	5	0	1	1	0	0	0	0	1	2.44	2	2	1	0	0	0	0	1	1.15	2	2	1	0	0	0	0	1	2.51	2	2	1	0	0	0	0	1	2.47	2
1	82	6	2	99999	99999		2006-02	99	99		5	6	0	1	1	0	0	0	0	1	2.06	2	2	1	0	0	0	0	1	5.46	4		0	0	0	0	0			4		0	0	0	0	0			4
1	76	6	2	99999	51.8		2006-02	99	99		3	4	0	1	1	0	0	0	0	1	2.01	2	2	1	0	0	0	0	1	2.14	4		0	0	0	0	0			2	2	1	0	0	0	0	1	5.45	4
0	85	6	2	99999	99999		2006-02	99	99		3	5	0	1	0	1	1	1	0	1	1.07	4		0	0	0	0	0			4		0	0	0	0	0			4		0	0	0	0	0			4
1	91	6	2	99999	99999		2006-01	99	99		3	4	0	1	1	0	0	0	0	1	3.34	2	2	1	0	0	0	0	1	2.29	2	2	1	0	0	0	0	1	2.45	2	2	1	0	0	0	0	1	2.12	4
1	74	5	2	166	70.8	25.6931	2006-01	99	99		2	3	0	1	1	0	0	0	0	1	2.31	4		0	0	0	0	0			4		0	0	0	0	0			4		0	0	0	0	0			4
1	72	5	2	165	56	20.5693	2005-12	99	99		3	4	0	2	0	0	0	0	0	2		4		0	0	0	0	0			4		0	0	0	0	0			4		0	0	0	0	0			4
0	87	6	2	99999	99999		2008-10	2	7	5	6	8	0	2	0	0	0	0	0	1	1.03	4		0	0	0	0	0			4		0	0	0	0	0			4		0	0	0	0	0			4
1	73	5	2	99999	99999		2005-12	99	99		3	4	0	1	1	0	0	0	0	1	1.99	4		0	0	0	0	0			4		0	0	0	0	0			4		0	0	0	0	0			4
0	54	1	1	154	47.1	19.86	2005-11	99	99		3	4	0	1	1	0	0	0	0	1	1.87	2	2	1	0	0	0	0	1	3.11	4		0	0	0	0	0			4		0	0	0	0	0			3
0	78	6	2	99999	99999		2005-10	99	99		4	6	0	1	1	0	0	0	0	1	1.37	2	2	1	0	0	0	0	1	6.16	2	2	1	0	0	0	0	1	1.36	2	2	1	0	0	0	0	1	1.54	2
0	88	6	2	99999	99999		2005-10	28	99		5	7	0	1	1	0	0	0	0	1	2.01	2	2	1	0	0	0	0	1	1.19	2	2	1	0	0	0	0	1	1.56	2	2	1	0	0	0	0	1	2.84	2
1	73	5	2	99999	99999		2005-09	99	99		3	4	0	1	0	1	1	1	0	1	1.1	2	2	0	1	1	1	0	1	1.28	2	2	0	1	1	1	0	1	1.11	2	2	0	1	1	1	0	1	2.76	3
0	52	1	1	158	58.6	23.4738	2005-10	99	99		3	4	0	1	1	0	0	0	0	1	2.11	2	2	1	0	0	0	0	1	2.98	2	2	1	0	0	0	0	1	1.32	2	2	1	0	0	0	0	1	3.25	2
0	58	2	1	99999	61.7		2005-09	99	99		2	3	0	1	1	0	0	0	0	1	2.03	2	2	1	0	0	0	0	1	1.12	2	2	1	0	0	0	0	1	3.12	2	2	1	0	0	0	0	1	3.12	2
0	61	3	1	154	49.3	20.7877	2005-09	99	99		3	4	0	1	1	0	0	0	0	1	2.68	2	2	1	0	0	0	0	1	1.56	2	2	1	0	0	0	0	1	2.48	2	2	1	0	0	0	0	1	4.09	2
1	75	6	2	164	62.9	23.3864	2005-08	99	99		5	6	0	1	0	1	1	1	0	1	1.14	4		0	0	0	0	0			4		0	0	0	0	0			4		0	0	0	0	0			4
0	86	6	2	99999	99999		2005-08	99	99		4	6	0	1	1	0	0	0	0	1	2.42	4		0	0	0	0	0			4		0	0	0	0	0			4		0	0	0	0	0			4
1	62	3	1	164	68.5	25.4685	2008-11	3	7	4	2	2	0	1	1	0	0	0	0	1	2.09	2	2	1	0	0	0	0	1	2.25	2	2	1	0	0	0	0	1	3.25	2	2	1	0	0	0	0	1	2.02	2
0	77	6	2	99999	53.4		2005-06	99	99		5	7	0	1	1	0	0	0	0	1	2.68	4		0	0	0	0	0			4		0	0	0	0	0			4		0	0	0	0	0			4
0	74	5	2	99999	99999		2005-06	99	99		3	5	0	1	1	0	0	0	0	1	3.23	2	2	1	0	0	0	0	1	2.31	2	2	1	0	0	0	0	1	3.08	4		0	0	0	0	0			4
1	65	4	2	165	80	29.3848	2005-06	99	99		3	4	0	1	1	0	0	0	0	1	1.61	2	2	1	0	0	0	0	1	1.69	2	2	1	0	0	0	0	1	1.8	2	2	1	0	0	0	0	2		2
1	60	3	1	165	68.8	25.2709	2005-05	99	99		4	4	0	2	0	0	0	0	0	1	1.14	2	4	0	0	0	0	0	2		2	3	1	0	0	0	0	1	2.32	2	2	1	0	0	0	0	1	2.95	2
1	74	5	2	99999	99999		2005-04	99	99		2	3	0	1	0	1	0	0	1	1	1.07	2	2	0	1	0	0	0	1	1.07	2	3	1	0	0	0	0	1	4.18	4		0	0	0	0	0			2
0	82	6	2	99999	99999		2005-05	99	99		4	6	0	1	0	1	0	1	0	1	0.96	4		0	0	0	0	0			4		0	0	0	0	0			2	2	0	1	0	1	0	2		2
1	63	3	1	99999	99999		2005-03	99	99		3	3	0	1	0	1	1	1	1	1	1.11	2	2	0	1	1	1	0	2		2	2	0	1	1	1	1	2		2	3	0	1	0	0	1	2		2
0	65	4	2	150	48	21.3333	2005-03	99	99		4	6	0	1	1	0	0	0	0	1	2.48	2	2	1	0	0	0	0	1	2.43	2	2	1	0	0	0	0	1	1.39	2	2	1	0	0	0	0	1	3.25	2
0	54	1	1	168	71	25.1559	2005-02	99	99		5	6	0	2	0	0	0	0	0	1	1.16	4		0	0	0	0	0					0	0	0	0	0					0	0	0	0	0
0	73	5	2	99999	99999		2005-02	99	99		3	5	0	1	0	1	1	1	0	1	1.21	4		0	0	0	0	0			4		0	0	0	0	0			4		0	0	0	0	0			4
1	69	4	2	160.5	72.7	28.2218	2008-11	0	0	0	3	4	0	1	1	1	1	0	0	1	1.93	4		0	0	0	0	0			4		0	0	0	0	0			4		0	0	0	0	0			2
1	87	6	2	99999	99999		2005-02	99	99		5	6	0	1	0	1	1	1	0	1	1.35	4		0	0	0	0	0			4		0	0	0	0	0			4		0	0	0	0	0			4
0	76	6	2	99999	99999		2004-12	99	99		3	6	0	1	0	1	1	0	0	1	1.14	4		0	0	0	0	0			4		0	0	0	0	0			4		0	0	0	0	0			4
0	67	4	2	158	45	18.026	2005-02	11	99		2	4	0	1	1	0	0	0	0	1	1.61	2	2	1	0	0	0	0	1	1.29	4		0	0	0	0	0			2	2	1	0	0	0	0	1	1.35	2
0	82	6	2	155	71.6	29.8023	2005-01	99	99		4	6	0	1	1	0	0	0	0	1	2.11	2	2	1	0	0	0	0	1	2.46	4		0	0	0	0	0			2	2	1	0	0	0	0	1	2.21	2
1	70	5	2	165	72	26.4463	2005-01	99	99		3	4	0	1	1	0	0	0	0	1	1.99	2	2	1	0	0	0	0	1	2	2	2	1	0	0	0	0	1	1.36	2	2	1	0	0	0	0	1	2.86	2
0	71	5	2	99999	99999		2005-01	99	99		4	6	0	1	1	0	0	0	0	1	2.28	2	2	1	0	0	0	0	1	1.61	2	2	1	0	0	0	0	1	1.75	2	2	1	0	0	0	0	1	4.71	2
0	86	6	2	99999	99999		2004-12	99	99		4	6	0	2	0	0	0	0	0	1	1.11	4		0	0	0	0	0			4		0	0	0	0	0			4		0	0	0	0	0			4
0	85	6	2	99999	99999		2004-12	99	99		4	6	0	1	0	1	1	1	0	1	4.08	4		0	0	0	0	0			4		0	0	0	0	0			4		0	0	0	0	0			4
1	48	1	1	160	43.7	17.0703	2004-12	99	99		5	5	0	1	1	0	0	0	0	1	2.07	2	2	1	0	0	0	0	1	1.54	4		0	0	0	0	0			4		0	0	0	0	0			2
0	47	1	1	166	44.9	16.2941	2004-09	99	99		2	3	0	1	1	0	0	0	0	1	2.94	2	2	1	0	0	0	0	1	3.02	2	2	1	0	0	0	0	1	2.31	2	2	1	0	0	0	0	1	1.78	2
0	69	4	2	150	46.8	20.8	2008-10	9	2	-7	4	6	0	1	1	0	0	0	0	1	2.96	2	2	1	0	0	0	0	1	2.16	2	2	1	0	0	0	0	1	2.9	2	2	1	0	0	0	0	2		2
0	67	4	2	99999	99999		2004-06	99	99		2	4	0	2	0	0	0	0	0	2		4		0	0	0	0	0			4		0	0	0	0	0			4		0	0	0	0	0			4
0	72	5	2	99999	99999		2008-10	20	19	-1	3	5	0	2	0	0	0	0	0	1	1.21	4		0	0	0	0	0			4		0	0	0	0	0			4		0	0	0	0	0			4
1	70	5	2	175.5	67.3	21.8505	2008-10	3	1	-2	3	4	0	1	1	0	0	0	0	1	2.27	2	2	1	0	0	0	0	1	3.8	2	2	1	0	0	0	0	1	2.44	2	2	1	0	0	0	0	1	2.89	2
1	76	6	2	167	66	23.6652	2008-10	4	2	-2	5	6	0	1	1	0	0	0	0	1	1.82	2	2	1	0	0	0	0	1	1.82	2	2	1	0	0	0	0	1	2.1	2	2	1	0	0	0	0	1	2.41	2
0	86	6	2	149	42	18.9181	2008-09	9	1	-8	4	7	0	1	1	1	0	0	1	1	2.5	2	2	1	1	0	0	0	1	1.4	2	2	1	1	0	0	1	1	2.02	2	2	1	1	0	0	1	1	2.89	2
1	51	1	1	174	75.3	24.8712	2008-12	99	99		2	2	0	1	0	1	1	1	0	1	1.06	3	3	1	0	0	0	0	1	1.08	2	3	1	1	1	0	0	1	1.23	2	2	1	1	1	0	0	1	2.36	3
1	62	3	1	99999	72.8		2008-08	1	3	2	3	3	0	1	0	1	1	0	0	1	1.19	2	3	1	0	0	0	0	1	1.31	2	2	1	0	0	0	0	1	1.22	2	2	1	0	0	0	0	1	1.41	2
1	48	1	1	180	85.7	26.4506	2008-09	4	2	-2	2	2	0	1	1	0	0	0	0	1	1.91	2	2	1	0	0	0	0	1	3.9	2	2	1	0	0	0	0	1	2.62	4		0	0	0	0	0			2
1	59	2	1	163	63.6	23.9377	2008-08	17	3	-14	2	2	0	1	1	0	0	0	0	1	2.41	2	4	0	0	0	0	0	2		2	4	0	0	0	0	0	2		2	4	0	0	0	0	0	2		4
1	66	4	2	99999	63.3		2008-08	14	4	-10	2	3	0	1	1	0	0	0	0	1	2.58	2	2	1	0	0	0	0	1	2.18	4		0	0	0	0	0			4		0	0	0	0	0			2
1	62	3	1	99999	67.1		2008-09	4	2	-2	3	3	0	1	1	0	0	0	0	1	2.73	2	2	1	0	0	0	0	1	1.89	2	2	1	0	0	0	0	1	2.55	2	2	1	0	0	0	0	1	2.34	2
0	62	3	1	99999	99999		2008-05	19	17	-2	4	5	0	1	1	0	0	0	0	1	2.37	2	2	1	0	0	0	0	1	1.52	2	2	1	0	0	0	0	1	3.08	2	4	0	0	0	0	0	2		4
0	80	6	2	156	51.3	21.0799	2008-08	0	0	0	4	6	0	1	0	1	0	1	0	1	1.08	3	3	1	0	0	0	0	1	1.03	2	2	1	0	0	0	0	1	2.14	2	2	1	0	0	0	0	1	2.16	2
0	68	4	2	157	51	20.6905	2008-07	2	2	0	2	4	0	1	1	0	0	0	0	1	2.98	2	2	1	0	0	0	0	1	1.97	2	2	1	0	0	0	0	1	3.52	4		0	0	0	0	0			2
0	70	5	2	99999	99999		2008-07	14	99		2	4	0	1	1	0	0	0	0	1	1.56	4		0	0	0	0	0			4		0	0	0	0	0			4		0	0	0	0	0			4
0	74	5	2	152	52.9	22.8965	2008-07	4	0	-4	4	6	0	1	1	1	1	0	0	1	1.88	2	3	1	0	0	0	0	1	1.55	4		0	0	0	0	0			2	2	1	0	0	0	0	1	1.89	2
1	70	5	2	160	50	19.5312	2008-11	11	14	3	4	5	0	1	1	0	0	0	0	1	1.63	2	2	1	0	0	0	0	2		2	2	1	0	0	0	0	2		2	2	1	0	0	0	0	2		4
0	54	1	1	162	52.3	19.9284	2007-12	12	99		3	4	0	1	1	1	1	1	0	1	1.74	3	4	0	0	0	0	0	1	3.05	3	3	1	0	0	0	0	1	2	3	3	1	1	0	1	0	1	2.64	3
1	83	6	2	170	71.1	24.6021	2008-04	3	9	6	5	6	0	1	0	1	1	1	0	2		4		0	0	0	0	0			4		0	0	0	0	0			4		0	0	0	0	0			4
1	59	2	1	99999	99999		2008-07	27	99		2	2	0	2	0	0	0	0	0	1	1.64	4		0	0	0	0	0			4		0	0	0	0	0			4		0	0	0	0	0			4
1	60	3	1	167	63.2	22.6613	2008-07	1	1	0	3	3	0	1	0	1	1	1	0	1	1.06	2	2	0	1	1	1	0	2		2	2	0	1	1	1	0	2		2	2	0	1	1	1	0	2		2
0	73	5	2	164	67.9	25.2454	2008-07	0	0	0	2	4	0	1	1	0	0	0	0	1	1.88	4		0	0	0	0	0			2	2	1	0	0	0	0	2		4		0	0	0	0	0			4
1	74	5	2	168	99999		2008-06	9	10	1	3	4	0	1	1	0	0	0	0	1	1.98	2	3	1	1	1	0	0	1	1.05	4		0	0	0	0	0			4		0	0	0	0	0			2
1	83	6	2	165	77.6	28.5032	2008-06	3	2	-1	4	5	0	1	0	1	0	1	0	1	1.18	4		0	0	0	0	0			4		0	0	0	0	0			4		0	0	0	0	0			4
1	49	1	1	170	77.4	26.782	2008-06	7	3	-4	2	2	0	1	1	0	0	0	0	1	2.3	2	2	1	0	0	0	0	1	2.45	2	2	1	0	0	0	0	1	2.2	2	2	1	0	0	0	0	1	2.12	2
0	84	6	2	99999	48.6		2008-05	15	12	-3	4	6	0	1	0	1	1	1	0	1	1.11	4		0	0	0	0	0			4		0	0	0	0	0			4		0	0	0	0	0			4
0	75	6	2	99999	99999		2008-01	12	14	2	5	7	0	2	0	0	0	0	0	1	1.01	2	4	0	0	0	0	0	1	1.01	2	4	0	0	0	0	0	1	12.8	2	4	0	0	0	0	0	1	0.99	2
0	84	6	2	145	45.2	21.4982	2008-11	0	4	4	4	6	0	1	1	0	0	0	0	1	3.03	2	3	1	1	0	0	0	1	2.14	4		0	0	0	0	0			4		0	0	0	0	0			4
1	80	6	2	99999	99999		2008-04	16	18	2	5	6	0	2	0	0	0	0	0	1	1.32	4		0	0	0	0	0			4		0	0	0	0	0			4		0	0	0	0	0			4
1	66	4	2	175	78.2	25.5347	2008-04	17	3	-14	3	4	0	1	1	0	0	0	0	1	2	2	3	1	1	1	0	0	1	1.53	2	2	1	1	1	0	0	1	2.12	2	2	1	1	1	0	0	1	1.98	2
0	82	6	2	154	56	23.6128	2008-03	6	6	0	4	7	0	1	0	1	0	1	0	1	1.04	4		0	0	0	0	0					0	0	0	0	0					0	0	0	0	0
0	83	6	2	147	43.2	19.9917	2008-03	5	5	0	4	6	0	1	0	1	0	1	0	1	0.98	2	2	0	1	0	1	0	2		4		0	0	0	0	0			2	2	0	1	0	1	0	2		2
0	64	3	1	155	71.6	29.8023	2008-03	2	1	-1	3	4	0	1	0	1	1	1	0	1	1.06	2	3	1	1	1	0	0	1	0.99	2	2	1	1	1	0	0	1	1.26	4		0	0	0	0	0			2
0	55	2	1	158	56.9	22.7928	2008-02	21	1	-20	3	4	0	1	1	0	0	0	0	1	2.56	2	2	1	0	0	0	0	1	2.05	2	2	1	0	0	0	0	1	1.84	2	2	1	0	0	0	0	1	1.52	4
1	80	6	2	171	74	25.3069	2008-02	7	0	-7	4	5	0	1	1	0	0	0	0	1	1.88	2	2	1	0	0	0	0	1	4.29	4		0	0	0	0	0			4		0	0	0	0	0			4
1	79	6	2	178	62.5	19.726	2008-01	9	8	-1	5	6	0	1	1	0	0	0	0	1	2.37	2	2	1	0	0	0	0	1	2.35	4		0	0	0	0	0			2	2	1	0	0	0	0	1	2.54	2
1	83	6	2	99999	99999		2007-12	24	37	13	5	6	0	1	0	1	1	0	0	1	0.93	4		0	0	0	0	0			4		0	0	0	0	0			4		0	0	0	0	0			4
1	67	4	2	163	60.2	22.658	2007-12	99	99		3	4	0	1	1	0	0	0	0	1	1.72	2	3	1	1	1	0	0	1	1.3	2	3	1	0	0	0	0	1	2.96	2	2	1	0	0	0	0	1	2.82	2
0	85	6	2	99999	99999		2008-11	1	99		4	6	0	1	1	0	0	0	0	1	2.69	2	2	1	0	0	0	0	1	1.91	2	2	1	0	0	0	0	1	1.46	2	2	1	0	0	0	0	1	1.91	4
0	82	6	2	99999	99999		2007-12	99	99		4	7	0	1	0	1	1	0	0	1	1.03	4		0	0	0	0	0			4		0	0	0	0	0			4		0	0	0	0	0			4
1	74	5	2	165	65.5	24.0588	2007-12	3	3	0	4	6	0	1	0	1	0	1	0	1	1.1	4		0	0	0	0	0			2	2	0	1	0	1	0	2		4		0	0	0	0	0
1	79	6	2	99999	63.1		2007-11	6	99		5	6	0	1	1	0	0	0	0	1	1.38	2	2	1	0	0	0	0	1	1.61	2	2	1	0	0	0	0	1	2.02	2	2	1	0	0	0	0	2		2
0	76	6	2	99999	99999		2007-10	99	99		4	6	0	1	0	1	0	1	0	1	1.04	4		0	0	0	0	0			4		0	0	0	0	0			3	4	0	0	0	0	0	1	1.02	3
0	74	5	2	99999	37.9		2007-08	99	99		3	5	0	1	0	1	1	1	0	1	1.1	4		0	0	0	0	0			4		0	0	0	0	0			4		0	0	0	0	0			4
0	72	5	2	150	55	24.4444	2007-09	99	99		3	5	0	1	0	1	1	0	0	1	1.33	2	4	0	0	0	0	0	1	1.04	4		0	0	0	0	0			2	3	0	1	1	0	1	2		2
0	56	2	1	99999	67.6		2007-09	99	99		2	3	0	1	1	0	0	0	0	1	1.01	2	2	1	0	0	0	0	1	3.25	2	2	1	0	0	0	0	1	1.66	2	2	1	0	0	0	0	1	4.41	2
0	81	6	2	99999	99999		2007-08	99	99		3	5	0	1	0	1	1	0	0	1	0.96	4		0	0	0	0	0			4		0	0	0	0	0			4		0	0	0	0	0			4
0	83	6	2	99999	99999		2007-09	99	99		5	7	0	1	0	1	1	0	0	1	1.02	4		0	0	0	0	0			4		0	0	0	0	0			4		0	0	0	0	0			4
0	78	6	2	99999	44.6		2007-09	99	99		3	6	0	1	1	1	1	0	0	1	2.78	2	2	1	1	1	0	0	1	1.05	2	2	1	1	1	0	0	1	2.01	2	2	1	1	1	0	0	1	1.76	2
0	97	6	2	99999	99999		2008-11	21	17	-4	3	5	0	1	0	1	1	0	0	2		4		0	0	0	0	0			4		0	0	0	0	0			4		0	0	0	0	0			4
0	61	3	1	155	60.1	25.0156	2007-08	99	99		2	3	0	1	1	0	0	0	0	1	2.43	4		0	0	0	0	0			4		0	0	0	0	0			4		0	0	0	0	0			4
0	77	6	2	160	67	26.1719	2007-08	99	99		5	7	0	1	0	1	1	1	0	1	0.96	4		0	0	0	0	0			4		0	0	0	0	0			4		0	0	0	0	0			4
1	52	1	1	99999	99999		2007-08	99	99		3	3	0	1	1	0	0	0	0	1	2.09	2	2	1	0	0	0	0	1	1.97	2	2	1	0	0	0	0	1	1.75	2	2	1	0	0	0	0	1	1.78	2
0	73	5	2	159	47.4	18.7493	2007-07	99	99		4	6	0	1	0	1	1	1	0	1	0.95	2	2	0	1	1	1	0	2		4		0	0	0	0	0			4		0	0	0	0	0			4
0	80	6	2	160	62	24.2188	2007-07	4	2	-2	4	6	0	1	0	1	0	1	0	1	1.18	4		0	0	0	0	0			2	2	0	1	0	1	0	2		2	2	0	1	0	1	0	2		4
0	88	6	2	142	42	20.8292	2007-05	13	9	-4	3	6	0	1	0	1	1	0	0	1	1.18	4		0	0	0	0	0			4		0	0	0	0	0			2	2	0	1	1	0	0	2		4
1	74	5	2	170	73.5	25.4325	2007-05	8	5	-3	3	4	0	1	1	0	0	0	0	1	1.82	2	2	1	0	0	0	0	1	2.25	4		0	0	0	0	0			4		0	0	0	0	0			2
1	72	5	2	163	78.7	29.621	2007-05	99	99		3	4	0	1	1	0	0	0	0	1	2.06	2	3	1	1	1	0	0	1	1.3	2	2	1	1	1	0	0	1	3.19	2	2	1	1	1	0	0	1	1.79	2
1	74	5	2	170	63.6	22.0069	2007-04	99	99		2	3	0	1	1	0	0	0	0	1	2.27	2	2	1	0	0	0	0	1	1.68	2	2	1	0	0	0	0	2		2	2	1	0	0	0	0	1	2.6	2
1	63	3	1	99999	73.5		2007-04	99	99		4	4	0	1	1	1	1	0	0	1	1.14	2	3	1	0	0	0	0	1	2.17	2	2	1	0	0	0	0	1	1.56	2	2	1	0	0	0	0	1	2.05	2
0	71	5	2	99999	99999		2008-11	13	12	-1	3	5	0	1	1	0	0	0	0	1	1.47	2	2	1	0	0	0	0	1	1.9	2	2	1	0	0	0	0	1	2.04	2	2	1	0	0	0	0	1	1.09	2
0	87	6	2	99999	37.7		2007-04	99	99		3	5	0	1	0	1	1	1	0	1	1.2	2	2	0	1	1	1	0	2		2	2	0	1	1	1	0	2		2	4	0	0	0	0	0	1	1.18	4
1	79	6	2	160	71.8	28.0469	2007-03	99	99		4	5	0	1	1	0	0	0	0	1	1.78	2	2	1	0	0	0	0	1	4.89	2	2	1	0	0	0	0	1	3.25	2	2	1	0	0	0	0	1	1.63	2
1	70	5	2	99999	99999		2007-03	99	99		2	3	0	1	1	0	0	0	0	1	1.97	4		0	0	0	0	0			4		0	0	0	0	0			4		0	0	0	0	0			4
0	69	4	2	99999	49		2007-02	99	99		2	4	0	1	1	0	0	0	0	1	2.7	2	2	1	0	0	0	0	1	2	2	2	1	0	0	0	0	1	2.42	2	2	1	0	0	0	0	1	2.05	2
0	75	6	2	143	54.7	26.7495	2007-03	99	99		4	6	0	1	1	0	0	0	0	1	2.64	2	2	1	0	0	0	0	1	2.02	2	2	1	0	0	0	0	2		4		0	0	0	0	0			2
0	83	6	2	99999	99999		2007-01	99	99		4	7	0	1	0	1	1	1	0	1	1.07	4		0	0	0	0	0			4		0	0	0	0	0			4		0	0	0	0	0			4
0	64	3	1	160	68	26.5625	2007-02	99	99		3	5	0	1	1	0	0	0	0	1	1.96	2	2	1	0	0	0	0	1	2.3	2	2	1	0	0	0	0	1	2.55	2	2	1	0	0	0	0	1	3.18	2
0	78	6	2	164	70.9	26.3608	2007-02	99	99		4	6	0	1	1	0	0	0	0	1	2.74	2	2	1	0	0	0	0	1	1.6	2	2	1	0	0	0	0	1	2.11	2	2	1	0	0	0	0	1	1.51	2
1	74	5	2	167	75	26.8923	2007-02	99	99		3	4	0	1	1	0	0	0	0	1	1.8	2	3	1	1	1	1	0	1	1.53	2	3	0	1	1	1	0	1	1.02	4		0	0	0	0	0			4
1	75	6	2	99999	63		2007-01	99	99		5	6	0	1	0	1	1	0	0	1	1.26	2	2	0	1	1	0	0	2		4		0	0	0	0	0			2	4	0	0	0	0	0	2		4
0	64	3	1	155.7	70.9	29.2462	2008-11	0	0	0	3	4	0	1	1	0	0	0	0	1	2.5	2	2	1	0	0	0	0	1	1.38	2	2	1	0	0	0	0	1	2.87	2	2	1	0	0	0	0	2		2
0	68	4	2	141.5	48.45	24.1981	2007-01	99	99		3	6	0	1	0	1	1	1	0	1	0.99	2	2	0	1	1	1	0	2		2	2	0	1	1	1	0	2		2	2	0	1	1	1	0	2		2
1	70	5	2	99999	99999		2006-12	99	99		4	5	0	2	0	0	0	0	0	1	1.1	2	4	0	0	0	0	0	2		4		0	0	0	0	0			4		0	0	0	0	0			4
1	64	3	1	170	60.65	20.9862	2006-12	99	99		3	3	0	1	1	0	0	0	0	1	2.12	2	2	1	0	0	0	0	1	1.59	2	2	1	0	0	0	0	1	1.84	2	2	1	0	0	0	0	1	2.67	2
1	76	6	2	99999	99999		2006-11	99	99		5	6	0	1	1	0	0	0	0	1	2.43	2	2	1	0	0	0	0	1	1.1	2	2	1	0	0	0	0	1	1.5	2	3	1	1	1	0	0	1	1.4	2
0	62	3	1	99999	99999		2006-11	99	99		3	4	0	1	1	0	0	0	0	1	1.54	4		0	0	0	0	0			4		0	0	0	0	0			4		0	0	0	0	0			4
1	66	4	2	99999	99999		2006-11	99	99		2	3	0	1	1	0	0	0	0	1	2.04	4		0	0	0	0	0			2	2	1	0	0	0	0	2		4		0	0	0	0	0			4
0	66	4	2	160	63.2	24.6875	2006-11	99	99		3	5	0	1	1	0	0	0	0	1	2.91	4		0	0	0	0	0			4		0	0	0	0	0			4		0	0	0	0	0			4
1	59	2	1	172.5	70.8	23.7933	2006-11	99	99		3	3	0	1	1	0	0	0	0	1	2.14	3	2	1	0	0	0	0	2		2	2	1	0	0	0	0	1	1.99	2	2	1	0	0	0	0	1	2.18	2
1	67	4	2	165	76.2	27.989	2006-11	99	99		2	3	0	1	0	1	1	1	0	1	1.04	2	3	0	1	1	0	0	2		2	2	0	1	1	0	0	2		2	4	0	0	0	0	0	2		2
0	77	6	2	99999	65.4		2006-09	99	99		5	7	0	1	0	1	0	1	0	1	1.01	4		0	0	0	0	0			4		0	0	0	0	0					0	0	0	0	0
0	52	1	1	153	60.2	25.7166	2008-11	3	3	0	2	3	0	1	1	0	0	0	0	1	1.51	2	2	1	0	0	0	0	1	1.81	2	2	1	0	0	0	0	1	4.35	2	2	1	0	0	0	0	1	1.09	2
0	85	6	2	99999	99999		2006-09	99	99		4	6	0	2	0	0	0	0	0	1	1.04	4		0	0	0	0	0			4		0	0	0	0	0			4		0	0	0	0	0			4
1	67	4	2	170	63	21.7993	2006-10	99	99		4	5	0	1	1	0	0	0	0	1	2.24	2	2	1	0	0	0	0	1	2.21	2	2	1	0	0	0	0	1	2.38	2	2	1	0	0	0	0	1	2.37	2
1	71	5	2	161.5	47.3	18.1349	2006-10	99	99		2	3	0	1	1	1	0	0	1	1	1.07	4		0	0	0	0	0			4		0	0	0	0	0			4		0	0	0	0	0			4
0	89	6	2	141.6	34.8	17.3561	2006-09	99	99		3	5	0	2	0	0	0	0	0	1	1.02	4		0	0	0	0	0			2	4	0	0	0	0	0	2		2	3	0	1	1	0	0	2		2
1	86	6	2	99999	66.7		2006-09	99	99		3	4	0	1	0	1	1	1	0	1	1.11	2	2	0	1	1	1	0	2		2	4	0	0	0	0	0	1	1.17	4		0	0	0	0	0			4
1	55	2	1	168.5	69.2	24.3728	2006-09	99	99		3	3	0	1	1	1	0	1	1	1	1.97	4		0	0	0	0	0			4		0	0	0	0	0			2	2	1	1	0	1	1	2		2
0	69	4	2	99999	99999		2006-08	99	99		3	5	0	1	1	0	0	0	0	1	2.3	4		0	0	0	0	0			2	2	1	0	0	0	0	1	1.62	2	2	1	0	0	0	0	1	2.29	2
1	79	6	2	99999	57		2006-08	99	99		4	5	0	1	1	1	0	0	1	1	2.36	2	4	0	0	0	0	0	1	1.32	2	3	0	1	1	1	0	2		4		0	0	0	0	0			2
1	57	2	1	99999	99999		2006-08	99	99		2	2	0	1	0	1	0	1	0	2		4		0	0	0	0	0			4		0	0	0	0	0			4		0	0	0	0	0			2
0	77	6	2	99999	99999		2006-07	99	99		3	5	0	1	0	1	0	1	0	1	1.48	4		0	0	0	0	0			4		0	0	0	0	0			4		0	0	0	0	0			4
[truncated: 85 more columns]
