# Supplementary material for: Antithrombotic treatments in patients with acute ischemic stroke and non-valvular atrial fibrillation before introduction of non-vitamin K antagonist oral anticoagulants into practice in Korea
Source: PLoS One. 2018 Nov 2;13(11):e0202803. doi: 10.1371/journal.pone.0202803 (PMC6214500; doi:10.1371/journal.pone.0202803)
Supplement: S1 Table — (XLSX) [file pone.0202803.s002.xlsx]

## Sheet: 3. visit, 처방내역-559pattern
	3. 각 11개 시점 visit, 처방 내역(Raw data, 별도 보정X) -(559개 pattern)
	- 각 시점별 환자들의 visit pattern에 처방내역을 얹은 것임
	Visit								처방내역
		환자의 방문이 확인 됨(퇴원 후 외래 FU 혹은 퇴원 후 재입원)							●	VKA and Antiplatelet
									◎	VKA only
									○	Antiplatelet only
									▽	None
	pattern ID	환자수	누적환자수	퇴원시점	퇴원 후 1개월 (±2주)	퇴원 후 2개월 (±2주)	퇴원 후 3개월 (±2주)	퇴원 후 6개월 (±1개월)	퇴원 후 9개월 (±1개월)	퇴원 후 12개월 (±1개월)	퇴원 후 18개월 (±3개월)	퇴원 후 24개월 (±3개월)	퇴원 후 30개월 (±3개월)	퇴원 후 36개월 (±3개월)
	1	160	160	◎	◎	◎	◎	◎	◎	◎	◎	◎	◎	◎
	2	107	267	◎
	3	67	334	○
	4	52	386	▽
	5	48	434	◎	◎		◎	◎	◎	◎	◎	◎	◎	◎
	6	41	475	◎	◎
	7	19	494	◎	◎	◎
	8	15	509	●
	9	15	524	◎	◎	◎	◎
	10	14	538	◎	◎	◎	◎	◎	◎	◎	◎	◎
	11	14	552	◎	◎	◎	◎	◎
	12	14	566	◎	◎	◎		◎	◎	◎	◎	◎	◎	◎
	13	13	579	◎	◎	◎	◎	◎	◎	◎	◎
	14	12	591	◎	◎	◎	◎	◎	◎	◎
	15	11	602	◎	▽
	16	10	612	●	●	●	●	●	●	●	●	●	●	●
	17	9	621	◎	◎	◎	◎	◎	◎	◎	◎	◎	◎
	18	8	629	●	◎	◎	◎	◎	◎	◎	◎	◎	◎	◎
	19	8	637	◎	◎	◎	◎	◎	◎
	20	7	644	○	○
	21	6	650	◎	◎			◎	◎	◎	◎	◎	◎	◎
	22	6	656	◎		◎	◎	◎	◎	◎	◎	◎	◎	◎
	23	6	662	○	○	○	○	○	○	○	○	○	○	○
	24	6	668	○	▽
	25	5	673	◎	◎	◎	◎	◎	◎	◎	◎	●	●	●
	26	5	678	◎	◎	◎	◎	◎	◎		◎	◎	◎	◎
	27	5	683	◎	◎		◎	◎	◎	◎	◎	◎	◎
	28	5	688	◎	◎		◎
	29	5	693	◎			◎	◎	◎	◎	◎	◎	◎	◎
	30	5	698	○	◎	◎	◎	◎	◎	◎	◎	◎	◎	◎
	31	5	703	○	○	○	○
	32	5	708	○	○	○
	33	4	712	●	●
	34	4	716	◎	◎	◎	◎	◎	◎	◎	○	○	○	○
	35	4	720	◎	◎	◎	◎	◎			◎	◎	◎	◎
	36	4	724	◎	◎		◎	◎	◎	◎	◎
	37	4	728	◎	◎		◎	◎	◎		◎	◎	◎	◎
	38	4	732	◎	◎		◎	◎
	39	4	736	◎		◎
	40	4	740	◎								◎	◎	◎
	41	4	744	○	○
	42	3	747	●	●	●	●	●	●	●	●
	43	3	750	●	◎		◎	◎	◎	◎	◎	◎	◎	◎
	44	3	753	●	▽
	45	3	756	◎	◎	◎	◎	◎	◎	◎	◎	◎	●	●
	46	3	759	◎	◎	◎	◎	◎	◎	◎	◎	◎	◎	●
	47	3	762	◎	◎	◎	◎	◎	◎	◎	▽
	48	3	765	◎	◎	◎	▽
	49	3	768	◎	◎				◎	◎	◎	◎	◎	◎
	50	3	771	◎	○	○	○	○	○	○	○	○	○	○
	51	3	774	◎		◎	◎	◎			◎	◎	◎	◎
	52	3	777	◎			▽
	53	3	780	◎									◎	◎
	54	3	783	○	○	◎	◎	◎	◎	◎	◎	◎	◎	◎
	55	3	786	○	○	▽
	56	3	789	○	○		○	○	○	○	○	○	○	○
	57	3	792	○		○
	58	2	794	●	●	●	●	●	●	●	●	●	●
	59	2	796	●	●	●	●	●	●	◎	◎	◎	◎	◎
	60	2	798	●	●		●	●	●	●	●	●	●	●
	61	2	800	●	●		●	●	●		●	●	●	●
	62	2	802	●	●	●	●	●	●	●	●	●	●	●
	63	2	804	●	◎	◎	◎	◎	◎	◎	◎	◎
	64	2	806	●			●	●	●	●	●	●	●	●
	65	2	808	●							○	○	○	○
	66	2	810	◎	●	●	●	●	●	●	●	●	●	●
	67	2	812	◎	◎	●	●	●	●	●	●	●	●	●
	68	2	814	◎	◎	◎	◎	◎	◎	◎	●	●	●	●
	69	2	816	◎	◎	◎	◎	◎	◎	◎	◎	◎	○
	70	2	818	◎	◎	◎	◎	◎	◎	◎	◎	◎		◎
	71	2	820	◎	◎	◎	◎	◎	◎	◎	◎		◎	◎
	72	2	822	◎	◎	◎	◎	◎	◎	○	○	○	○
	73	2	824	◎	◎	◎	◎	◎	◎	○
	74	2	826	◎	◎	◎	◎	○	○	○	○	○	○	○
	75	2	828	◎	◎	◎	◎		◎	◎	◎	◎	◎	◎
	76	2	830	◎	◎	◎	◎			◎	◎	◎	◎	◎
	77	2	832	◎	◎	◎	◎				◎	◎	◎	◎
	78	2	834	◎	◎	◎	○	○	○	○	○	○	○	○
	79	2	836	◎	◎	◎	○
	80	2	838	◎	◎	◎		◎	◎
	81	2	840	◎	◎	◎		◎		◎	◎
	82	2	842	◎	◎	◎					◎
	83	2	844	◎	◎		◎	◎	◎	◎
	84	2	846	◎	◎		◎	◎	◎
	85	2	848	◎	◎		◎	◎		◎	◎	◎	◎	◎
	86	2	850	◎	◎		◎		◎	◎	◎	◎	◎	◎
	87	2	852	◎	◎		◎		◎		◎	◎	◎	◎
	88	2	854	◎	◎		◎			◎	◎	◎	◎	◎
	89	2	856	◎	◎			◎
	90	2	858	◎	◎				◎
	91	2	860	◎	◎					◎	◎	◎	◎	◎
	92	2	862	◎	◎						◎	◎	◎	◎
	93	2	864	◎	▽	▽	▽
	94	2	866	◎		◎	◎	◎	◎	◎	◎	◎	◎
	95	2	868	◎		◎	◎	◎	◎		◎	◎	◎	◎
	96	2	870	◎		◎	◎	◎			◎	◎
	97	2	872	◎		◎		◎	◎	◎	◎	◎	◎	◎
	98	2	874	◎		◎		◎	◎		◎	◎	◎	◎
	99	2	876	◎		◎		◎
	100	2	878	◎		◎					◎	◎	◎	◎
	101	2	880	◎					◎	◎	◎	◎	◎	◎
	102	2	882	◎							◎	◎	◎	◎
	103	2	884	◎							○	○	○	○
	104	2	886	○	○	○	○	○	○	○	○	○	○	○
	105	2	888	○	○	○	▽
	106	2	890	○	○		○			○	○	○	○	○
	107	2	892	○		○	○
	108	2	894	○			○
	109	2	896	○				▽
	110	2	898	○					▽
	111	2	900	○							▽
	112	2	902	▽	▽
	113	2	904	▽									○	○
	114	1	905	●	●	●	●	●	●	●	●	●	●	◎
	115	1	906	●	●	●	●	●	●	●	●	●	◎	◎
	116	1	907	●	●	●	●	●	●	●	●	●	○
	117	1	908	●	●	●	●	●	●	●	●	●	▽	▽
	118	1	909	●	●	●	●	●	●	●	●	◎	◎	◎
	119	1	910	●	●	●	●	●	●	●	●	○	○	○
	120	1	911	●	●	●	●	●	●	●	●	▽
	121	1	912	●	●	●	●	●	●	●	◎	◎	▽	○
	122	1	913	●	●	●	●	●	●	●	○	○	○	○
	123	1	914	●	●	●	●	●	●	○	○	○		▽
	124	1	915	●	●	●	●	●	●		◎	◎	◎	◎
	125	1	916	●	●	●	●	●	◎		○
	126	1	917	●	●	●	●	●		◎	◎	◎	◎	◎
	127	1	918	●	●	●	●	●			●	●	●	●
	128	1	919	●	●	●	●	●
	129	1	920	●	●	●	●	●	●		●	●	●	◎
	130	1	921	●	●	●	●	●		◎	◎	◎	◎	◎
	131	1	922	●	●	●	●	◎	◎	◎	◎	◎	◎	◎
	132	1	923	●	●	●	●		●	●	●	●	●	●
	133	1	924	●	●	●	◎	◎	●		●	●	●	●
	134	1	925	●	●	●	◎	◎	○	○	○	○	○	○
	135	1	926	●	●	●	▽	●	●	●
	136	1	927	●	●	●		●	●	●	●	●	●	●
	137	1	928	●	●	●		●	●	◎	◎	◎	◎	◎
	138	1	929	●	●	●		●	●		●	○	○	●
	139	1	930	●	●	●		●	◎	●	◎	◎	◎	◎
	140	1	931	●	●	●		●			◎	◎	◎	◎
	141	1	932	●	●	●				●
	142	1	933	●	●	●				●	●	●	●	●
	143	1	934	●	●	●
	144	1	935	●	●	●	●	●	●		●	●
	145	1	936	●	●	●	●	▽
	146	1	937	●	●	◎	◎	◎	◎	●	●	●	●	▽
	147	1	938	●	●	◎	◎		◎		◎	●	▽
	148	1	939	●	●	○	○	○	○		○	○	○	○
	149	1	940	●	●		●	●	●	●	●	●	●	●
	150	1	941	●	●		●	●			●	●	◎
	151	1	942	●	●		●	●	●	●	●
	152	1	943	●	●		●	◎	◎	◎	◎	◎	◎	◎
	153	1	944	●	●		●	○	○	○	○	○	◎	◎
	154	1	945	●	●		●
	155	1	946	●	●		●	●	●		●	●	●	●
	156	1	947	●	●		◎	◎	◎	◎	◎	◎	◎	◎
	157	1	948	●	●		○	○	○	○	○	○	○	○
	158	1	949	●	●			●	●	●	●	●	●	●
	159	1	950	●	●				●		●	●	●	●
	160	1	951	●	●						◎	●	●	●
	161	1	952	●	●									○
	162	1	953	●	●	●	●	●		●	●	◎	◎	◎
	163	1	954	●	●	●	●	◎	◎	◎	◎	◎	◎	◎
	164	1	955	●	●	●	◎			◎	◎
	165	1	956	●	●	●			●	●	●	●	●	●
	166	1	957	●	●	●				◎	◎	◎	◎	◎
	167	1	958	●	●	●		●	●	●	●	●	●	●
	168	1	959	●	●		●	●	●	●	●	●	●	●
	169	1	960	●	●		●	●	●		●	●	●	●
	170	1	961	●	●				▽	○	○	○	○
	171	1	962	●	●						●	●
	172	1	963	●	◎	●	●	●	●	●	●	●	●	●
	173	1	964	●	◎	◎	◎	●
	174	1	965	●	◎	◎	◎	◎	◎	●	●	●	●	●
	175	1	966	●	◎	◎	◎	◎	◎	◎	●	◎	◎	◎
	176	1	967	●	◎	◎	◎	◎	◎	◎	◎	◎	▽
	177	1	968	●	◎	◎	◎	◎	◎	◎
	178	1	969	●	◎	◎	◎	◎		◎	◎	◎	◎	◎
	179	1	970	●	◎	◎	◎	◎			◎	◎	◎	◎
	180	1	971	●	◎	◎	◎		●	●	◎	◎	◎
	181	1	972	●	◎	◎							●
	182	1	973	●	◎	▽
	183	1	974	●	◎		●		●		●	●	●
	184	1	975	●	◎		◎	◎	◎	●	●	●	●	●
	185	1	976	●	◎		◎	◎	◎	◎
	186	1	977	●	○	○	○	○	○	○	▽	▽	▽	▽
	187	1	978	●	○
	188	1	979	●	▽	◎	●	●	●
	189	1	980	●	▽	○		○		○
	190	1	981	●	▽		○	▽
	191	1	982	●		●	●	●	●	●	▽
	192	1	983	●		●	●	●	●		●	●	●	●
	193	1	984	●		●	●	◎	◎	◎	◎	◎	◎	◎
	194	1	985	●		●	●		●		●	●	●	●
	195	1	986	●		●	●
	196	1	987	●		●	○	○	○		○	○	○	○
	197	1	988	●		●		●			○	○	○	○
	198	1	989	●		●	●		◎
	199	1	990	●		●		●	●	●	●	●	●	●
	200	1	991	●		●		●	●		○	○	○	○
	201	1	992	●		◎	◎	◎	◎	◎	◎	◎	◎	◎
	202	1	993	●		◎	◎	◎	◎	◎	◎	◎	◎
	203	1	994	●		◎	▽	◎	◎	◎	◎	●
	204	1	995	●		◎			◎	◎	◎	◎	◎	◎
	205	1	996	●		◎			◎	◎	◎	○	○	○
	206	1	997	●		◎					◎	◎	◎
	207	1	998	●		◎
	208	1	999	●		○	▽	▽	▽	▽	▽	▽	▽
	209	1	1000	●		▽
	210	1	1001	●			●	●	●	●	●	●	●	◎
	211	1	1002	●			●	●	●	●	●
	212	1	1003	●			●	◎	◎		●	●	●	●
	213	1	1004	●			●	●	●	●	●	●	●	●
	214	1	1005	●			◎				◎	◎	◎	◎
	215	1	1006	●			○	○	◎	◎	●	●	●	●
	216	1	1007	●			○	○	○	○	○	○
	217	1	1008	●				▽	◎		◎	◎	◎	◎
	218	1	1009	●								○
	219	1	1010	●										●
	220	1	1011	◎	●	●	●	●	●	●	●	◎	◎	◎
	221	1	1012	◎	●	●	●	●	●	●	●	○	○	○
	222	1	1013	◎	●	●	●	●	●	●	●
	223	1	1014	◎	●	●	●	●	●	●	◎	◎	◎	◎
	224	1	1015	◎	●	●	●	●	◎	◎	◎	◎	◎	◎
	225	1	1016	◎	●	●	●	◎	◎	◎	◎	◎	◎	◎
	226	1	1017	◎	●	●	●	○	○	▽	●	●	●	●
	227	1	1018	◎	●	●	●		◎
	228	1	1019	◎	●	●	●			●	●	●	●	●
	229	1	1020	◎	●	●	○	○	○	○
	230	1	1021	◎	●	●		○	●	●	●	●	●	●
	231	1	1022	◎	●	◎	◎	●	●	◎		◎
	232	1	1023	◎	●	◎	◎	◎	◎	◎	●	●	●	●
	233	1	1024	◎	●	◎	◎	◎	◎	◎	◎	◎	◎	◎
	234	1	1025	◎	●	◎	◎	◎	◎	◎	◎	◎	◎	○
	235	1	1026	◎	●	○	○	○	●	◎	◎	◎	◎	◎
	236	1	1027	◎	●	○		○	○	○
	237	1	1028	◎	●	○				○	○	○	○	▽
	238	1	1029	◎	●	▽	▽	◎
	239	1	1030	◎	●		●	●	●	●	●	◎	◎	◎
	240	1	1031	◎	●		●	●	●	●	◎	◎	◎	◎
	241	1	1032	◎	●			●	○	○	●	○	○	○
	242	1	1033	◎	●			▽		○	●	●	●	●
	243	1	1034	◎	●				◎	◎	◎	◎	◎	◎
	244	1	1035	◎	●
	245	1	1036	◎	◎	●	●	●	●	●	●	●	●	○
	246	1	1037	◎	◎	●	●	●	●	●
	247	1	1038	◎	◎	●	◎	◎	●	●	◎	◎	●	●
	248	1	1039	◎	◎	◎	●	●	●	●	●
	249	1	1040	◎	◎	◎	●	●	●	●	○	○	○	○
	250	1	1041	◎	◎	◎	●			●	●	●	●	●
	251	1	1042	◎	◎	◎	◎	●	●	●	●
	252	1	1043	◎	◎	◎	◎	●	●	●	○		●	●
	253	1	1044	◎	◎	◎	◎	◎	●	●	●	●	●	●
	254	1	1045	◎	◎	◎	◎	◎	◎	●	●	●	●	◎
	255	1	1046	◎	◎	◎	◎	◎	◎	◎	◎	●	●	◎
	256	1	1047	◎	◎	◎	◎	◎	◎	◎	◎	●
	257	1	1048	◎	◎	◎	◎	◎	◎	◎	◎	◎	◎	○
	258	1	1049	◎	◎	◎	◎	◎	◎	◎	◎	◎	◎	▽
	259	1	1050	◎	◎	◎	◎	◎	◎	◎	◎	◎	○	●
	260	1	1051	◎	◎	◎	◎	◎	◎	◎	◎	◎	▽	◎
	261	1	1052	◎	◎	◎	◎	◎	◎	◎	◎	○
	262	1	1053	◎	◎	◎	◎	◎	◎	◎	◎	▽	▽	▽
	263	1	1054	◎	◎	◎	◎	◎	◎	◎	○	○	●	●
	264	1	1055	◎	◎	◎	◎	◎	◎	◎	○	▽
	265	1	1056	◎	◎	◎	◎	◎	◎	◎	▽	◎	◎	◎
	266	1	1057	◎	◎	◎	◎	◎	◎	◎			○	○
	267	1	1058	◎	◎	◎	◎	◎	◎		◎	●	◎	◎
	268	1	1059	◎	◎	◎	◎	◎	◎		◎	◎	◎	●
	269	1	1060	◎	◎	◎	◎	◎	○	◎	◎	◎	◎
	270	1	1061	◎	◎	◎	◎	◎	○	◎	○	◎	◎	◎
	271	1	1062	◎	◎	◎	◎	◎	○	○	○	○	○	○
	272	1	1063	◎	◎	◎	◎	◎	○
	273	1	1064	◎	◎	◎	◎	◎	○
	274	1	1065	◎	◎	◎	◎	◎	▽
	275	1	1066	◎	◎	◎	◎	◎		◎	◎	◎	◎	◎
	276	1	1067	◎	◎	◎	◎	◎		◎	◎
	277	1	1068	◎	◎	◎	◎	◎		◎
	278	1	1069	◎	◎	◎	◎	◎						◎
	279	1	1070	◎	◎	◎	◎	○	●	●	◎	◎	◎	◎
	280	1	1071	◎	◎	◎	◎	○	◎	◎	◎	◎	◎	◎
	281	1	1072	◎	◎	◎	◎	○	○		○	○	○	○
	282	1	1073	◎	◎	◎	◎	○	○
	283	1	1074	◎	◎	◎	◎	○	○	▽	○	○
	284	1	1075	◎	◎	◎	◎	○		○	○	○	○	○
	285	1	1076	◎	◎	◎	◎	○
	286	1	1077	◎	◎	◎	◎	▽	○	●	●			●
	287	1	1078	◎	◎	◎	◎	▽	○	○
	288	1	1079	◎	◎	◎	◎	▽		◎
	289	1	1080	◎	◎	◎	◎	▽
	290	1	1081	◎	◎	◎	◎		◎	◎	○	○	○	○
	291	1	1082	◎	◎	◎	◎		◎		◎	◎	◎	◎
	292	1	1083	◎	◎	◎	◎		◎
	293	1	1084	◎	◎	◎	◎				◎	●	◎	◎
	294	1	1085	◎	◎	◎	◎				◎	◎	◎
	295	1	1086	◎	◎	◎	◎				◎		◎	◎
	296	1	1087	◎	◎	◎	◎				◎
	297	1	1088	◎	◎	◎	◎				○	○	○	○
	298	1	1089	◎	◎	◎	◎				▽
	299	1	1090	◎	◎	◎	◎					▽
	300	1	1091	◎	◎	◎	◎						◎	◎
	301	1	1092	◎	◎	◎	○	◎	◎	◎	◎	◎	◎	◎
	302	1	1093	◎	◎	◎	○	◎	◎	◎	◎	◎	◎
	303	1	1094	◎	◎	◎	○			▽
	304	1	1095	◎	◎	◎		◎	◎	◎	◎	◎	◎	○
	305	1	1096	◎	◎	◎		◎	◎	◎	◎	◎	◎
	306	1	1097	◎	◎	◎		◎	◎	◎	◎
	307	1	1098	◎	◎	◎		◎	◎	◎	○	○	▽
	308	1	1099	◎	◎	◎		◎	◎	◎
	309	1	1100	◎	◎	◎		◎	◎	○	○	○
	310	1	1101	◎	◎	◎		◎	◎	○
	311	1	1102	◎	◎	◎		○	○	○	○	○	○	○
	312	1	1103	◎	◎	◎			◎	◎
	313	1	1104	◎	◎	◎			○	○	◎	◎	◎
	314	1	1105	◎	◎	◎				◎	◎	◎	◎	◎
	315	1	1106	◎	◎	◎					◎	◎
	316	1	1107	◎	◎	◎							◎	○
	317	1	1108	◎	◎	○	◎	◎	◎	◎	◎	○	◎	◎
	318	1	1109	◎	◎	○	○	○	○	○	○	○	○	○
	319	1	1110	◎	◎	○		○	○		○	○	○	○
	320	1	1111	◎	◎	○		○	○
	321	1	1112	◎	◎	○
	322	1	1113	◎	◎	▽	◎	◎	▽
	323	1	1114	◎	◎	▽	○	○
	324	1	1115	◎	◎	▽	▽	○	○
	325	1	1116	◎	◎		●	●	●	●	●	●	●	●
	326	1	1117	◎	◎		◎	●	◎	◎	◎	◎	◎
	327	1	1118	◎	◎		◎	◎	●	●	●	◎	◎	◎
	328	1	1119	◎	◎		◎	◎	◎	●	●	●	●	●
	329	1	1120	◎	◎		◎	◎	◎	◎	●	●	◎	◎
	330	1	1121	◎	◎		◎	◎	◎	◎	◎	◎	●	◎
	331	1	1122	◎	◎		◎	◎	◎	◎	◎	◎	◎	○
	332	1	1123	◎	◎		◎	◎	◎	◎	◎	◎	◎	▽
	333	1	1124	◎	◎		◎	◎	◎	◎	◎	▽
	334	1	1125	◎	◎		◎	◎	◎	◎	◎		◎	◎
	335	1	1126	◎	◎		◎	◎	◎	◎	▽
	336	1	1127	◎	◎		◎	◎	◎	◎		◎	◎
	337	1	1128	◎	◎		◎	◎	◎	○	○	○	○
	338	1	1129	◎	◎		◎	◎	◎	▽
	339	1	1130	◎	◎		◎	◎	◎		○
	340	1	1131	◎	◎		◎	◎	◎			◎	◎	◎
	341	1	1132	◎	◎		◎	◎	◎				▽
	342	1	1133	◎	◎		◎	◎	○	○	○	○	○	○
	343	1	1134	◎	◎		◎	◎			◎	◎	◎	◎
	344	1	1135	◎	◎		◎	○	○	○	○	○		○
	345	1	1136	◎	◎		◎		◎		●	●	●	●
	346	1	1137	◎	◎		◎				◎	◎	◎	◎
	347	1	1138	◎	◎		◎					○	○	○
	348	1	1139	◎	◎		○	○	○	○	○	○	○	○
	349	1	1140	◎	◎			◎	◎	◎	◎	◎	▽	◎
	350	1	1141	◎	◎			◎	◎	◎	◎	◎
	351	1	1142	◎	◎			◎	◎	○	○
	352	1	1143	◎	◎			◎			◎	◎	◎	◎
	353	1	1144	◎	◎			▽	▽	○	○	○		▽
	354	1	1145	◎	◎				◎	●	○	○	○	○
	355	1	1146	◎	◎				▽
	356	1	1147	◎	◎					◎		◎
	357	1	1148	◎	◎					◎				◎
	358	1	1149	◎	◎					◎
	359	1	1150	◎	◎						●
	360	1	1151	◎	◎							◎		◎
	361	1	1152	◎	○	●	◎	●	●	●	●	●	●	●
	362	1	1153	◎	○	◎	◎	◎	◎	◎	◎	◎	◎	◎
	363	1	1154	◎	○	○	◎	○	○
	364	1	1155	◎	○	○	○
	365	1	1156	◎	○	○
	366	1	1157	◎	○		▽	▽	▽	▽	○	○
	367	1	1158	◎	○
	368	1	1159	◎	▽	◎	◎	●	●	●	●	●	●	●
	369	1	1160	◎	▽	◎	◎	◎	◎	◎	◎	◎	◎	◎
	370	1	1161	◎	▽	◎	◎	◎	◎	◎	◎
	371	1	1162	◎	▽	◎	◎	◎	◎	◎	○	○	○	○
	372	1	1163	◎	▽	○	○	○	○	○
	373	1	1164	◎	▽	▽	○	◎	◎	◎	◎	◎	◎	◎
	374	1	1165	◎	▽	▽	▽	○	○	○	○	○	○	○
	375	1	1166	◎	▽	▽	▽	▽	▽	▽	●	●	◎	●
	376	1	1167	◎	▽	▽	▽						▽
	377	1	1168	◎	▽	▽
	378	1	1169	◎	▽			▽
	379	1	1170	◎		●	●	●	●	●	●	●	●	●
	380	1	1171	◎		◎	●	●			●	●	◎	◎
	381	1	1172	◎		◎	◎	◎	◎	●	●	●	○	○
	382	1	1173	◎		◎	◎	◎	◎	◎	◎	●	●	●
	383	1	1174	◎		◎	◎	◎		◎	◎	◎
	384	1	1175	◎		◎	◎	▽
	385	1	1176	◎		◎	◎				◎	◎	◎	◎
	386	1	1177	◎		◎	◎						◎	○
	387	1	1178	◎		◎	○	◎	◎
	388	1	1179	◎		◎	○			○	○	○	○
	389	1	1180	◎		◎	▽
	390	1	1181	◎		◎		◎	●	●	●	●
	391	1	1182	◎		◎		◎	◎	◎	◎	◎	◎
	392	1	1183	◎		◎		◎	◎	◎	◎	◎
	393	1	1184	◎		◎		◎		◎	◎	◎	◎	◎
	394	1	1185	◎		◎		◎		◎			◎
	395	1	1186	◎		◎		◎			◎	◎	◎
	396	1	1187	◎		◎		○	○	○	○	○	○	○
	397	1	1188	◎		◎		○	○
	398	1	1189	◎		◎			▽	◎
	399	1	1190	◎		◎						◎	●	○
	400	1	1191	◎		◎							▽	○
	401	1	1192	◎		○			●		○
	402	1	1193	◎		▽	▽
	403	1	1194	◎		▽
	404	1	1195	◎			●	○	○	○	○	○
	405	1	1196	◎			●	▽
	406	1	1197	◎			◎	◎		◎	◎	◎	◎	◎
	407	1	1198	◎			◎	◎		◎	◎
	408	1	1199	◎			◎	◎			◎	◎	◎	◎
	409	1	1200	◎			◎	◎			◎	◎	▽
	410	1	1201	◎			◎	◎
	411	1	1202	◎			◎				◎
	412	1	1203	◎			○	○			◎	◎	◎	◎
	413	1	1204	◎			○				▽
	414	1	1205	◎			○
	415	1	1206	◎				◎		◎	◎	◎	○	○
	416	1	1207	◎				◎			◎	◎	◎	◎
	417	1	1208	◎				◎
	418	1	1209	◎				○			◎
	419	1	1210	◎				○
	420	1	1211	◎				▽	▽
	421	1	1212	◎					◎	◎	◎
	422	1	1213	◎					◎
	423	1	1214	◎						◎	◎	◎	◎	◎
	424	1	1215	◎						◎
	425	1	1216	◎						○
	426	1	1217	◎						▽	◎	◎	◎	◎
	427	1	1218	◎							●	●	●	●
	428	1	1219	◎							●	●	●	▽
	429	1	1220	◎							◎			◎
	430	1	1221	◎							◎
	431	1	1222	◎								●	●
	432	1	1223	◎								◎
	433	1	1224	◎								○	○	○
	434	1	1225	◎									◎
	435	1	1226	◎										◎
	436	1	1227	◎										○
	437	1	1228	○	●	●	●	●	●	●	●	●	●	●
	438	1	1229	○	●	●	●		●	●	◎	◎	◎	◎
	439	1	1230	○	●	●		●	●	●	●	●	●	●
	440	1	1231	○	●	●		●	●	●	●
	441	1	1232	○	●	◎	◎	◎	◎	◎	◎	◎	◎	◎
	442	1	1233	○	●		●				●	○	○	○
	443	1	1234	○	◎	●	●	●	●	●	●
	444	1	1235	○	◎	◎	◎	◎	◎	◎	◎	◎
	445	1	1236	○	◎	◎	◎	◎	◎	◎	◎	▽
	446	1	1237	○	◎	◎	◎	◎	◎	◎
	447	1	1238	○	◎	◎	◎	◎	○
	448	1	1239	○	◎	◎	◎	◎		◎	◎	◎	◎	◎
	449	1	1240	○	◎	◎	◎	◎
	450	1	1241	○	◎	◎	◎	○	○
	451	1	1242	○	◎	◎	◎		◎
	452	1	1243	○	◎	◎	◎			◎
	453	1	1244	○	◎	◎	◎				◎	◎	◎	◎
	454	1	1245	○	◎	◎	◎
	455	1	1246	○	◎		◎			◎	◎	◎	◎	◎
	456	1	1247	○	◎						○
	457	1	1248	○	◎
	458	1	1249	○	○	◎	◎	◎	◎	◎
	459	1	1250	○	○	◎		◎	◎		◎	◎	◎	◎
	460	1	1251	○	○	○	○	○	●	●	◎	◎	◎	◎
	461	1	1252	○	○	○	○	○	○	○	○	○
	462	1	1253	○	○	○	○	○	○	○	○	○	○	○
	463	1	1254	○	○	○	○	○	○	○
	464	1	1255	○	○	○	○	○	○			◎
	465	1	1256	○	○	○	○	○	○	○	○
	466	1	1257	○	○	○	○	○	▽
	467	1	1258	○	○	○	○	○		○	○	○	○	○
	468	1	1259	○	○	○	○	○
	469	1	1260	○	○	○	○	○	○
	470	1	1261	○	○	○	○	○	○
	471	1	1262	○	○	○	○	○		○	○	○	○
	472	1	1263	○	○	○	○	○	○	○	○	○	○	○
	473	1	1264	○	○	○	○	○	○	○	○	○	○
	474	1	1265	○	○	○		○	○	○	○	○	○	○
	475	1	1266	○	○	○		○	○	○
	476	1	1267	○	○	○
	477	1	1268	○	○		◎	◎	◎	◎	◎
	478	1	1269	○	○		○	○	○	○	○	○	○	○
	479	1	1270	○	○		○	○	○	○	○		◎	◎
	480	1	1271	○	○		○	○	○	○
	481	1	1272	○	○		○	○	○	○
	482	1	1273	○	○		○	○	○	▽
	483	1	1274	○	○		○	○	○		○
	484	1	1275	○	○		○	○	○
	485	1	1276	○	○		○	○			○	○		○
	486	1	1277	○	○		○	○
	487	1	1278	○	○		○	▽	▽	▽	▽
	488	1	1279	○	○		○				○	○	○
	489	1	1280	○	○		○
	490	1	1281	○	○		▽			○	○
	491	1	1282	○	○		▽
	492	1	1283	○	○			○	○	○		○	○
	493	1	1284	○	○			○			○		○	○
	494	1	1285	○	○			○
	495	1	1286	○	○			▽
	496	1	1287	○	○				○	○	▽
	497	1	1288	○	○					○
	498	1	1289	○	○	○	○	○	○	◎
	499	1	1290	○	○	○	○	○	○
	500	1	1291	○	○	○	○	○	○	○	○	○
	501	1	1292	○	○	○	○
	502	1	1293	○	○	○	▽	▽	▽		▽	▽	▽	▽
	503	1	1294	○	○	○		○		○	○	○	○
	504	1	1295	○	○	○		○	○	○	○	○	○	○
	505	1	1296	○	○	○				○			○
	506	1	1297	○	○	○
	507	1	1298	○	○	○	○	○	○	○	○	○
	508	1	1299	○	○		○	○	○	○	○	○	○	○
	509	1	1300	○	○		○	○		○	○		○	○
	510	1	1301	○	○		○	○		○	○	○
	511	1	1302	○	▽		○	○	○	○	○	○	○	○
	512	1	1303	○		◎	◎	◎	◎	◎	◎	◎	◎	◎
	513	1	1304	○		◎	◎	◎	◎		◎	◎	○	○
	514	1	1305	○		◎	◎		◎	◎	●	●	●	●
	515	1	1306	○		○	○	○	○	○	○	○
	516	1	1307	○		○	○	○	○	○
	517	1	1308	○		○	○	○	○	○	○	○
	518	1	1309	○		○	○	○			○	○	○	○
	519	1	1310	○		○	○	○
	520	1	1311	○		○	○	▽
	521	1	1312	○		○	○		○	○	○	○
	522	1	1313	○		○	○		◎	◎	◎	◎	○	○
	523	1	1314	○		○		○	○	○	○	○	○	○
	524	1	1315	○		○		○	○	○				○
	525	1	1316	○		○		○			○	○	○	○
	526	1	1317	○		○	○
	527	1	1318	○		▽
	528	1	1319	○			●	●	●	●	●	●	●	●
	529	1	1320	○			●
	530	1	1321	○			○	○	○
	531	1	1322	○			○		○	○	○	○	○	○
	532	1	1323	○			○			○	○	○	○	○
	533	1	1324	○			○
	534	1	1325	○			▽	▽
	535	1	1326	○			▽
	536	1	1327	○				●
	537	1	1328	○				○		○	○	○	○	○
	538	1	1329	○				○	○	○	○	○	○	○
	539	1	1330	○					○	○	○	○	○	▽
	540	1	1331	○					○	○	○	○	○	○
	541	1	1332	○							◎
	542	1	1333	○								○	○
	543	1	1334	○									▽	▽
	544	1	1335	▽	◎	◎	●		●		●	●	▽
	545	1	1336	▽	◎	◎	◎	◎	◎	◎	◎	◎
	546	1	1337	▽	◎	◎	◎	◎	◎	◎	▽
	547	1	1338	▽	◎	◎
	548	1	1339	▽	○	○	○	○	○
	549	1	1340	▽	○	○
	550	1	1341	▽	○		○	○	○	○	○	○	○	○
	551	1	1342	▽	○		○	○
	552	1	1343	▽	○
	553	1	1344	▽	▽	◎	◎	◎	◎
	554	1	1345	▽	▽	▽	▽	▽	▽	▽	▽	▽	▽	▽
	555	1	1346	▽	▽	▽
	556	1	1347	▽	▽		▽
	557	1	1348	▽		▽	○	○	○	○	○	○	○
	558	1	1349	▽			○				○	○	○	○
	559	1	1350	▽						▽				▽
		1350

## Sheet: Patterns
											Prescriptions
											●	VKA and Antiplatelet
											◎	VKA only
											○	Antiplatelet only
											▽	None
	Pattern ID	Site	Pt	Number of subjects	Discharge	1 Mo	2 Mo	3 Mo	6 Mo	9 Mo	12 Mo	18 Mo	24 Mo	30 Mo	36 Mo
	1	1	22	266	◎	◎	◎	◎	◎	◎	◎	◎	◎	◎	◎
	2	1	4	107	◎
	3	1	2	70	○
	4	1	5	51	▽
	5	1	1	41	◎	◎
	6	3	82	29	●	●	●	●	●	●	●	●	●	●	●
	7	1	133	23	○	○	○	○	○	○	○	○	○	○	○
	8	1	9	23	◎	◎	◎
	9	1	64	22	◎	◎	◎	◎	◎	◎	◎	◎
	10	1	130	20	◎	◎	◎	◎	◎
	11	3	104	20	◎	◎	◎	◎
	12	1	108	16	◎	◎	◎	◎	◎	◎	◎	◎	◎	◎
	13	2	41	16	◎	◎	◎	◎	◎	◎	◎	◎	◎
	14	2	18	16	◎	◎	◎	◎	◎	◎	◎
	15	1	126	15	●
	16	1	150	13	◎	◎	◎	◎	◎	◎
	17	4	93	13	○	○	○	○
	18	1	23	12	●	◎	◎	◎	◎	◎	◎	◎	◎	◎	◎
	19	1	20	11	◎	▽
	20	2	15	11	○	○
	21	2	79	10	○	○	○
	22	1	51	9	◎	◎	◎	◎	◎			◎	◎	◎	◎
	23	5	147	7	◎	◎	◎	◎	○	○	○	○	○	○	○
	24	2	97	7	○	○	○	○	○	○	○	○	○
	25	7	92	7	◎	◎	◎	▽
	26	7	6	6	◎	◎	◎	◎	◎	◎	◎	◎	●	●	●
	27	2	6	6	○	◎	◎	◎	◎	◎	◎	◎	◎	◎	◎
	28	1	59	6	◎	◎			◎	◎	◎	◎	◎	◎	◎
	29	2	80	6	○	▽
	30	5	56	5	●	●	●	●	●	●	◎	◎	◎	◎	◎
	31	4	137	5	◎	◎	◎	◎	◎	◎	◎	○	○	○	○
	32	5	14	5	○	○	◎	◎	◎	◎	◎	◎	◎	◎	◎
	33	6	65	5	●	●	●	●	●	●	●	●
	34	6	136	5	○	○	○	○	○	○	○
	35	2	131	5	○	○	○	○	○	○
	36	8	39	5	○	○	○	○	▽
	37	1	61	5	◎	◎	◎	◎			◎	◎	◎	◎	◎
	38	2	108	5	◎	◎	◎	◎				◎	◎	◎	◎
	39	3	39	4	●	●	●	●	◎	◎	◎	◎	◎	◎	◎
	40	2	118	4	◎	◎	◎	◎	◎	◎	◎	◎	◎	◎	●
	41	9	136	4	○	○	○	○	○	○	○	○	○	○
	42	2	76	4	◎	◎	◎	◎	◎	◎	◎	▽
	43	1	135	4	○	○	○	○	○			○	○	○	○
	44	9	124	4	○	○	○	○	○
	45	2	16	4	○	○	○	▽
	46	5	40	4	○	○	▽
	47	1	47	4	●	●
	48	3	116	4	◎								◎	◎	◎
	49	4	98	3	●	●	●	●	●	●	●	●	●	●	◎
	50	2	70	3	◎	●	●	●	●	●	●	◎	◎	◎	◎
	51	2	83	3	◎	◎	●	●	●	●	●	●	●	●	●
	52	2	100	3	◎	◎	◎	◎	◎	◎	◎	●	●	●	●
	53	7	132	3	◎	◎	◎	◎	◎	◎	◎	◎	◎	●	●
	54	2	60	3	◎	◎	◎	◎	◎	◎	◎	◎	◎	◎	○
	55	5	82	3	◎	◎	◎	○	○	○	○	○	○	○	○
	56	2	90	3	◎	○	○	○	○	○	○	○	○	○	○
	57	4	114	3	◎	◎	◎	◎	◎	◎	○	○	○	○
	58	8	57	3	◎	◎	◎	◎	◎	◎	○
	59	1	37	3	○	○	○	○			○	○	○	○	○
	60	1	54	3	◎	◎				◎	◎	◎	◎	◎	◎
	61	4	10	3	●	▽
	62	3	128	3	◎									◎	◎
	63	6	24	2	●	●	●	●	●	●	●	●	◎	◎	◎
	64	1	6	2	●	●	●	●	●	●	●	○	○	○	○
	65	6	91	2	●	●	●	○	○	○	○	○	○	○	○
	66	2	93	2	●	◎	◎	◎	◎	◎	●	●	●	●	●
	67	2	78	2	◎	●	●	●	●	●	●	●	●	●	●
	68	2	77	2	◎	●	●	●	●	●	●	●	◎	◎	◎
	69	5	57	2	◎	◎	◎	◎	◎	◎	◎	◎	◎	◎	▽
	70	8	21	2	◎	◎	◎	◎	◎	○	○	○	○	○	○
	71	5	123	2	◎	◎	○	○	○	○	○	○	○	○	○
	72	5	29	2	○	●	●	●	●	●	●	●	●	●	●
	73	6	37	2	●	●	●	●	●	●	●	●	●	●
	74	2	134	2	◎	◎	◎	◎	◎	◎	◎	◎	◎	○
	75	8	71	2	●	◎	◎	◎	◎	◎	◎	◎	◎
	76	2	128	2	◎	◎	◎	◎	◎	◎	◎	◎	▽
	77	2	126	2	◎	●	●	●	●	●	●	●
	78	2	25	2	○	○	○	○	○	○	○	○
	79	4	7	2	●	◎	◎	◎	◎	◎	◎
	80	9	91	2	◎	◎	◎	◎	◎	○
	81	5	49	2	◎	◎	◎	◎	○	○
	82	6	67	2	◎	◎	◎	◎	◎			◎	◎
	83	8	18	2	◎	◎	◎	◎	▽
	84	7	7	2	◎	◎	◎	◎				◎
	85	8	22	2	●	●	●	●
	86	4	117	2	◎	◎	◎	○
	87	2	145	2	◎	▽	▽	▽
	88	3	26	2	◎	◎	◎					◎	◎	◎	◎
	89	3	68	2	◎	◎	◎					◎
	90	4	139	2	◎	◎			◎
	91	5	77	2	◎	◎				◎
	92	5	4	2	◎	◎					◎	◎	◎	◎	◎
	93	3	48	2	◎	◎						◎	◎	◎	◎
	94	7	89	2	▽	▽
	95	1	36	2	◎					◎	◎	◎	◎	◎	◎
	96	2	82	2	○					▽
	97	3	115	2	●							○	○	○	○
	98	1	97	2	◎							◎	◎	◎	◎
	99	3	113	2	◎							○	○	○	○
	100	6	139	2	○							▽
	101	3	100	2	▽									○	○
	102	8	1	1	●	●	●	●	●	●	●	●	●	◎	◎
	103	5	131	1	●	●	●	●	●	●	●	●	●	▽	▽
	104	6	105	1	●	●	●	●	●	●	●	●	○	○	●
	105	8	59	1	●	●	●	●	●	●	●	●	○	○	○
	106	6	95	1	●	●	●	●	●	●	●	◎	◎	◎	◎
	107	2	58	1	●	●	●	●	●	●	●	◎	◎	▽	○
	108	2	102	1	●	●	●	●	●	●	○	○	○	○	▽
	109	4	9	1	●	●	●	●	●	◎	●	◎	◎	◎	◎
	110	9	95	1	●	●	●	●	◎	◎	◎	●	●	●	●
	111	9	101	1	●	●	●	●	○	○	○	○	○	◎	◎
	112	6	115	1	●	●	●	◎	◎	●	●	●	●	●	●
	113	1	84	1	●	●	●	◎	◎	◎	◎	◎	◎	◎	◎
	114	7	139	1	●	●	●	◎	◎	○	○	○	○	○	○
	115	1	123	1	●	●	●	○	○	◎	◎	●	●	●	●
	116	8	31	1	●	●	◎	◎	◎	◎	●	●	●	●	▽
	117	6	150	1	●	●	◎	◎	◎	◎	◎	◎	◎	◎	◎
	118	9	109	1	●	●	○	○	○	○	○	○	○	○	○
	119	1	18	1	●	◎	●	●	●	●	●	●	●	●	●
	120	6	69	1	●	◎	◎	◎	◎	◎	◎	●	◎	◎	◎
	121	6	149	1	●	○	○	○	○	○	○	▽	▽	▽	▽
	122	5	150	1	◎	●	●	●	●	●	●	●	○	○	○
	123	5	17	1	◎	●	●	●	●	◎	◎	◎	◎	◎	◎
	124	9	41	1	◎	●	●	●	◎	◎	◎	◎	◎	◎	◎
	125	1	131	1	◎	●	●	●	○	●	●	●	●	●	●
	126	9	67	1	◎	●	●	●	○	○	▽	●	●	●	●
	127	9	49	1	◎	●	◎	◎	◎	◎	◎	●	●	●	●
	128	2	51	1	◎	●	◎	◎	◎	◎	◎	◎	◎	◎	◎
	129	6	104	1	◎	●	◎	◎	◎	◎	◎	◎	◎	◎	○
	130	2	67	1	◎	●	○	○	○	●	◎	◎	◎	◎	◎
	131	6	11	1	◎	◎	●	●	●	●	●	●	●	●	○
	132	2	141	1	◎	◎	●	◎	◎	●	●	◎	◎	●	●
	133	8	140	1	◎	◎	◎	●	●	●	●	●	●	●	●
	134	9	83	1	◎	◎	◎	●	●	●	●	○	○	○	○
	135	4	131	1	◎	◎	◎	◎	●	●	●	○	○	●	●
	136	1	129	1	◎	◎	◎	◎	◎	●	●	●	●	●	●
	137	4	108	1	◎	◎	◎	◎	◎	●	●	●	◎	◎	◎
	138	6	146	1	◎	◎	◎	◎	◎	◎	●	●	●	●	●
	139	2	92	1	◎	◎	◎	◎	◎	◎	●	●	●	●	◎
	140	6	122	1	◎	◎	◎	◎	◎	◎	●	●	●	○	○
	141	6	44	1	◎	◎	◎	◎	◎	◎	◎	●	●	◎	◎
	142	5	145	1	◎	◎	◎	◎	◎	◎	◎	◎	●	●	◎
	143	6	51	1	◎	◎	◎	◎	◎	◎	◎	◎	●	◎	◎
	144	6	17	1	◎	◎	◎	◎	◎	◎	◎	◎	◎	●	◎
	145	8	63	1	◎	◎	◎	◎	◎	◎	◎	◎	◎	○	●
	146	9	8	1	◎	◎	◎	◎	◎	◎	◎	◎	◎	▽	◎
	147	5	128	1	◎	◎	◎	◎	◎	◎	◎	◎	▽	▽	▽
	148	8	50	1	◎	◎	◎	◎	◎	◎	◎	○	○	●	●
	149	9	62	1	◎	◎	◎	◎	◎	◎	◎	▽	◎	◎	◎
	150	8	138	1	◎	◎	◎	◎	◎	○	◎	○	◎	◎	◎
	151	2	10	1	◎	◎	◎	◎	○	●	●	◎	◎	◎	◎
	152	8	148	1	◎	◎	◎	◎	○	◎	◎	◎	◎	◎	◎
	153	9	103	1	◎	◎	◎	○	◎	◎	◎	◎	◎	◎	◎
	154	8	111	1	◎	◎	○	◎	◎	◎	◎	◎	○	◎	◎
	155	8	108	1	◎	○	●	◎	●	●	●	●	●	●	●
	156	6	127	1	◎	○	◎	◎	◎	◎	◎	◎	◎	◎	◎
	157	6	145	1	◎	▽	◎	◎	●	●	●	●	●	●	●
	158	7	53	1	◎	▽	◎	◎	◎	◎	◎	◎	◎	◎	◎
	159	4	145	1	◎	▽	◎	◎	◎	◎	◎	○	○	○	○
	160	5	36	1	◎	▽	▽	○	◎	◎	◎	◎	◎	◎	◎
	161	2	84	1	◎	▽	▽	▽	○	○	○	○	○	○	○
	162	2	95	1	◎	▽	▽	▽	▽	▽	▽	●	●	◎	●
	163	8	38	1	○	●	●	●	●	●	●	◎	◎	◎	◎
	164	4	1	1	○	●	◎	◎	◎	◎	◎	◎	◎	◎	◎
	165	3	27	1	○	○	◎	◎	◎	◎	◎	●	●	●	●
	166	4	15	1	○	○	◎	◎	◎	◎	◎	◎	◎	○	○
	167	3	21	1	○	○	○	●	●	●	●	●	●	●	●
	168	2	66	1	○	○	○	○	○	●	●	◎	◎	◎	◎
	169	8	77	1	○	○	○	○	○	◎	◎	◎	◎	○	○
	170	8	127	1	○	○	○	○	○	○	○	○	○	◎	◎
	171	3	73	1	▽	○	○	○	○	○	○	○	○	○	○
	172	9	39	1	▽	▽	▽	▽	▽	▽	▽	▽	▽	▽	▽
	173	8	112	1	●	●	●	●	●	●	●	●	●	○
	174	6	53	1	●	●	◎	◎	◎	◎	◎	◎	●	▽
	175	4	57	1	●	●	◎	◎	◎	◎	◎	◎	◎	◎
	176	3	34	1	●	●	○	▽	▽	▽	▽	▽	▽	▽
	177	6	148	1	●	◎	◎	●	●	●	●	●	●	●
	178	6	119	1	●	◎	◎	◎	◎	●	●	◎	◎	◎
	179	3	9	1	●	◎	◎	◎	◎	◎	◎	◎	◎	▽
	180	6	50	1	◎	◎	◎	◎	●	◎	◎	◎	◎	◎
	181	5	35	1	◎	◎	◎	◎	◎	◎	◎	○	○	▽
	182	8	54	1	◎	◎	◎	◎	◎	○	◎	◎	◎	◎
	183	8	119	1	◎	◎	◎	○	◎	◎	◎	◎	◎	◎
	184	6	123	1	▽	◎	◎	●	●	●	●	●	●	▽
	185	3	40	1	●	●	●	●	●	●	●	●	●
	186	6	74	1	●	●	●	●	●	●	●	●	▽
	187	1	77	1	●	●	●	○	○	○	○	○	○
	188	2	110	1	●	●	◎	▽	◎	◎	◎	◎	●
	189	2	96	1	◎	●	◎	◎	●	●	◎	◎	◎
	190	3	66	1	◎	◎	◎	●	○	○	○	○	○
	191	6	22	1	◎	◎	◎	◎	◎	●	●	●	●
	192	7	104	1	◎	◎	◎	◎	◎	◎	◎	◎	●
	193	5	20	1	◎	◎	◎	◎	◎	◎	◎	◎	○
	194	2	11	1	◎	◎	◎	◎	◎	◎	○	○	○
	195	2	125	1	◎	◎	◎	◎	○	○	▽	○	○
	196	2	63	1	◎	○	○	▽	▽	▽	▽	○	○
	197	6	142	1	○	◎	◎	◎	◎	◎	◎	◎	◎
	198	5	130	1	○	◎	◎	◎	◎	◎	◎	◎	▽
	199	6	103	1	▽	◎	◎	◎	◎	◎	◎	◎	◎
	200	5	37	1	◎	◎	◎	◎	▽	○	●	●			●
	201	6	70	1	●	●	●	●	●	●	●	▽
	202	4	80	1	●	●	●	●	●	◎	◎	○
	203	5	41	1	◎	◎	◎	●	●	●	●	●
	204	1	17	1	◎	◎	◎	◎	◎	◎	◎	○
	205	5	122	1	◎	◎	○	○	○	●	●	○
	206	7	57	1	◎	▽	◎	◎	◎	◎	◎	◎
	207	9	44	1	○	●	●	●	●	●	●	●
	208	9	2	1	○	◎	●	●	●	●	●	●
	209	1	109	1	○	○	○	◎	◎	◎	◎	◎
	210	2	53	1	○	○	○	○	▽	▽	▽	▽
	211	6	79	1	▽	◎	◎	◎	◎	◎	◎	▽
	212	7	69	1	◎	◎	◎	◎	◎	◎	◎			○	○
	213	7	5	1	◎	◎	◎	◎	◎	◎	◎			◎
	214	9	1	1	○	○	○	○	○	○	○				○
	215	3	31	1	●	●	●	▽	●	●	●
	216	9	97	1	●	▽	○	○	○	○	○
	217	2	72	1	◎	●	●	○	○	○	○
	218	2	38	1	◎	●	○	○	○	○	○
	219	5	93	1	◎	◎	●	●	●	●	●
	220	5	149	1	◎	◎	◎	◎	◎	◎	▽
	221	5	108	1	◎	◎	◎	◎	▽	○	○
	222	5	31	1	◎	▽	○	○	○	○	○
	223	2	62	1	○	◎	◎	◎	◎	◎	◎
	224	8	147	1	○	○	◎	◎	◎	◎	◎
	225	2	54	1	○	○	○	○	○	○	◎
	226	2	107	1	○	○	○	○	○	○	▽
	227	9	88	1	○	○	○	▽	▽	▽		▽	▽	▽	▽
	228	1	57	1	◎	◎	◎	◎	◎	◎			◎	◎	◎
	229	7	144	1	○	○	○	○	○	○			◎
	230	2	68	1	◎	◎	◎	◎	◎	◎				▽
	231	6	36	1	●	●	●	●	●	◎
	232	9	30	1	●	▽	◎	●	●	●
	233	6	78	1	◎	●	●	●	●	◎
	234	2	147	1	◎	◎	◎	◎	◎	▽
	235	4	34	1	◎	◎	◎	○	◎	◎
	236	1	124	1	◎	◎	○	○	○	○
	237	2	138	1	◎	◎	▽	◎	◎	▽
	238	2	122	1	◎	◎	▽	▽	○	○
	239	8	84	1	◎	○	○	◎	○	○
	240	6	140	1	○	◎	◎	◎	◎	◎
	241	9	26	1	○	◎	◎	◎	◎	○
	242	8	102	1	○	◎	◎	◎	○	○
	243	7	91	1	○	○	○	○	○	▽
	244	2	146	1	▽	○	○	○	○	○
	245	9	133	1	▽	▽	◎	◎	◎	◎
	246	7	10	1	◎	◎	◎	◎	▽		◎
	247	6	107	1	●	●	●	●	●			●	●	●	●
	248	6	61	1	●	●	●	●	●			◎	◎	◎	◎
	249	6	98	1	●	●	●	●	●			○	○	○	○
	250	6	109	1	●	◎	◎	◎	◎			◎	◎	◎	◎
	251	6	101	1	◎	◎	◎	●	●			●	●	◎	◎
	252	3	75	1	◎	◎	◎	○	○			◎	◎	◎	◎
	253	6	83	1	●	●	●	●	●			●	●	◎
	254	1	100	1	◎	◎	◎	◎	◎			◎	◎	◎
	255	7	70	1	◎	◎	◎	◎	◎			◎	◎	▽
	256	7	134	1	◎	◎	◎	◎	◎						◎
	257	7	137	1	●	●	●	●	●
	258	6	48	1	●	●	●	●	▽
	259	2	148	1	●	◎	◎	◎	●
	260	5	23	1	◎	●	▽	▽	◎
	261	5	103	1	◎	◎	◎	●	▽
	262	5	137	1	◎	◎	◎	◎	○
	263	2	101	1	◎	◎	▽	○	○
	264	4	125	1	○	◎	◎	◎	◎
	265	7	121	1	○	○	○	○	●
	266	5	24	1	▽	○	○	○	○
	267	6	128	1	◎	●	●	●			●	●	●	●	●
	268	6	100	1	◎	◎	◎	●			●	●	●	●	●
	269	8	143	1	◎	◎	◎	○			○	○	○	○
	270	3	17	1	●	●	●	◎			◎	◎
	271	9	79	1	○	○	○	▽			○	○
	272	2	21	1	◎	◎	◎	○			▽
	273	5	67	1	○	◎	◎	◎			◎
	274	6	6	1	●	●	●	◎				◎	◎	◎	◎
	275	8	35	1	◎	◎	◎	◎				◎	●	◎	◎
	276	1	105	1	◎	◎	◎	◎				○	○	○	○
	277	6	64	1	○	●	●	●				●	○	○	○
	278	8	53	1	○	◎	◎	◎				◎	◎	◎	◎
	279	8	65	1	◎	◎	◎	◎				◎	◎	◎
	280	1	144	1	○	○	○	○				○	○	○
	281	4	82	1	◎	◎	◎	◎				▽
	282	2	87	1	◎	◎	◎	○				▽
	283	9	115	1	◎	◎	◎	◎					○	○	○
	284	8	34	1	◎	◎	◎	◎					▽
	285	3	69	1	◎	◎	◎	◎						◎	◎
	286	2	113	1	◎	◎	◎	◎						◎	○
	287	9	22	1	◎	▽	▽	▽						▽
	288	5	59	1	◎	◎	◎	○
	289	4	65	1	◎	◎	▽	▽
	290	2	29	1	◎	○	○	○
	291	8	97	1	○	◎	◎	◎
	292	3	28	1	○	○	○	●
	293	6	41	1	●	●	●			●	●	●	●	●	●
	294	6	34	1	●	●	◎			◎	◎	◎	◎	◎	◎
	295	1	91	1	●	●	◎			◎	◎	◎	○	○	○
	296	3	96	1	◎	◎	◎			○	○	◎	◎	◎
	297	3	25	1	◎	◎	◎			◎	◎
	298	5	68	1	◎	◎	◎			▽	◎
	299	3	12	1	●	●	●				●	●	●	●	●
	300	6	30	1	●	●	●				◎	◎	◎	◎	◎
	301	9	78	1	◎	●	○				○	○	○	○	▽
	302	3	108	1	◎	◎	◎				◎	◎	◎	◎	◎
	303	2	116	1	○	○	○				○			○
	304	6	99	1	●	●	●				●
	305	6	33	1	●	●	◎					◎	◎	◎
	306	9	131	1	◎	◎	◎					◎	◎
	307	9	34	1	◎	◎	◎						◎	●	○
	308	5	2	1	◎	◎	◎							◎	○
	309	7	71	1	◎	◎	◎							▽	○
	310	8	14	1	●	◎	◎							●
	311	6	63	1	●	●	●
	312	3	102	1	●	●	◎
	313	4	106	1	●	●	▽
	314	8	4	1	●	◎	▽
	315	3	65	1	◎	◎	○
	316	4	123	1	◎	◎	▽
	317	7	86	1	◎	○	○
	318	5	33	1	◎	▽	▽
	319	6	143	1	▽	◎	◎
	320	2	89	1	▽	○	○
	321	2	19	1	▽	▽	▽
	322	9	55	1	○	▽		○	○	○	○	○	○	○	○
	323	6	117	1	●	▽		○	▽
	324	1	15	1	▽	▽		▽
	325	6	89	1	●	●			●	●	●	●	●	●	●
	326	6	19	1	◎	●			●	○	○	●	○	○	○
	327	9	66	1	◎	◎			◎	◎	◎	◎	◎	▽	◎
	328	9	148	1	◎	◎			▽	▽	○	○	○	○	▽
	329	9	23	1	◎	◎			◎	◎	◎	◎	◎
	330	5	12	1	◎	◎			◎	◎	○	○
	331	9	35	1	◎	●			▽		○	●	●	●	●
	332	1	12	1	◎	◎			◎			◎	◎	◎	◎
	333	4	133	1	◎	▽			▽
	334	4	138	1	●	●				●	●	●	●	●	●
	335	6	54	1	◎	●				◎	◎	◎	◎	◎	◎
	336	6	135	1	◎	◎				◎	●	○	○	○	○
	337	6	114	1	●	●				▽	○	○	○	○
	338	9	63	1	○	○				○	○	▽
	339	2	40	1	◎	◎				▽
	340	9	46	1	◎	◎					◎	◎	◎
	341	4	105	1	◎	◎					◎				◎
	342	1	103	1	◎	◎					◎
	343	7	140	1	○	○					○
	344	6	8	1	●	●						◎	●	●	●
	345	6	87	1	●	●						●	●
	346	4	54	1	◎	◎						●
	347	8	20	1	○	◎						○
	348	3	63	1	◎	◎							◎	◎	◎
	349	2	109	1	●	●									○
	350	3	45	1	●	○
	351	9	4	1	◎	●
	352	7	82	1	◎	○
	353	1	46	1	○	◎
	354	2	104	1	▽	○
	355	9	93	1	▽		▽	○	○	○	○	○	○	○
	356	3	84	1	▽			○				○	○	○	○
	357	9	14	1	●				▽	◎	◎	◎	◎	◎	◎
	358	1	58	1	◎				◎	◎	◎	◎	◎	○	○
	359	5	127	1	◎				▽	▽
	360	3	92	1	◎				◎			◎	◎	◎	◎
	361	1	127	1	◎				○			◎
	362	7	8	1	◎				◎
	363	2	140	1	◎				○
	364	9	61	1	○					○	○	○	○	○	○
	365	7	129	1	○					○	○	○	○	○	▽
	366	7	9	1	◎					◎	◎	◎
	367	2	57	1	◎					◎
	368	4	104	1	◎						◎	◎	◎	◎	◎
	369	2	137	1	◎						▽	◎	◎	◎	◎
	370	2	105	1	▽						▽				▽
	371	7	83	1	◎						◎
	372	2	124	1	◎						○
	373	3	112	1	◎							●	●	●	●
	374	3	121	1	◎							●	●	●	▽
	375	3	133	1	◎							◎			◎
	376	3	143	1	◎							◎
	377	8	24	1	○							◎
	378	3	120	1	◎								○	○	○
	379	3	131	1	◎								●	●
	380	3	114	1	○								○	○
	381	8	25	1	●								○
	382	4	16	1	◎								◎
	383	9	38	1	○									▽	▽
	384	7	143	1	◎									◎
	385	3	124	1	●										●
	386	7	35	1	◎										◎
	387	3	126	1	◎										○
